# Supplementary material for: Homeostatic regulation of perisynaptic matrix metalloproteinase 9 (MMP9) activity in the amblyopic visual cortex
Source: eLife. 2019 Dec 23;8:e52503. doi: 10.7554/eLife.52503 (PMC6961978; doi:10.7554/eLife.52503)
Supplement: Figure 1—source data 1. [file elife-52503-fig1-data1.xlsx]

## Sheet: Fig.1A
size	cMD		LRx			density	cMD		LRx			intensity	cMD		LRx
	dep	non	dep	non			dep	non	dep	non			dep	non	dep	non
	0.582941	0.913604	0.952398	1.09405			18.214	18.9282	103.213	50.7134			32.0948	31.8842	60.6894	65.2486
	0.843309	0.941514	1.01096	0.957887			24.2853	49.642	69.6417	59.999			46.0202	37.0811	61.8411	57.0803
	0.772491	0.918239	0.996939	0.854865			19.6425	32.8566	52.4991	74.2845			42.2677	40.783	50.866	55.1157
	1.01009	0.807875	0.940533	0.886619			19.6425	11.4284	48.2135	140.712			39.881	47.151	58.4266	47.6077
	0.725082	0.610112	0.631726	0.670493			34.6423	31.7852	79.6415	50.7134			40.3484	46.0516	56.5678	46.7603
	0.711678		0.723301	0.716802			21.0711		48.5706	44.9992			52.3271		45.4964	55.708

## Sheet: Fig.1B
cMD				LRx
dep		non		dep		non
ori	shftd	ori	shftd	ori	shftd	ori	shftd
36.2319	15.942	35.7895	0	43.1818	3.24675	69.0789	19.0789
8.64198	0	17.6471	8.08824	43.7229	11.2554	49.7076	11.1111
36.6667	16.6667	24.7059	14.1176	49.0066	2.64901	51.2438	13.9303
19.2982	7.01754	12.5	4.16667	52.2388	19.9005	46.8085	2.97872
34.8837	6.97674	35.2273	0	44.2149	0.826446	47.0588	1.47059
33.3333	0			40.566	3.77358	36.8	1.6

## Sheet: Fig.1C
Colocalized
PV+				PV-
cMD		LRx		cMD		LRx
dep	non	dep	non	dep	non	dep	non
6.61077	0	23.7983	13.0106	7.23676	8.05761	35.3157	36.4035
4.6855	3.28323	15.9683	18.3219	1.14908	10.6084	38.3363	32.3911
5.38303	2.33591	23.9619	24.6544	5.5914	9.57508	27.1895	44.6746
6.12544	10.029	18.7651	28.0519	6.81414	2.32865	29.1619	34.5056

## Sheet: Fig.1D
cMD		LRx
dep	non	dep	non
75.7383	106.357	129.979	189.737
98.1749	76.1739	112.532	139.442
114.682	100.057	169.172	131.44
120.12	117.412	173.209	118.84
105.685	118.323	130.571	122.747
96.5249	88.4634	132.927	117.304
95.5647	93.2141	103.206	115.639
		112.763	115.823
