# Supplementary material for: Homeostatic regulation of perisynaptic matrix metalloproteinase 9 (MMP9) activity in the amblyopic visual cortex
Source: eLife. 2019 Dec 23;8:e52503. doi: 10.7554/eLife.52503 (PMC6961978; doi:10.7554/eLife.52503)
Supplement: Figure 2—source data 1. [file elife-52503-fig2-data1.xlsx]

## Sheet: Fig.2B
WFA	deth (um)	cMD dep mean	cMD dep sem	cMD non mean	cMD non sem	LRx dep mean	LRx dep sem	LRx non mean	LRx non sem		Agg	deth (um)	cMD dep mean	cMD dep sem	cMD non mean	cMD non sem	LRx dep mean	LRx dep sem	LRx non mean	LRx non sem		PV	deth (um)	cMD dep mean	cMD dep sem	cMD non mean	cMD non sem	LRx dep mean	LRx dep sem	LRx non mean	LRx non sem
	0	44.0706	4.79706	43.8793	7.37402	20.8676	4.24145	17.4738	3.36802			0	18.9114	1.97522	18.934	2.98432	8.2456	1.26001	7.93548	1.18251			0	15.7518	2.66234	18.694	3.22368	13.4827	5.21283	22.6778	7.69082
	1.38378	44.6631	4.34151	46.0376	7.60236	22.2041	4.23079	19.1641	3.52324			1.38378	19.4177	1.84159	19.9871	2.99125	9.05937	1.20799	8.8229	1.163			1.38378	15.4671	2.41044	18.3979	3.06487	13.5461	4.88787	23.2326	7.9773
	2.76756	45.3089	4.40082	47.4274	7.69528	23.5591	4.26767	20.6974	3.60115			2.76756	19.8504	1.71987	21.0106	3.0008	9.73516	1.18445	9.71274	1.18697			2.76756	14.9509	2.28772	18.5885	3.19881	13.6728	4.58573	23.6703	8.19223
	4.15134	45.5363	4.50665	48.3873	7.4826	24.5961	4.32993	21.835	3.63544			4.15134	20.4581	1.62431	21.8701	3.02759	10.4552	1.1718	10.447	1.14293			4.15134	14.5068	2.10704	18.8466	3.43624	13.8347	4.39141	23.4372	7.59611
	5.53512	46.5691	4.34304	49.8492	7.74346	25.8989	4.34129	22.5999	3.73343			5.53512	21.0957	1.51901	22.3614	2.91768	11.0839	1.16777	11.0735	1.11787			5.53512	14.3323	2.07964	18.8177	3.47441	13.0695	3.98409	22.7092	6.56648
	6.9189	47.4293	4.04677	50.9947	7.71138	27.0098	4.33265	23.8878	3.80408			6.9189	21.5754	1.32154	23.116	2.83477	11.6436	1.14844	11.8463	1.0954			6.9189	14.1211	2.08109	18.8019	3.53066	12.0741	3.37629	22.1689	5.79051
	8.30268	48.2957	4.14767	51.6971	7.46258	28.0489	4.21587	25.1613	3.96931			8.30268	22.0329	1.21746	23.6709	2.77651	12.1866	1.1692	12.4858	1.04662			8.30268	13.9043	2.07335	18.4334	3.40583	11.7529	3.27501	21.6013	5.13128
	9.68646	48.7812	3.85862	52.0028	7.54706	28.7074	4.21418	26.1463	4.11506			9.68646	22.351	1.20645	24.0729	2.76329	12.6086	1.2083	12.9378	0.960201			9.68646	13.6095	2.12085	17.7397	3.06868	11.5137	3.167	21.3171	4.94651
	11.0702	48.8984	3.54846	51.7606	7.29872	29.2191	4.22995	27.0478	4.1812			11.0702	22.7166	1.17396	24.3857	2.63992	12.9533	1.22775	13.4591	0.92309			11.0702	13.4577	2.15471	17.0491	2.81098	11.0854	2.82124	21.4055	5.05074
	12.454	48.9397	3.38693	51.5635	6.85421	29.8275	4.25368	27.8863	4.25577			12.454	23.2327	1.17718	24.6802	2.50796	13.25	1.19098	14.1669	0.919335			12.454	13.4796	2.15343	16.8967	2.82063	10.6252	2.58793	21.5696	5.06124
	13.8378	49.1556	3.53723	51.6997	6.80897	30.6975	4.24132	28.8865	4.44045			13.8378	23.5876	1.20985	25.1828	2.46466	13.607	1.1914	14.7183	0.868123			13.8378	13.1068	2.05234	16.8551	2.88538	10.2767	2.3296	21.4033	5.17245
	15.2216	49.6346	3.48452	52.8198	6.92326	30.9533	4.19962	29.5934	4.56393			15.2216	24.0603	1.33607	25.682	2.39845	14.0044	1.20191	15.0539	0.799218			15.2216	12.8618	2.00739	16.7234	2.70563	10.0272	2.17768	20.7539	5.14337
	16.6054	49.4303	3.27382	52.9459	6.56196	31.1512	4.13301	30.1141	4.55629			16.6054	24.4325	1.4603	25.8308	2.27121	14.2234	1.19945	15.3853	0.780776			16.6054	12.8714	2.05109	16.7466	2.57693	9.64654	2.11977	20.132	4.84393
	17.9891	49.6121	3.16607	53.0173	6.29135	31.5786	4.05445	30.4926	4.59793			17.9891	24.6299	1.4876	26.1727	2.17691	14.4147	1.22789	15.8772	0.816625			17.9891	12.6132	1.98859	16.7112	2.47134	9.58392	2.03598	19.3797	4.34248
	19.3729	49.8026	3.10086	53.1837	6.23478	31.827	4.15183	31.0472	4.55629			19.3729	25.004	1.5545	26.6077	2.06196	14.8294	1.29897	16.2031	0.796426			19.3729	12.5292	2.01031	16.689	2.34237	9.5657	1.88435	18.3403	3.60255
	20.7567	49.8182	2.86194	53.5878	5.93276	32.1539	4.01378	31.2519	4.53425			20.7567	25.3079	1.68583	27.0234	1.96217	15.1324	1.30834	16.4488	0.795219			20.7567	12.5075	2.02125	16.4447	2.13989	9.47736	1.79801	17.1501	2.85681
	22.1405	49.9367	2.65176	53.9084	5.71036	32.6339	3.91087	31.3648	4.39684			22.1405	25.514	1.71719	27.683	1.96056	15.3664	1.269	16.7409	0.829412			22.1405	12.5676	2.01925	16.0106	2.06215	9.61478	1.8308	15.9445	2.26546
	23.5242	50.3511	2.7664	54.1071	5.34181	32.7989	3.86168	31.6355	4.35146			23.5242	25.95	1.72541	28.0481	1.85746	15.6045	1.24036	16.8566	0.884217			23.5242	12.506	1.96099	15.5557	2.10288	9.75779	1.90597	15.2695	1.94647
	24.908	50.5378	2.93651	54.0531	5.01473	32.8582	3.78617	32.0906	4.31178			24.908	26.276	1.80696	28.1367	1.77945	16.0078	1.30173	16.9828	0.921986			24.908	12.3774	1.90733	15.5135	2.10233	9.65727	1.98623	14.4546	1.64612
	26.2918	50.4906	2.91915	53.9634	4.90876	33.3649	3.82338	31.983	4.3343			26.2918	26.5514	1.96992	28.5989	1.72673	16.2809	1.32693	17.1426	0.921998			26.2918	12.2875	1.85246	15.1578	2.01613	9.54145	1.94348	13.7711	1.47815
	27.6756	50.3726	2.72153	54.2171	5.05247	33.4364	3.85501	31.8848	4.37087			27.6756	26.8496	2.04057	28.8858	1.7409	16.629	1.3234	17.292	0.99109			27.6756	12.4461	1.92107	15.0557	1.95704	9.51498	1.91449	12.96	1.32914
	29.0594	49.7127	2.42632	54.3714	5.01703	33.7013	3.78038	32.0442	4.35321			29.0594	27.0266	2.04367	28.8471	1.76883	16.9212	1.32892	17.3826	1.02865			29.0594	12.5929	1.9614	15.2052	1.98781	9.87081	2.02347	12.2876	1.21847
	30.4431	49.9414	2.43478	54.2581	5.2588	34.2187	3.83757	32.3536	4.30239			30.4431	27.1967	2.13682	28.8973	1.67055	17.0485	1.32651	17.5051	0.998278			30.4431	12.8292	2.02716	15.331	2.00952	10.1706	2.16873	11.8743	1.13246
	31.8269	50.0564	2.58956	54.5098	5.27349	34.5783	3.90595	32.3563	4.38423			31.8269	27.3767	2.17866	29.287	1.69122	17.4415	1.34522	17.4814	1.00649			31.8269	12.8026	1.93041	15.6524	2.02707	10.127	2.00363	11.751	1.23069
	33.2107	50.2243	2.64703	54.0129	5.02107	34.7309	3.93102	31.7812	4.35656			33.2107	27.7829	2.20924	29.7595	1.80862	17.8695	1.35614	17.7904	1.08247			33.2107	12.5647	1.93849	15.506	1.91672	9.80763	1.6299	11.839	1.31764
	34.5945	50.2684	2.78925	53.4918	4.65115	34.6393	3.95551	31.4516	4.23908			34.5945	28.0162	2.26191	29.8558	1.85866	18.2265	1.35441	18.0611	1.08199			34.5945	12.3818	1.9512	15.4712	1.9029	9.5219	1.40263	11.3685	1.21322
	35.9783	49.8799	2.54556	53.9315	4.56919	35.1549	4.00042	31.6737	4.31749			35.9783	28.2438	2.36733	30.0463	1.80582	18.5626	1.36926	18.0925	1.06277			35.9783	12.3491	1.9269	15.6637	1.92365	9.43549	1.3464	10.6986	1.00186
	37.362	49.771	2.31317	54.0886	4.74771	35.7221	4.01627	31.7293	4.39307			37.362	28.2715	2.40671	30.5401	1.90087	18.7322	1.38251	18.0982	1.05676			37.362	12.4215	1.90063	15.9008	2.00817	9.1508	1.25051	10.5213	0.965428
	38.7458	49.7695	2.76582	54.4223	4.79575	35.9712	3.99621	32.0271	4.29075			38.7458	28.1717	2.35884	30.378	1.84783	18.8934	1.37939	18.0478	1.02272			38.7458	12.5736	1.93959	15.9034	1.92294	8.98914	1.20829	10.4521	0.963036
	40.1296	50.2501	2.81794	54.1731	4.66048	35.9196	3.93442	31.9362	4.28261			40.1296	28.2767	2.31374	30.4321	1.89503	19.1176	1.37809	18.4133	1.10385			40.1296	12.6549	2.03234	16.1101	1.90638	9.05114	1.23165	10.3268	0.928356
	41.5134	50.0437	2.80584	53.9325	4.57554	35.8554	3.8932	32.1562	4.19021			41.5134	28.5373	2.32673	30.8056	2.02258	19.4493	1.35843	18.57	1.13137			41.5134	12.6721	2.03195	16.2934	1.9057	9.09039	1.19934	10.1117	0.826497
	42.8972	50.1649	2.69619	54.2277	4.51043	35.9929	4.0301	32.1062	4.16159			42.8972	28.4803	2.27792	30.9255	2.03131	19.6955	1.31596	18.6876	1.121			42.8972	12.8856	2.04333	16.1285	1.81648	9.15006	1.12461	10.0952	0.785137
	44.2809	49.9005	2.69764	54.5019	4.54903	36.4885	4.03017	32.0135	4.30243			44.2809	28.7401	2.29607	31.1139	1.96625	19.6617	1.27632	18.7719	1.12947			44.2809	13.3372	2.16033	16.2149	1.77983	9.33716	0.992333	10.2317	0.838886
	45.6647	49.6661	2.84086	54.2434	4.72318	36.5428	3.93815	31.6878	4.30138			45.6647	29.0262	2.38694	31.1895	2.00899	19.8395	1.28169	18.9266	1.15442			45.6647	13.2607	2.12858	16.5586	1.7957	9.46649	0.957993	10.2108	0.809928
	47.0485	49.7945	3.02087	54.2969	4.50036	36.3391	3.85003	31.7549	4.19883			47.0485	29.0774	2.39368	31.3846	2.01074	20.1636	1.30509	18.9569	1.17762			47.0485	13.47	2.16764	16.7338	1.73274	9.43857	1.09774	10.3737	0.901462
	48.4323	49.8636	3.13611	53.9168	4.33746	36.587	3.94681	32.041	4.20647			48.4323	29.106	2.35151	31.7288	1.94902	20.4706	1.32145	19.0487	1.21988			48.4323	13.719	2.10163	16.9365	1.68807	9.61067	1.0926	10.5867	0.881439
	49.8161	50.4184	3.17165	54.6717	4.54584	36.9946	3.9859	31.8812	4.23505			49.8161	29.027	2.40627	31.7907	1.90131	20.5339	1.32271	19.2723	1.29435			49.8161	13.8471	2.10412	17.3617	1.71584	9.67592	1.09593	10.625	0.871012
	51.1998	49.7005	3.17488	54.6939	4.51013	36.9555	3.93706	31.8862	4.22136			51.1998	29.2672	2.49771	31.8846	1.90113	20.7472	1.38214	19.5495	1.32993			51.1998	14.0686	2.1125	17.4737	1.61726	9.73677	1.17326	10.6809	0.910659
	52.5836	49.3574	2.89842	54.5263	4.48473	36.8314	4.04922	32.0491	4.25586			52.5836	29.455	2.51537	31.8429	1.8885	20.8798	1.34708	19.8041	1.28129			52.5836	14.229	2.11914	17.7543	1.66211	10.0337	1.16797	11.0376	0.997919
	53.9674	49.5035	2.90128	54.4343	4.36147	36.8401	4.18	32.2187	4.31319			53.9674	29.6135	2.61007	32.0672	1.92136	21.0088	1.31409	19.953	1.2934			53.9674	14.4387	2.15305	17.8736	1.64324	10.1652	1.10181	11.1978	0.962568
	55.3512	49.8294	2.92916	54.4524	4.42	36.8007	4.13594	32.0475	4.2766			55.3512	29.5015	2.60296	32.0047	1.87952	21.1724	1.35724	20.1121	1.35842			55.3512	14.6051	2.12874	17.8757	1.64164	10.1637	1.19219	11.2396	0.882564
	56.735	49.9468	3.00685	54.463	4.34486	36.7822	3.88956	31.8897	4.34387			56.735	29.5154	2.54566	32.0578	1.8479	21.386	1.38125	20.1344	1.35528			56.735	14.7966	2.12179	18.0932	1.66159	10.2548	1.29327	11.377	0.943718
	58.1187	49.8541	2.92011	54.1561	4.349	36.928	3.99351	32.3444	4.30079			58.1187	29.6574	2.52863	32.3144	1.9277	21.5096	1.32476	20.2244	1.38004			58.1187	15.0628	2.2436	18.4278	1.64345	10.4361	1.21365	11.6439	1.00027
	59.5025	50.0235	2.92556	54.0872	4.46379	36.9369	4.27725	32.4699	4.24924			59.5025	30.0381	2.57016	32.622	2.04523	21.6689	1.32097	20.3494	1.3663			59.5025	15.356	2.27719	18.4987	1.63703	10.5085	1.1737	11.8833	0.939359
	60.8863	50.0082	3.01762	54.0856	4.3711	36.7764	4.37648	32.4111	4.27881			60.8863	29.8441	2.51989	32.8848	2.08384	21.8473	1.34139	20.4383	1.41054			60.8863	15.8439	2.37665	18.8779	1.6313	10.4278	1.26159	12.0143	0.79353
	62.2701	50.178	3.02241	54.001	4.28298	36.9649	4.33626	32.4452	4.26136			62.2701	30.0733	2.64646	32.8674	2.02414	21.9073	1.34527	20.6861	1.54147			62.2701	15.9735	2.28631	18.9669	1.55929	10.6442	1.28669	12.4488	0.794556
	63.6538	49.7676	3.04441	54.1179	4.08182	37.0688	4.36612	32.3729	4.24292			63.6538	30.0481	2.69843	32.8294	2.04061	22.1174	1.40293	20.7291	1.52332			63.6538	16.1493	2.2834	19.09	1.57744	10.9659	1.25136	12.9339	0.903002
	65.0376	49.6139	2.79598	54.0388	4.07834	36.7787	4.33578	32.2428	4.28336			65.0376	30.0157	2.6109	33.1718	2.08027	22.2421	1.38511	20.8463	1.54172			65.0376	16.4466	2.3514	19.3451	1.58956	11.1007	1.23047	13.0926	0.859542
	66.4214	50.0325	2.89891	53.7169	4.06981	36.8917	4.34343	31.998	4.33822			66.4214	30.4583	2.63701	33.3429	2.13174	22.3646	1.3588	20.9226	1.54226			66.4214	16.6465	2.32016	19.5259	1.58526	11.1473	1.22589	13.1581	0.758909
	67.8052	49.9418	3.04647	54.4534	4.19188	37.2632	4.32493	32.1531	4.31723			67.8052	30.3178	2.62802	33.3911	2.14561	22.5532	1.36066	21.0556	1.53807			67.8052	17.0185	2.28009	19.9542	1.64768	11.3889	1.2499	13.6432	0.855753
	69.189	49.5642	2.99121	54.3804	4.25587	37.3473	4.33436	32.0799	4.23515			69.189	30.2816	2.61259	33.4919	2.02759	22.6199	1.37154	21.2141	1.57294			69.189	17.1376	2.25764	20.3275	1.64837	11.7869	1.31491	13.835	0.868389
	70.5727	49.9574	2.84396	53.8504	4.26806	37.1665	4.47062	31.9272	4.2206			70.5727	30.4067	2.65355	33.6768	2.0375	22.5935	1.37519	21.3299	1.62368			70.5727	17.4625	2.35163	20.5707	1.68698	12.0143	1.27344	14.101	0.874363
	71.9565	49.922	2.75048	54.4553	4.31769	37.0869	4.45574	32.3044	4.33443			71.9565	30.4724	2.73573	33.7841	2.24743	22.672	1.36102	21.2729	1.67204			71.9565	17.6721	2.44116	20.7419	1.74101	12.2227	1.31301	14.2533	0.857618
	73.3403	49.9073	3.1696	54.6939	4.30737	36.8608	4.47781	32.2446	4.27507			73.3403	30.5337	2.74189	33.888	2.19873	22.627	1.41297	21.2138	1.63026			73.3403	17.8823	2.55358	20.8796	1.79695	12.199	1.40373	14.4704	0.837864
	74.7241	49.5808	2.89387	54.5045	4.32831	36.7532	4.59994	31.7845	4.21391			74.7241	30.6024	2.77699	34.0392	2.17626	22.6793	1.43917	21.372	1.67865			74.7241	18.1614	2.48	21.3342	1.82344	12.4024	1.37349	14.6099	0.858304
	76.1079	49.2163	2.98343	54.425	4.25838	36.7892	4.52763	32.1139	4.33402			76.1079	30.7513	2.81119	34.0848	2.18738	22.9152	1.46022	21.6008	1.74879			76.1079	18.4944	2.4286	21.6326	1.78056	12.7315	1.32809	14.8416	0.850038
	77.4916	49.2415	3.06252	54.3757	4.32325	37.1962	4.49279	32.4373	4.30315			77.4916	30.7165	2.75423	34.1608	2.21426	23.0852	1.4624	21.6865	1.72096			77.4916	18.6633	2.41526	21.5219	1.76691	12.8089	1.29007	15.0669	0.845465
	78.8754	49.2897	2.94577	54.2867	4.1905	37.1587	4.63085	32.6856	4.33717			78.8754	30.8915	2.763	34.4847	2.37089	23.0632	1.45447	21.6691	1.71672			78.8754	18.5172	2.31298	21.8567	1.83826	13.0855	1.22831	15.2947	0.875681
	80.2592	49.6321	2.94604	55.1507	4.24663	36.815	4.5267	32.6872	4.27821			80.2592	30.7956	2.73812	34.5054	2.39105	22.9818	1.4457	21.6747	1.78946			80.2592	18.4234	2.30968	22.1987	1.84857	13.2551	1.203	15.7217	1.01334
	81.643	49.9317	3.04067	55.2985	4.32352	36.9371	4.65532	32.5103	4.17122			81.643	30.8154	2.80965	34.6448	2.3127	23.0529	1.47061	21.7356	1.79499			81.643	18.4009	2.23964	22.1921	1.82797	13.4045	1.27664	16.1986	1.24554
	83.0268	50.0325	3.18436	55.0658	4.56283	37.1268	4.84962	32.6103	4.2869			83.0268	31.1891	2.87123	34.8698	2.39137	23.1871	1.48273	21.5878	1.76547			83.0268	18.5237	2.17098	22.5706	1.82105	13.7271	1.28502	16.7796	1.34644
	84.4105	49.7294	3.25351	55.0006	4.54682	37.2015	4.66483	32.4306	4.4208			84.4105	30.9951	2.82955	34.9615	2.3967	23.336	1.43749	21.7815	1.83019			84.4105	18.7656	2.19824	22.8798	1.76785	14.1258	1.21002	16.9688	1.27101
	85.7943	49.4552	3.10495	55.2856	4.49723	36.8871	4.52389	32.4343	4.3494			85.7943	31.112	2.84642	35.1778	2.43691	23.3089	1.4149	21.9794	1.89615			85.7943	19.091	2.35125	22.994	1.78999	14.4822	1.15176	17.2587	1.32149
	87.1781	49.802	3.20156	55.5351	4.45376	36.897	4.47134	32.4879	4.38479			87.1781	31.3877	2.91198	35.3035	2.49446	23.3236	1.45188	22.063	1.82434			87.1781	19.3624	2.38927	23.0503	1.76252	14.7622	1.16207	17.4821	1.39991
	88.5619	49.98	2.99292	55.398	4.70862	36.9712	4.42295	32.2328	4.29739			88.5619	31.5833	3.0022	35.3181	2.55817	23.2548	1.43154	22.1473	1.84684			88.5619	19.5575	2.27887	23.2212	1.74254	14.9466	1.22093	17.4938	1.22481
	89.9457	50.0181	2.95346	55.0494	4.86506	36.775	4.591	32.2152	4.28897			89.9457	31.6164	2.90571	35.4746	2.59563	23.4756	1.43652	22.1099	1.93083			89.9457	19.974	2.30592	23.4055	1.87359	15.1731	1.30697	17.5216	1.15102
	91.3294	49.8574	3.08328	54.9193	4.91948	36.5658	4.57391	32.5621	4.28291			91.3294	31.4193	2.85275	35.7416	2.7152	23.6154	1.44856	22.0248	1.89812			91.3294	20.469	2.37455	23.4671	1.92402	15.3513	1.30205	17.7839	1.17525
	92.7132	49.7876	2.89876	55.225	4.79235	36.7723	4.51094	32.3225	4.29211			92.7132	31.7465	2.95699	35.8658	2.73385	23.612	1.42932	21.8878	1.90368			92.7132	20.5282	2.38469	23.5481	1.97153	15.6856	1.26903	17.8039	1.10793
	94.097	50.1796	3.10534	55.8153	4.49809	36.8335	4.5597	32.3349	4.29514			94.097	31.6286	2.8481	35.6777	2.74228	23.5118	1.41371	21.9234	1.93361			94.097	20.8154	2.48677	23.7829	2.16991	15.884	1.35859	17.8039	1.05753
	95.4808	50.2887	3.27627	55.9323	4.61374	36.777	4.53222	32.3827	4.31425			95.4808	31.7078	2.8179	35.6305	2.73413	23.5456	1.45609	21.9194	1.91492			95.4808	20.9608	2.41606	23.848	2.25868	15.9256	1.36826	18.0112	1.01665
	96.8646	50.2742	3.05251	56.1922	4.87792	36.985	4.47489	32.2462	4.32767			96.8646	31.9233	2.94827	35.8719	2.74963	23.596	1.50593	22.051	1.9351			96.8646	20.8817	2.26151	23.7331	2.17285	15.9103	1.41272	18.2112	1.09119
	98.2483	50.3488	3.08646	56.0788	4.81599	37.246	4.45838	31.9929	4.29085			98.2483	31.9541	2.95016	36.2646	2.8991	23.6546	1.51153	22.0362	1.98091			98.2483	20.8454	2.21371	23.8466	2.09406	16.0351	1.46142	18.4087	1.1246
	99.6321	50.321	3.08103	56.1423	4.39954	37.1091	4.49945	32.0748	4.28064			99.6321	31.9766	2.84269	36.4095	2.85817	23.738	1.52361	22.0088	2.00897			99.6321	21.0695	2.29493	24.1239	2.19797	16.3088	1.4674	18.5985	1.14502
	101.016	50.3865	2.8598	55.4976	4.29729	36.7263	4.45829	32.4523	4.33191			101.016	31.8685	2.79037	36.2731	2.70391	23.6377	1.49139	21.9926	1.96147			101.016	21.4449	2.29723	24.6778	2.42614	16.4828	1.42052	18.9332	1.22759
	102.4	50.7738	3.0515	55.1152	4.2772	36.4844	4.40082	32.3987	4.31676			102.4	31.9014	2.77968	36.2183	2.60601	23.5431	1.46189	21.9998	1.99088			102.4	21.5594	2.25634	25.0043	2.538	16.6495	1.40347	19.2507	1.32687
	103.783	50.7826	3.10048	55.2983	4.55963	36.3319	4.54636	32.1699	4.3149			103.783	31.9146	2.81654	36.2781	2.67786	23.581	1.4823	22.1081	2.04535			103.783	21.7119	2.23132	25.0929	2.45614	16.9666	1.33232	19.3543	1.29378
	105.167	51.1489	3.10579	55.9109	4.75205	36.4315	4.52363	32.3951	4.25254			105.167	31.8643	2.86891	36.1448	2.57502	23.5589	1.46514	22.0251	2.02084			105.167	21.7707	2.21219	25.4862	2.47236	16.8263	1.3773	19.6842	1.30547
	106.551	51.3649	3.14829	55.7612	4.55877	36.5316	4.38151	32.2629	4.27161			106.551	31.8786	2.85161	36.2406	2.55938	23.6673	1.45223	22.047	2.03473			106.551	22.1784	2.39109	26.0688	2.47663	16.8764	1.35599	19.7923	1.25686
	107.935	51.244	3.1047	55.5923	4.5656	36.5964	4.34306	32.3948	4.28924			107.935	31.9865	2.76492	35.8771	2.48012	23.7546	1.5036	22.1603	2.09604			107.935	22.5307	2.37188	26.2529	2.42422	17.0814	1.26706	20.2345	1.29164
	109.319	50.5458	3.2677	55.9944	4.74755	36.8094	4.44704	32.2959	4.2179			109.319	32.046	2.718	35.7375	2.44722	23.7998	1.5193	22.0405	2.04685			109.319	22.6559	2.31018	25.9975	2.37403	17.3399	1.33598	20.3729	1.2985
	110.702	50.6825	3.22703	56.062	4.48277	36.5557	4.44951	32.2163	4.27985			110.702	31.9315	2.78027	36.0145	2.48993	23.7606	1.51644	22.0747	2.0213			110.702	22.6562	2.41035	25.7047	2.24279	17.6235	1.43295	20.4325	1.27418
	112.086	51.4086	3.18112	55.7425	4.29881	36.1429	4.36311	32.5082	4.337			112.086	32.0567	2.77406	36.2443	2.64225	23.7338	1.55651	22.2584	2.0337			112.086	22.769	2.46194	25.6139	2.14445	17.9406	1.47122	20.6947	1.25007
	113.47	51.2941	3.32008	55.9052	4.15183	36.3645	4.38235	32.6725	4.28078			113.47	32.1495	2.79514	36.2625	2.57773	23.9365	1.53275	22.1873	2.04844			113.47	23.0052	2.4537	26.0081	2.11682	18.2216	1.39146	20.9112	1.28762
	114.854	50.6273	3.14201	55.7963	4.06335	36.5143	4.36316	32.6566	4.28223			114.854	32.2813	2.88655	36.0535	2.42604	23.9087	1.5176	22.0806	2.02512			114.854	22.8824	2.39391	26.2081	2.10068	18.6377	1.38273	20.8233	1.311
	116.237	50.9878	3.14141	56.3091	4.3569	36.3662	4.24453	32.3338	4.29062			116.237	32.272	2.84808	36.199	2.61812	23.9331	1.60366	22.2715	2.02749			116.237	22.8865	2.44258	26.1799	2.15022	18.7698	1.44397	21.345	1.22302
	117.621	51.1501	3.26342	56.853	4.39284	36.4681	4.22659	32.3017	4.18323			117.621	32.2209	2.84246	36.6082	2.62235	24.0041	1.59226	22.2704	2.05364			117.621	23.1292	2.4578	26.1551	2.25628	19.0547	1.40377	21.8901	1.31303
	119.005	51.0819	3.38472	56.366	4.41623	36.3441	4.32754	32.6271	4.22293			119.005	32.2825	2.807	36.5936	2.55305	24.0805	1.53275	22.2844	2.01364			119.005	23.1765	2.56762	26.0672	2.31256	19.2981	1.2565	21.9636	1.34479
	120.389	50.79	3.28495	56.6282	4.45727	36.1772	4.25427	32.6152	4.23754			120.389	32.2959	2.78574	36.5976	2.65324	24.0447	1.4593	22.4445	2.01925			120.389	23.1531	2.62401	26.4337	2.42311	19.2063	1.30281	21.6059	1.16998
	121.773	50.5078	3.27257	57.8061	4.49955	36.2432	4.18702	32.4239	4.20049			121.773	32.4078	2.8711	36.5833	2.62615	23.868	1.40935	22.4663	2.08218			121.773	23.1198	2.49846	26.7149	2.49547	19.3141	1.42461	21.6287	1.18437
	123.156	51.1723	3.14319	57.5088	4.61938	36.5038	4.21296	32.6013	4.16638			123.156	32.4812	2.89437	36.8369	2.63725	23.9756	1.49449	22.6324	2.12174			123.156	23.3726	2.49409	26.7641	2.49454	19.4929	1.42677	22.0987	1.19558
	124.54	51.5475	3.09669	57.0248	4.71649	36.4976	4.32342	32.6274	4.1723			124.54	32.5148	2.81339	36.6953	2.59077	24.1149	1.53376	22.7536	2.08353			124.54	23.6017	2.56148	26.8179	2.40472	19.5823	1.40353	21.9927	1.22925
	125.924	51.0425	3.19155	57.2893	4.73469	36.5247	4.31389	32.6369	4.12188			125.924	32.3809	2.85359	36.5924	2.58698	24.1235	1.58155	22.7813	2.09036			125.924	23.6765	2.65171	27.0291	2.35636	19.7803	1.42152	21.8028	1.14516
	127.308	51.179	3.17326	57.4563	4.728	36.4562	4.19945	32.7663	4.16709			127.308	32.5911	2.90563	36.5247	2.5311	24.0579	1.59259	22.7298	2.06751			127.308	23.8533	2.66938	27.4259	2.31458	19.9777	1.46471	22.0037	1.14907
	128.691	51.2487	3.06941	56.9713	4.6804	36.5135	4.14592	32.7604	4.27253			128.691	32.6289	2.91045	36.4159	2.45663	23.9981	1.54534	22.7964	2.08158			128.691	23.9452	2.56145	27.6542	2.36156	20.0949	1.46262	22.3253	1.25559
	130.075	51.248	3.11302	57.4237	4.58755	36.6379	4.09451	32.6099	4.1806			130.075	32.672	2.91999	36.7726	2.49244	24.0337	1.52557	22.8108	2.05982			130.075	24.0317	2.48876	27.6843	2.38777	20.1039	1.3779	22.0199	1.16066
	131.459	51.5026	3.06595	58.03	4.79493	36.4418	4.02714	32.6817	3.87473			131.459	32.7033	2.87795	36.9125	2.47396	24.1474	1.50443	22.6767	2.04083			131.459	24.0661	2.48464	27.4841	2.2336	20.0914	1.38822	21.9656	1.05486
	132.843	51.6161	3.16224	58.3447	4.88736	36.5601	4.0666	32.6664	3.95161			132.843	32.7224	2.81856	36.9621	2.4443	24.337	1.53403	22.7734	2.01492			132.843	23.9988	2.43792	27.244	2.1753	20.3829	1.38454	22.364	1.06545
	134.227	51.6462	3.05974	58.4777	4.89495	36.4081	4.07602	32.3607	4.0508			134.227	32.847	2.75647	37.0391	2.40627	24.2691	1.52833	22.9723	2.06949			134.227	23.9001	2.43605	27.417	2.31182	20.5891	1.35806	22.6655	1.0901
	135.61	51.1404	3.0357	58.5315	4.97532	36.524	3.93098	32.4053	4.05462			135.61	32.7748	2.71008	36.8545	2.31101	24.1846	1.46469	23.0732	2.08654			135.61	23.9844	2.51134	27.4503	2.1936	21.0686	1.29069	23.0854	1.19003
	136.994	51.2797	2.8305	58.3195	5.11131	36.5889	3.79673	32.3937	4.00516			136.994	33.0397	2.78541	36.9344	2.33344	24.226	1.45171	23.0283	2.03081			136.994	24.0394	2.49515	27.2132	2.09456	21.1304	1.41778	23.0263	1.26034
	138.378	52.3101	2.90922	58.3064	5.04553	36.4112	3.8787	32.6943	4.02317			138.378	33.3959	2.90359	37.1922	2.3465	24.219	1.45446	22.9612	2.01023			138.378	24.0688	2.5023	27.0891	2.17509	21.2421	1.56267	23.1702	1.23945
	139.762	52.5497	3.03659	58.9882	4.95731	36.5504	3.92425	32.758	3.93044			139.762	33.7741	3.02849	37.6154	2.37617	24.3111	1.46777	23.1804	2.06581			139.762	24.0285	2.48033	27.5723	2.20891	21.5123	1.52028	23.4562	1.27588
	141.145	52.1148	3.01902	59.383	5.21907	36.3739	3.852	32.6028	4.02058			141.145	33.8399	3.08409	37.8673	2.42193	24.509	1.56856	23.1438	2.07126			141.145	24.0534	2.49758	27.9763	2.29238	21.5606	1.49748	23.5314	1.1951
	142.529	52.524	3.1587	59.0864	5.22119	36.0995	3.80188	32.9844	4.04787			142.529	33.8088	3.05978	37.6229	2.3493	24.3573	1.50026	22.9792	1.97828			142.529	24.2099	2.56555	27.8924	2.35284	21.4769	1.59248	23.5052	1.12953
	143.913	52.7685	2.97808	59.3414	5.17303	36.0469	3.80727	33.1566	4.1075			143.913	33.8579	2.98829	37.5317	2.25455	24.3369	1.45367	23.0664	1.90258			143.913	24.444	2.53129	27.8896	2.36448	21.5949	1.64248	23.5679	1.20556
	145.297	52.9589	3.1643	59.1101	4.95871	36.4727	3.88815	33.1759	4.06315			145.297	33.8782	2.99839	37.6809	2.24316	24.43	1.46391	23.2499	1.96842			145.297	24.841	2.55412	28.0404	2.46842	21.8042	1.6375	23.7553	1.24287
	146.681	53.4145	2.95844	59.6011	4.88019	36.6045	3.92143	32.7235	3.96088			146.681	34.1377	3.10762	37.7887	2.2416	24.3463	1.44816	23.2838	2.03614			146.681	25.0254	2.60324	28.0209	2.5993	21.9609	1.70705	23.7033	1.04332
	148.064	53.5137	3.07125	59.8724	5.11597	36.4807	3.92576	33.1289	3.93349			148.064	34.5749	3.16875	38.0479	2.40298	24.3292	1.44445	23.3152	2.03637			148.064	24.9696	2.5615	28.1651	2.5076	22.4637	1.75856	24.155	1.11903
	149.448	54.039	3.11724	60.1887	5.19646	36.6474	3.8786	33.5755	3.9396			149.448	34.602	3.15562	38.0608	2.37251	24.4018	1.44012	23.4441	2.04979			149.448	25.3688	2.68775	28.2892	2.50331	22.6936	1.66944	24.3461	1.03658
	150.832	53.5212	2.95823	60.1224	5.22086	36.7285	3.79072	33.2565	3.82555			150.832	34.6163	3.18051	38.0542	2.35388	24.5538	1.44417	23.506	2.02917			150.832	25.8304	2.80521	28.3236	2.78496	22.7422	1.66297	24.1421	0.950047
	152.216	53.6869	2.90827	60.173	5.32785	36.5946	3.82666	33.3951	3.91383			152.216	34.8829	3.12274	38.2922	2.55387	24.588	1.41429	23.4187	1.95097			152.216	26.057	2.76001	28.323	2.77804	22.8473	1.72945	24.1817	1.16193
	153.6	54.2468	3.06685	60.3467	5.18571	36.4493	3.77113	33.312	4.09274			153.6	34.9228	3.10101	38.6035	2.60925	24.5409	1.44524	23.3996	1.99402			153.6	25.9344	2.6985	28.5438	2.61975	23.0012	1.64702	24.2504	1.12804
	154.983	54.3026	3.00467	60.7434	5.24047	36.5197	3.74131	33.2025	3.9732			154.983	35.0351	3.15612	38.7854	2.67526	24.3417	1.45512	23.4182	2.01679			154.983	25.9907	2.69193	28.2701	2.50357	23.0237	1.63268	24.4152	1.11052
	156.367	54.2125	2.95211	60.7468	5.13691	36.817	3.82217	33.1038	3.93091			156.367	35.0832	3.10566	38.7734	2.59968	24.5028	1.4774	23.4454	2.05332			156.367	26.2547	2.78558	28.2604	2.46349	22.8965	1.61879	24.3865	1.22499
	157.751	54.5852	3.0769	60.7748	5.44204	36.7466	3.7997	32.8379	3.98705			157.751	35.0995	2.96749	39.0507	2.67283	24.7574	1.51133	23.3531	2.10774			157.751	26.4378	2.77977	28.8451	2.59255	22.7987	1.54971	24.2282	1.14229
	159.135	54.6545	2.96697	61.7285	5.69499	36.6496	3.7965	32.9891	4.07305			159.135	34.9916	2.95581	39.5581	2.8249	24.5351	1.47565	23.3158	2.11754			159.135	26.4941	2.76934	29.0732	2.64491	23.0106	1.54111	24.268	1.21296
	160.518	54.6327	3.0176	62.0029	5.654	36.2804	3.88319	33.1165	4.06607			160.518	35.3514	2.9586	39.657	2.8276	24.5822	1.42889	23.4032	2.09428			160.518	26.403	2.73382	29.4128	2.73456	23.4719	1.61446	24.4486	1.32694
	161.902	54.4436	3.07945	61.9597	5.46388	36.2375	3.90391	32.8889	4.07131			161.902	35.295	2.90324	39.2249	2.64753	24.7125	1.44647	23.3732	2.02922			161.902	26.6274	2.65274	29.4743	2.81321	23.7838	1.65584	24.4166	1.20895
	163.286	54.8987	3.2582	61.2008	5.1238	36.4133	3.64522	33.0748	4.05324			163.286	35.3311	2.96233	39.0559	2.73735	24.4762	1.39068	23.3922	2.05847			163.286	27.0964	2.71477	29.2884	2.91698	23.5334	1.67346	24.6892	1.18263
	164.67	55.3908	3.49074	61.1958	5.18444	36.7064	3.53052	33.1866	4.18921			164.67	35.8335	3.08708	39.3014	2.87971	24.5641	1.43364	23.5758	2.11217			164.67	27.2534	2.68521	29.3808	2.97234	23.1853	1.76462	25.0176	1.25757
	166.054	55.5714	3.29248	61.8496	5.44257	36.2515	3.53298	33.2945	4.19535			166.054	35.8423	2.9898	39.5738	3.00493	24.6518	1.37757	23.6319	2.17383			166.054	27.1214	2.49166	29.2785	2.90253	22.9306	1.7097	25.0195	1.27099
	167.437	56.2319	3.1789	62.4738	5.45968	36.4293	3.60878	33.4	4.14346			167.437	35.9821	2.95113	39.7747	3.07125	24.6226	1.38509	23.7386	2.18559			167.437	27.1949	2.41834	29.4193	2.93479	22.93	1.65002	25.1619	1.15244
	168.821	56.7882	3.19683	62.83	5.60849	36.3732	3.49553	33.4218	4.0744			168.821	35.871	2.92157	40.2493	3.18467	24.6843	1.4474	23.5607	2.11677			168.821	27.163	2.45237	29.3804	2.83726	23.3886	1.63378	25.1876	1.04941
	170.205	56.8042	3.43142	63.4932	5.70372	36.4991	3.52464	33.2443	4.05305			170.205	35.9466	2.97637	40.5914	3.26681	24.6855	1.43762	23.6652	2.16609			170.205	27.006	2.55717	29.2587	2.64624	23.7328	1.58519	25.2613	1.07838
	171.589	56.7959	3.45135	63.5331	5.60711	36.5576	3.5118	33.5197	4.16839			171.589	36.3295	2.9835	40.2423	3.18085	24.6818	1.38954	23.805	2.24574			171.589	26.8325	2.57816	29.637	2.77383	24.0957	1.65348	25.4455	1.26682
	172.972	56.6818	3.59405	63.4568	5.51835	36.4521	3.37406	33.6504	4.19268			172.972	36.412	3.03301	40.4149	3.21513	24.8266	1.35627	23.6586	2.24971			172.972	26.669	2.60178	29.9017	2.86498	24.1819	1.69608	25.3465	1.22798
	174.356	56.5585	3.6683	63.7231	5.52866	36.6961	3.41111	33.7848	4.03194			174.356	36.3373	3.09593	40.5992	3.26829	24.8445	1.36951	23.687	2.23196			174.356	26.9331	2.74985	29.8968	2.75054	24.4114	1.68324	25.3871	1.13519
	175.74	57.0594	3.52947	64.0905	5.70275	36.6246	3.53835	33.7654	4.08506			175.74	36.3726	3.03413	40.6364	3.35141	24.7785	1.35885	23.8713	2.23435			175.74	27.1014	2.94416	30.2678	2.74638	24.6997	1.63139	26.0689	1.19086
	177.124	57.4049	3.77557	64.1765	5.61596	36.6401	3.53341	33.7393	4.07128			177.124	36.4681	2.94112	40.7594	3.40845	24.944	1.39173	23.8906	2.25835			177.124	27.3958	2.99638	30.4396	2.71077	24.8601	1.68486	26.5437	1.17663
	178.508	57.7622	4.11543	64.3929	5.64809	36.7669	3.4388	34.0741	4.03822			178.508	36.5069	2.92536	40.6336	3.43351	24.8901	1.36287	23.955	2.23993			178.508	27.7275	3.07877	29.9028	2.64327	24.9841	1.78086	26.4714	1.17357
	179.891	58.6135	4.14933	64.5744	5.67066	36.6146	3.42359	34.1666	4.06901			179.891	36.7603	2.89124	40.5096	3.55763	24.9938	1.37795	24.0342	2.22292			179.891	28.1392	2.90419	29.6533	2.66593	25.1955	1.7237	26.5085	1.24262
	181.275	58.9946	4.18142	64.342	5.69974	37.2523	3.2793	34.2066	4.05505			181.275	37.009	2.87155	40.5441	3.57245	25.1659	1.40935	24.0658	2.19707			181.275	28.953	2.91701	29.6082	2.6651	25.2647	1.6383	26.5903	1.27554
	182.659	58.9155	4.45328	64.7935	5.89505	37.474	3.2621	34.5316	4.21601			182.659	37.0423	2.96019	40.8958	3.61231	25.0648	1.36292	24.1029	2.20744			182.659	29.0986	2.87568	29.7625	2.55614	25.1258	1.61854	26.4369	1.21373
	184.043	59.3613	4.89548	65.3142	6.04941	37.1027	3.31187	34.6712	4.32285			184.043	36.9046	2.94598	40.8417	3.52626	25.1079	1.3698	24.1384	2.22983			184.043	29.2283	2.7064	29.8444	2.57032	25.3538	1.65938	26.469	1.20323
	185.426	59.9901	4.92012	65.2501	6.04391	37.021	3.25701	34.6262	4.15018			185.426	37.1387	2.95446	40.7988	3.56897	25.3345	1.40619	24.0924	2.22997			185.426	29.3117	2.70144	29.8792	2.65131	25.448	1.69756	26.968	1.315
	186.81	60.0869	5.07357	65.4697	6.2876	37.3883	3.33684	34.6465	4.19176			186.81	36.9198	3.00459	40.9685	3.75775	25.3861	1.38671	24.0285	2.22162			186.81	29.2382	2.61109	29.8273	2.5565	25.1806	1.59512	26.7308	1.2647
	188.194	61.1264	5.33173	65.6193	6.61308	37.7916	3.27233	34.8702	4.21713			188.194	36.9236	2.91818	40.9994	3.7094	25.2719	1.35627	24.2633	2.25424			188.194	28.4976	2.5543	29.7922	2.50946	25.5148	1.58522	26.3586	1.21921
	189.578	61.119	5.19882	65.4265	6.55894	37.8404	3.19674	34.998	4.07436			189.578	36.9378	2.83813	40.9621	3.61935	25.2886	1.32722	24.3104	2.24615			189.578	28.3912	2.58863	29.8135	2.50334	25.7766	1.45938	26.5812	1.26884
	190.962	61.2784	5.19113	65.7851	6.1241	37.892	3.26094	35.188	4.09777			190.962	36.958	2.91379	41.1962	3.59101	25.3301	1.32786	24.4278	2.23393			190.962	28.2578	2.64401	29.3821	2.59006	25.8977	1.36641	26.9222	1.23507
	192.345	61.8779	5.34559	66.372	6.20492	37.6235	3.34473	35.371	4.07311			192.345	36.9693	2.96083	41.3488	3.57005	25.4317	1.3059	24.5495	2.26637			192.345	27.9809	2.74822	29.6196	2.73908	26.0545	1.36951	27.1943	1.10955
	193.729	62.0606	5.34905	67.2478	6.60054	37.9231	3.29312	35.1744	4.03267			193.729	36.9671	2.84734	41.2534	3.53849	25.5767	1.29502	24.486	2.30326			193.729	27.7488	2.77122	30.0932	2.92378	26.1215	1.38743	27.0609	1.00347
	195.113	62.136	5.08841	67.9189	6.59999	38.5009	3.30079	35.5517	3.99067			195.113	36.9916	2.74201	41.8529	3.78017	25.585	1.31647	24.6353	2.30269			195.113	27.4252	2.68546	30.2015	2.92282	26.209	1.37834	27.2975	0.964506
	196.497	61.7234	4.98981	68.394	6.62919	38.8949	3.35398	35.8321	4.16354			196.497	37.1759	2.79967	42.1671	3.91912	25.5082	1.35932	24.6967	2.23782			196.497	27.4112	2.65868	30.4459	3.01283	26.3654	1.32029	27.5206	1.11244
	197.88	62.5923	4.90606	68.9568	6.32667	38.9685	3.43361	36.2536	4.14611			197.88	37.1718	2.82546	42.0447	3.77506	25.5529	1.37701	24.6409	2.21627			197.88	27.7313	2.7694	30.4571	3.01574	26.2954	1.31745	27.3202	1.07924
	199.264	62.3667	4.80864	68.8717	6.33312	38.8602	3.41052	36.0877	4.14484			199.264	37.1867	3.02005	41.7819	3.61259	25.6364	1.34478	24.8769	2.30088			199.264	28.1079	2.84209	30.5976	3.02589	26.0456	1.31016	27.1326	0.872419
	200.648	62.0204	4.88537	69.0911	6.4921	38.8128	3.35814	35.9917	4.10547			200.648	37.4412	3.18225	41.6595	3.47081	25.6071	1.30341	24.791	2.26002			200.648	28.2281	2.81226	30.5439	3.01596	26.3921	1.37398	27.3127	0.862599
	202.032	63.5478	5.18667	69.5825	6.40065	39.3641	3.41388	36.3127	3.99721			202.032	37.7321	3.07517	42.0264	3.49679	25.6853	1.31756	24.8341	2.26357			202.032	28.3549	2.77196	30.6625	3.05131	26.5716	1.46002	27.4659	0.962945
	203.416	64.1967	5.09581	69.9068	6.19706	39.729	3.36938	36.8155	3.97202			203.416	37.5511	2.97733	42.5213	3.68626	25.9399	1.35905	24.8031	2.21142			203.416	28.3527	2.6656	30.6905	3.0357	26.6052	1.4527	27.4385	1.151
	204.799	63.8849	5.2183	70.1505	6.29515	39.9508	3.37436	37.0373	3.9627			204.799	37.2985	2.9128	42.7127	3.80838	26.0323	1.39633	24.8992	2.20416			204.799	28.2809	2.65099	31.0816	3.05866	26.7184	1.43363	27.5662	1.33512
	206.183	63.6315	5.32172	70.3163	6.32985	40.3172	3.3837	37.1561	3.78468			206.183	37.5844	2.87198	42.7106	3.639	26.0516	1.40612	25.1315	2.2248			206.183	27.9953	2.60664	31.437	3.04482	26.7418	1.44427	27.9354	1.33532
	207.567	64.2404	5.12138	70.8764	6.30485	40.3213	3.32424	37.176	3.84154			207.567	37.8561	3.03341	42.5758	3.60465	26.1436	1.34825	25.0641	2.21047			207.567	28.0122	2.60832	31.4283	2.99235	26.7451	1.4415	28.1972	1.31899
	208.951	64.7903	5.21027	70.5638	6.28975	40.1229	3.27009	37.4158	4.01909			208.951	37.8207	3.14244	42.3821	3.58679	26.1717	1.28093	25.2591	2.26739			208.951	28.2878	2.58576	31.5029	2.94356	26.5184	1.41782	28.3454	1.24783
	210.334	65.016	5.47739	70.693	6.08187	40.2244	3.35028	38.1185	3.99097			210.334	38.0576	3.26993	42.6332	3.53268	26.0895	1.34757	25.2903	2.30276			210.334	28.4164	2.53566	31.4337	2.85151	26.6831	1.40417	28.2878	1.21791
	211.718	65.4777	5.33418	71.3862	6.25969	40.5418	3.37937	37.95	4.05358			211.718	38.1199	3.16858	42.7383	3.53432	25.8967	1.33223	25.1383	2.27931			211.718	28.1614	2.40208	31.6318	2.91919	26.9155	1.43334	28.0563	1.31535
	213.102	65.9223	5.48867	71.801	6.46882	40.7043	3.2868	37.6363	4.13825			213.102	37.9081	3.08529	42.7178	3.62463	25.9666	1.27315	25.0808	2.31306			213.102	28.3458	2.48628	32.1595	2.90567	27.0348	1.54381	28.4538	1.66646
	214.486	66.6498	5.18833	71.994	6.39141	40.6099	3.33318	38.3338	4.11657			214.486	38.1152	3.21701	42.8073	3.71455	25.9934	1.27864	25.2257	2.35679			214.486	28.2823	2.4556	32.4015	3.04704	27.1774	1.56168	28.0401	1.55845
	215.87	66.6477	5.12488	72.0451	6.31505	40.688	3.37504	38.3685	4.06249			215.87	37.8573	3.32586	42.7108	3.6554	25.9199	1.27771	25.245	2.37021			215.87	28.3755	2.42335	32.3995	3.16994	27.1949	1.50763	27.8446	1.34969
	217.253	66.1846	5.37527	72.6828	6.50488	40.9325	3.3553	38.2098	3.91143			217.253	38.0833	3.3478	42.6812	3.73373	25.9086	1.27417	25.2396	2.31037			217.253	28.5006	2.47623	32.5973	3.00241	27.1953	1.5012	27.8158	1.28588
	218.637	67.3025	5.47361	72.6277	6.44497	40.9036	3.33819	38.5566	3.98276			218.637	38.2466	3.29653	42.6846	3.69526	25.9703	1.29288	25.3309	2.29995			218.637	28.5789	2.55953	32.0351	2.83238	27.4065	1.4556	27.9942	1.43582
	220.021	67.9896	5.59507	72.6067	6.25066	40.9159	3.35151	38.5902	3.93753			220.021	38.5986	3.37898	42.3708	3.50962	26.0495	1.30341	25.3423	2.42037			220.021	29.1227	2.80042	31.6827	2.77298	27.7497	1.47967	28.0672	1.56452
	221.405	68.8125	5.93303	73.0085	6.55154	41.3636	3.42804	38.5924	3.83901			221.405	39.0666	3.52265	42.4925	3.50175	25.9922	1.24295	25.3077	2.41564			221.405	29.4583	2.8613	31.9865	2.79188	28.3946	1.46373	28.0155	1.51858
	222.788	69.4057	5.86386	73.1367	6.60484	41.8759	3.48324	38.7761	3.88921			222.788	38.9874	3.47653	42.5363	3.51521	26.0713	1.24372	25.3445	2.40515			222.788	29.389	2.89065	31.9943	2.86747	28.3682	1.43716	28.0206	1.5154
	224.172	70.6041	5.59446	73.6182	6.80057	41.9309	3.51395	38.8267	3.90026			224.172	38.9716	3.53002	42.6864	3.53095	26.1955	1.27951	25.3191	2.35635			224.172	29.3645	3.0099	31.4684	2.86917	28.1806	1.57329	28.1874	1.44604
	225.556	70.4312	5.8304	74.9631	6.78092	42.0683	3.59159	38.5399	3.81667			225.556	38.8282	3.58635	43.0661	3.8937	26.1279	1.30075	25.3878	2.39043			225.556	29.6168	3.16491	31.335	2.91773	28.0879	1.51582	28.4786	1.47664
	226.94	70.7632	5.80106	74.802	6.71658	42.449	3.57703	38.6023	3.67142			226.94	38.7421	3.55039	42.8958	3.99666	26.0751	1.3318	25.4912	2.34864			226.94	29.4605	3.3093	31.6346	3.02274	27.9558	1.49465	28.8295	1.29288
	228.324	71.1615	5.72509	75.2396	6.58357	42.7421	3.51975	39.0376	3.63137			228.324	38.9602	3.61479	42.8207	3.96137	26.0245	1.26886	25.4365	2.26692			228.324	29.6877	3.31688	31.5994	3.07761	28.0062	1.56515	29.1579	1.1309
	229.707	70.7678	5.24134	75.7	6.60881	42.6196	3.46787	39.2923	3.72317			229.707	39.1428	3.64324	42.759	3.80669	26.098	1.26461	25.669	2.27924			229.707	29.6927	3.2444	31.7141	2.97778	28.4224	1.46528	29.0163	1.08202
	231.091	71.476	5.17238	75.6784	6.6571	42.7214	3.40171	39.2889	3.71691			231.091	38.9065	3.69907	42.6962	3.74725	26.1702	1.28529	25.8285	2.33414			231.091	29.1293	3.04514	31.9234	2.8743	28.562	1.46356	28.9546	1.028
	232.475	72.1737	5.05543	75.9831	6.56449	43.1213	3.35261	39.8754	3.73465			232.475	38.9037	3.73549	42.5057	3.72034	26.235	1.27603	25.8125	2.28284			232.475	28.4813	2.83887	32.2415	2.92953	28.5115	1.58062	29.2627	1.03216
	233.859	72.1944	5.07049	76.5917	6.64631	43.0802	3.41232	40.2283	3.72814			233.859	38.9819	3.72111	42.776	3.71815	26.2435	1.24649	25.7883	2.25423			233.859	28.6581	2.80694	32.3425	3.0531	28.6218	1.58697	29.645	1.19407
	235.242	72.7747	5.09446	77.075	6.37863	42.9174	3.47607	39.8482	3.82732			235.242	39.1152	3.61958	43.02	3.58665	26.0747	1.24706	25.8607	2.29817			235.242	29.0303	2.81984	32.0688	2.97842	28.7838	1.52258	29.8272	1.30314
	236.626	73.3003	4.98048	78.175	6.49408	42.9108	3.4416	40.1171	3.70921			236.626	39.2161	3.68808	42.7083	3.57825	26.129	1.24025	25.9203	2.31508			236.626	29.1549	2.71103	31.6424	2.89055	28.8529	1.44729	29.8777	1.30575
	238.01	74.0364	4.84419	78.2125	6.52029	42.694	3.25134	40.4898	3.63046			238.01	39.2501	3.78745	42.7635	3.68594	26.1824	1.17678	25.9745	2.29378			238.01	29.0529	2.56934	31.6086	2.99819	28.7565	1.44363	29.7681	1.22523
	239.394	74.4344	5.16372	78.8899	6.57353	42.7992	3.2	40.5993	3.54141			239.394	39.2296	3.81299	43.1054	3.70911	26.149	1.1219	25.9216	2.2678			239.394	28.8777	2.61622	31.5413	3.05227	28.8258	1.54861	29.4982	1.20739
	240.778	74.1883	5.0891	79.0384	6.7254	43.4613	3.29899	40.2225	3.59501			240.778	39.2059	3.88987	43.0749	3.69813	26.1692	1.17766	25.8251	2.22484			240.778	28.4098	2.74617	31.6387	2.97078	28.8369	1.5459	29.7815	1.39243
	242.161	73.126	4.97408	79.2469	6.43316	43.5531	3.26467	40.8833	3.55386			242.161	39.1987	3.97748	43.1046	3.74426	26.113	1.20673	25.7876	2.23517			242.161	28.5257	2.78556	31.4566	3.05268	28.7166	1.51515	29.7914	1.30041
	243.545	73.5485	5.11141	80.8877	6.45713	43.4778	3.26398	41.2246	3.5299			243.545	39.1361	4.06378	43.2065	3.79923	26.1265	1.17721	25.6282	2.23619			243.545	28.392	2.8677	31.5919	3.17222	28.5993	1.43163	29.6671	1.27807
	244.929	73.9306	5.1792	82.04	6.43244	43.537	3.25889	41.0695	3.48575			244.929	39.0076	4.03576	43.6583	3.80971	26.3064	1.15915	25.6053	2.22188			244.929	28.0004	2.97223	31.6456	3.26494	28.6124	1.43657	29.868	1.42442
	246.313	74.2033	5.01556	82.1746	6.56918	44.1039	3.20229	40.8003	3.51618			246.313	38.9364	3.95986	44.4084	4.06238	26.3602	1.18428	25.5578	2.21232			246.313	28.3527	3.04082	31.8091	3.4117	28.5786	1.48648	29.7548	1.43594
	247.696	75.0767	5.05312	82.871	6.66095	44.2384	3.35523	40.9836	3.45092			247.696	39.3374	4.05418	44.6531	4.15834	26.338	1.19197	25.5572	2.22838			247.696	28.5015	2.96835	32.2044	3.56257	28.1892	1.49059	29.7394	1.40496
	249.08	75.1655	4.91251	83.2835	6.52477	43.8466	3.4095	41.1443	3.45495			249.08	39.3666	4.1245	44.7202	4.157	26.1276	1.12028	25.5838	2.1976			249.08	28.3382	2.70767	32.2027	3.41472	28.131	1.37383	29.8551	1.38627
	250.464	75.7609	4.88865	83.3426	6.90255	43.9422	3.27369	41.2963	3.49768			250.464	39.4227	4.10877	44.8943	4.17271	26.0245	1.07605	25.5242	2.13997			250.464	28.4775	2.48032	32.5763	3.28028	28.4056	1.28662	29.868	1.37334
	251.848	76.5428	4.91815	84.4915	6.90706	43.8075	3.16724	41.3912	3.40934			251.848	39.6584	4.02938	45.0106	4.2874	26.0301	1.05378	25.6465	2.1119			251.848	28.7792	2.61663	32.9403	3.13395	28.6947	1.30267	29.8775	1.31586
	253.232	76.7299	4.83102	84.6271	6.84671	43.3721	3.11799	41.4691	3.44032			253.232	39.3759	3.88198	45.0403	4.44168	25.9303	1.08865	25.6948	2.15811			253.232	28.7967	2.47299	32.6622	3.01709	29.0159	1.44135	30.0453	1.2093
	254.615	77.4755	4.73626	85.6251	6.89388	43.1539	3.1923	41.917	3.33828			254.615	39.4449	4.04529	45.1354	4.48673	25.8704	1.11203	25.7157	2.21016			254.615	28.5882	2.31619	32.259	3.151	28.8823	1.56908	30.0483	1.18404
	255.999	78.1783	4.717	86.4129	6.74164	43.3376	3.09881	41.793	3.29744			255.999	39.7205	4.15604	44.9512	4.51156	25.9196	1.15182	25.7423	2.14919			255.999	28.4797	2.45895	32.1903	3.14219	28.5416	1.62357	30.1464	1.01611
	257.383	78.1257	4.70889	86.3668	6.94656	43.5241	3.0854	41.687	3.39067			257.383	39.8228	4.20959	44.7945	4.64884	25.831	1.15473	25.6139	2.1166			257.383	28.3178	2.54165	32.106	3.11833	28.4446	1.71603	29.6984	0.810707
	258.767	77.9264	4.54921	87.5339	7.0651	43.9531	3.18632	41.8213	3.30963			258.767	39.8977	4.32036	44.8974	4.56969	25.8423	1.1577	25.4777	2.11996			258.767	28.1592	2.47103	31.7604	3.04423	28.7629	1.70827	29.4863	0.808862
	260.151	78.5344	4.67875	88.5639	6.80634	44.3754	3.19012	41.7689	3.14372			260.151	39.8596	4.32243	45.0735	4.53368	25.843	1.11955	25.4735	2.12154			260.151	28.1373	2.5697	31.8936	3.00927	28.8824	1.64577	29.757	0.853095
	261.534	78.6424	4.85267	88.3638	6.69626	44.4921	3.15332	41.8513	3.15472			261.534	39.8585	4.23678	45.2854	4.58859	25.9922	1.15893	25.6067	2.13528			261.534	28.4233	2.64255	32.0141	3.05154	28.6382	1.58515	29.7421	0.765273
	262.918	79.1672	4.84752	88.3824	7.02605	44.325	3.10647	41.8788	3.2797			262.918	39.8859	4.21257	45.4325	4.70862	25.9422	1.12504	25.4777	2.11427			262.918	28.6773	2.64033	31.913	3.01604	28.8377	1.67894	29.5496	0.748237
	264.302	80.244	4.70456	89.2153	7.29753	44.3319	3.10082	41.689	3.38925			264.302	39.9046	4.19302	45.4922	4.8495	25.9031	1.13168	25.2987	2.09409			264.302	28.8214	2.55416	31.4437	2.91101	29.0081	1.62461	29.1786	0.946265
	265.686	79.5628	4.65857	89.9847	7.45156	44.3858	3.19088	41.6892	3.39151			265.686	39.9699	4.20001	45.7012	5.0247	25.965	1.14165	25.1492	2.07457			265.686	28.8097	2.51381	31.3786	2.89614	29.0613	1.40999	29.0042	1.04849
	267.069	80.0216	4.66606	90.4175	7.52292	44.5852	3.04813	42.2731	3.36202			267.069	40.0512	4.19615	45.8029	4.99846	25.8205	1.09765	25.2749	2.02301			267.069	28.8976	2.53228	31.4039	2.82384	29.1093	1.26885	29.0517	1.01321
	268.453	81.0043	4.61366	90.8536	7.47841	44.4997	2.92106	42.7294	3.34709			268.453	40.1833	4.23497	45.6095	4.97807	25.8507	1.08832	25.3202	2.04344			268.453	29.1759	2.50136	31.2485	2.79821	28.9588	1.11338	29.2249	1.02689
	269.837	80.8332	4.44655	90.4612	7.41194	44.6987	3.08431	42.5433	3.48844			269.837	40.3789	4.47104	45.3095	4.97014	25.9591	1.05929	25.3523	2.09361			269.837	29.1708	2.47105	31.1836	3.04007	29.2312	1.06576	28.9666	0.96332
	271.221	80.5329	4.8397	90.2412	7.40886	45.0567	3.12462	42.1497	3.3538			271.221	40.1024	4.28528	45.3266	5.03937	26.0949	1.07453	25.2934	2.06769			271.221	28.876	2.37396	31.0207	3.19576	29.6649	1.05702	28.6682	0.894109
	272.605	80.1304	4.9967	90.5386	7.38344	45.7152	3.15281	42.1638	3.3518			272.605	39.7795	4.1046	45.3301	5.15265	26.1014	1.13077	25.0489	2.03801			272.605	29.0538	2.46687	30.8413	3.08847	29.7471	0.996271	29.0235	1.07566
	273.988	80.6768	4.95695	91.2283	7.56226	45.8501	3.18021	42.5731	3.3329			273.988	39.8395	4.09754	45.3755	5.09185	26.1473	1.10383	25.0877	2.04884			273.988	29.4314	2.74431	30.6496	2.86693	29.5632	1.05323	29.1716	1.13202
	275.372	81.275	4.996	91.2994	7.77588	45.7241	3.22016	42.538	3.38597			275.372	40.0547	4.12635	45.4906	4.96522	26.2253	1.07794	25.0744	1.98308			275.372	29.5994	2.67763	30.6955	2.86595	29.8091	1.26208	29.1287	1.05671
	276.756	81.3125	4.52849	92.2775	7.70759	46.4164	3.10829	42.8148	3.48907			276.756	40.1148	4.10924	45.6798	4.94606	26.3388	1.06065	25.1794	1.95168			276.756	29.3749	2.57714	31.0507	2.94025	30.3383	1.43059	29.3934	1.1408
	278.14	81.1221	4.269	93.0679	7.76644	46.4249	3.06011	43.0295	3.43814			278.14	40.3042	4.21122	45.578	4.85367	26.5075	1.051	25.2826	2.06772			278.14	29.5028	2.72058	31.2316	2.92255	30.3022	1.37163	29.168	1.17362
	279.523	81.1342	4.00191	92.9386	7.91634	46.3651	3.06561	42.6361	3.49195			279.523	40.2891	4.31306	45.291	4.69087	26.4101	1.05554	25.2353	2.06265			279.523	29.9588	2.75149	31.3057	2.85082	30.138	1.51074	29.0629	1.14367
	280.907	81.571	3.81933	92.1592	7.6108	46.5176	2.91295	42.4203	3.48099			280.907	40.2084	4.28308	45.2174	4.86415	26.3133	1.10457	25.0851	1.99399			280.907	30.2496	2.83055	31.3303	2.97878	30.5594	1.72346	28.9738	1.08137
	282.291	82.4296	3.90758	91.6448	7.10568	46.6993	2.73887	42.7009	3.36004			282.291	40.3483	4.36431	45.0761	4.93554	26.4299	1.0983	25.1044	2.00057			282.291	30.4932	2.85639	31.0819	3.07384	30.8915	1.80645	28.7246	1.0529
	283.675	82.803	3.95721	92.4505	6.86743	46.8668	2.8657	43.0024	3.38868			283.675	40.2566	4.42731	45.0497	4.76405	26.4283	1.11321	25.131	1.98297			283.675	30.3276	2.85935	31.2014	3.18852	31.0558	1.78448	28.5625	1.17965
	285.059	82.9349	4.08733	92.6847	7.03325	46.8546	2.82516	43.2596	3.55076			285.059	40.3476	4.46096	45.1868	4.55318	26.4011	1.14613	25.274	1.99035			285.059	30.1924	2.97185	31.465	3.2919	30.7596	1.83574	28.5565	1.22067
	286.442	82.9151	3.94874	93.4292	7.17092	46.9771	2.74952	43.0257	3.31361			286.442	40.4486	4.39883	45.203	4.31474	26.3576	1.14845	25.2314	2.01314			286.442	29.9569	3.14891	31.6905	3.28457	30.6761	1.78022	28.7018	1.3453
	287.826	83.3103	3.70833	93.934	7.22836	47.0223	2.7113	43.1631	3.23951			287.826	40.4077	4.43843	45.3511	4.27159	26.4383	1.14294	25.1703	1.98633			287.826	29.3699	3.15493	31.6142	3.161	30.749	1.65246	29.3482	1.45586
	289.21	82.77	3.45649	94.5748	7.23785	47.3102	2.815	43.5855	3.26768			289.21	40.2421	4.41844	45.5023	4.23045	26.5087	1.19561	25.3381	1.94862			289.21	28.8031	2.98442	31.4793	3.10538	30.5691	1.75968	29.5994	1.49523
	290.594	82.6151	3.6417	95.8633	7.28427	47.1595	2.90161	43.4458	3.16284			290.594	40.4605	4.26007	45.4428	4.26958	26.3514	1.17817	25.413	1.96577			290.594	28.8749	2.95135	31.9106	3.14527	30.3937	1.93094	29.7451	1.35862
	291.977	83.8038	3.6728	95.8502	7.29944	47.4575	2.84579	43.4156	3.18291			291.977	40.4694	4.27854	45.5385	4.34418	26.4012	1.13152	25.5387	2.01086			291.977	29.2024	3.05866	32.3122	3.15791	30.1858	1.93862	29.5153	1.32546
	293.361	83.7378	3.71423	95.7775	7.29286	47.5426	2.88302	43.4508	3.18763			293.361	40.2562	4.23595	45.4303	4.28556	26.583	1.17026	25.4667	1.98399			293.361	29.5554	3.11877	31.8929	3.0809	29.9771	1.98033	29.2007	1.31439
	294.745	83.7654	3.78565	95.1817	6.87899	47.5885	3.01664	43.4564	3.18927			294.745	40.1023	4.168	45.3464	4.24796	26.6523	1.2243	25.2481	1.98539			294.745	29.8069	3.14814	31.917	3.05762	29.7596	2.0587	29.4555	1.24104
	296.129	84.4492	4.05289	95.7904	6.71618	47.7465	3.08302	43.2359	3.16589			296.129	40.0829	4.28528	45.4499	4.32335	26.6645	1.23341	25.2287	2.01486			296.129	29.8479	3.16748	32.2976	3.17662	29.8911	2.26156	29.7198	1.19332
	297.513	83.5301	4.11138	96.2747	6.75992	47.736	2.99584	43.386	3.10818			297.513	39.8824	4.18368	45.4176	4.37595	26.6448	1.19301	25.2535	2.0148			297.513	29.9302	3.23083	32.1308	3.14631	30.3325	2.49555	29.6896	1.07115
	298.896	83.1536	4.07562	96.3129	6.84397	47.9112	2.97371	43.5052	2.99737			298.896	39.8383	3.94694	45.4156	4.45344	26.4631	1.17114	25.2868	2.01631			298.896	29.8275	3.18917	32.0069	3.20971	30.3733	2.36342	30.0366	0.910266
	300.28	83.881	4.17054	96.8801	7.301	47.8998	3.01887	43.363	2.83991			300.28	39.8004	3.9001	45.4527	4.54107	26.3695	1.22156	25.1223	1.97034			300.28	29.5866	3.14841	31.611	3.26189	30.3014	2.35231	30.2094	0.795185
	301.664	83.9719	4.25553	97.5166	7.92635	47.4915	3.14321	43.3719	2.79092			301.664	39.6668	4.01349	45.6262	4.54608	26.301	1.18279	25.1221	1.95659			301.664	29.2382	3.04963	31.7684	3.34038	30.2813	2.44693	30.2745	0.687353
	303.048	84.1209	4.64602	97.3167	7.84301	47.266	3.1369	43.2629	2.90955			303.048	39.9688	4.03694	45.7022	4.62223	26.2519	1.19233	25.0729	1.9429			303.048	28.7269	2.93339	31.9957	3.30371	30.6205	2.45187	30.0253	0.758965
	304.431	85.1089	4.84196	96.8977	7.86558	47.4822	3.11048	43.199	2.94401			304.431	39.9471	4.03478	45.4244	4.63424	26.3502	1.27483	24.9258	1.95296			304.431	28.3126	2.89204	31.669	3.24124	30.7177	2.48452	29.7602	0.896984
	305.815	86.0298	4.43087	96.9037	7.65323	47.602	3.14235	43.1086	2.87348			305.815	39.8789	4.06187	45.2354	4.61659	26.4011	1.26888	24.9402	2.03832			305.815	28.1033	2.85792	31.6599	3.22906	30.5739	2.43939	29.6534	0.906008
	307.199	85.5467	4.23486	97.6099	7.6583	47.3821	3.15487	42.9579	2.91656			307.199	39.787	4.06172	45.0583	4.45682	26.2878	1.22275	25.0008	2.07667			307.199	28.279	2.88717	31.7335	3.20406	30.0429	2.44566	29.4597	1.17586
	308.583	85.8056	4.53026	98.3195	7.61459	47.6859	3.24661	43.1557	3.01868			308.583	39.9862	4.15081	45.2402	4.37368	26.4747	1.30789	25.0437	1.99671			308.583	28.5031	2.90375	31.8076	3.09452	29.4963	2.40812	29.181	1.22745
	309.967	85.8536	4.49168	98.806	7.96905	47.3776	3.27557	43.4658	2.84414			309.967	40.1928	4.18505	45.4005	4.32514	26.4534	1.33716	25.2007	2.06054			309.967	28.7056	2.84936	31.8554	2.91035	29.2907	2.13811	28.8721	1.143
	311.35	86.5009	4.38304	99.2706	8.19497	47.2563	3.38604	43.0825	2.77208			311.35	40.2166	4.0622	45.2463	4.30664	26.3326	1.2926	25.1765	2.01457			311.35	29.3352	2.81317	32.219	2.90794	29.1273	1.87726	29.3549	1.24487
	312.734	86.8169	4.46584	98.6778	7.99456	47.4312	3.27535	42.9956	2.88732			312.734	40.315	4.00986	45.475	4.36889	26.3354	1.29726	24.9412	1.90445			312.734	29.6245	2.7386	32.3104	2.82938	28.6057	1.82103	29.5152	1.23307
	314.118	87.4656	4.49632	99.3151	7.81616	47.5075	3.13466	43.3246	2.87325			314.118	40.6471	4.09116	45.551	4.3112	26.3572	1.31792	25.113	1.9629			314.118	30.0501	2.66236	31.9879	2.7972	28.6711	1.90814	29.6505	1.34066
	315.502	87.857	4.64379	98.9712	7.66305	47.3724	3.12928	43.0608	2.80754			315.502	40.8214	4.18821	45.5716	4.26843	26.2819	1.3147	25.2503	2.0252			315.502	29.9422	2.67958	32.1057	3.02805	29.2427	1.94276	29.7269	1.47282
	316.885	87.3254	4.71611	98.7443	7.53585	47.2071	3.08815	43.3256	2.73798			316.885	40.6908	4.10423	45.8514	4.34587	26.4757	1.29831	25.1582	2.0473			316.885	29.7243	2.67806	32.4181	3.28651	29.5944	1.95699	29.8945	1.34373
	318.269	87.2601	4.48608	98.8307	7.7285	47.0991	3.08959	43.3385	2.75548			318.269	40.4669	4.01683	45.4606	4.43248	26.333	1.3505	25.0716	2.01869			318.269	29.3451	2.7188	32.1498	3.43535	29.8383	2.10292	30.0349	1.20599
	319.653	87.5835	4.33361	98.9036	8.19863	47.0198	3.21864	43.1961	2.60022			319.653	40.3899	4.05498	45.1703	4.42413	26.3178	1.4151	25.0827	2.04068			319.653	29.1696	2.75874	31.792	3.36471	30.2152	2.31247	30.0128	1.28444
	321.037	87.6133	4.34834	99.1383	8.33095	47.386	3.16098	42.8727	2.63305			321.037	40.6233	4.1661	45.2119	4.31626	26.4215	1.41928	25.0977	2.03654			321.037	28.8457	2.79056	31.77	3.2565	30.5509	2.45414	30.079	1.34553
	322.421	87.8774	4.54729	100.155	8.51734	47.2631	3.10008	42.861	2.73058			322.421	40.8311	4.24231	45.3814	4.26836	26.2654	1.42073	25.1127	2.05264			322.421	28.6805	2.74548	31.9853	3.23112	30.5854	2.56953	30.0663	1.33879
	323.804	89.1934	4.61011	100.444	8.58808	46.9844	3.1592	42.7772	2.64271			323.804	40.7519	4.18337	45.3164	4.28504	26.2296	1.4423	25.051	2.07053			323.804	28.765	2.68778	32.1329	3.20931	30.4768	2.7479	29.8939	1.37929
	325.188	88.7859	4.66692	100.038	8.59055	46.601	3.0956	42.0933	2.79857			325.188	40.5761	4.10788	44.9422	4.25759	26.2003	1.42321	25.1316	2.05139			325.188	28.4718	2.64413	31.9098	3.01582	30.3607	2.70228	29.9204	1.27649
	326.572	88.7819	4.44835	99.7272	8.53482	46.7447	3.07443	42.1823	2.8411			326.572	40.7881	4.21827	45.1368	4.32722	26.274	1.3976	25.1567	2.00986			326.572	28.1598	2.53079	31.5326	2.98365	30.3136	2.54461	29.7997	1.11768
	327.956	89.7105	4.6041	98.6883	8.67752	46.9755	3.10758	42.7574	2.65559			327.956	40.8106	4.26646	45.2487	4.3042	26.2776	1.3938	24.9778	2.01231			327.956	28.6285	2.54871	31.6161	3.063	30.3352	2.39633	29.7002	1.05433
	329.339	90.2748	4.64039	98.9915	8.61126	46.8774	3.14681	42.1364	2.66551			329.339	40.9827	4.30957	44.9947	4.15729	26.1385	1.37097	24.8141	1.93836			329.339	29.2746	2.53777	31.8883	3.29084	30.4799	2.3025	29.8829	1.1705
	330.723	91.005	4.62638	98.622	8.63317	46.3918	3.01572	41.5598	2.60429			330.723	41.2418	4.34678	44.781	4.05829	26.231	1.36589	24.8441	1.95503			330.723	29.7622	2.54766	32.0003	3.29039	30.2047	2.32811	30.1322	1.33402
	332.107	91.9347	4.95366	98.4181	8.42944	46.392	2.90916	41.7477	2.79917			332.107	41.414	4.28444	44.8494	4.06461	26.0822	1.27743	25.0305	1.99662			332.107	29.7659	2.53763	32.0297	3.24771	30.0373	2.24448	30.0164	1.35499
	333.491	91.3028	5.16853	99.7944	8.56803	46.1432	2.84042	41.9168	2.95031			333.491	41.4071	4.31487	45.0322	4.26967	25.8857	1.25308	25.0129	1.91809			333.491	29.7405	2.62093	32.0958	3.20578	29.9835	2.26102	30.1549	1.35253
	334.875	89.9008	4.97254	99.4788	8.9653	45.909	2.89285	41.9317	2.83549			334.875	41.2629	4.32891	45.3567	4.32042	25.8635	1.29674	24.9846	1.86709			334.875	29.1686	2.733	31.9372	3.22522	29.8736	2.24485	30.2027	1.46372
	336.258	90.4753	5.07005	98.7378	8.82525	46.0419	2.90854	41.5955	2.717			336.258	41.0323	4.28502	45.4023	4.33359	25.9459	1.3098	24.9571	1.84141			336.258	28.6199	2.82945	31.1637	3.11042	29.9089	1.96631	30.2698	1.701
	337.642	90.6681	4.9485	98.2356	8.8676	46.4114	2.82296	41.4338	2.79778			337.642	40.9566	4.31479	45.4813	4.48289	25.9733	1.37703	24.9415	1.81701			337.642	28.4143	2.88049	30.867	2.9863	29.8893	1.88733	30.6722	1.79799
	339.026	90.5814	4.44809	98.1421	8.86403	46.4569	2.90538	41.4267	2.98283			339.026	40.9311	4.24648	45.5075	4.57255	25.9636	1.32858	24.9196	1.86175			339.026	28.2723	2.88702	30.7957	2.96291	29.7431	1.82722	30.9619	1.73775
	340.41	90.0438	4.43132	98.2894	9.04165	46.003	2.92612	41.2601	3.01475			340.41	40.384	4.12027	45.566	4.67876	25.8736	1.25666	24.9547	1.89844			340.41	28.6211	2.97329	30.9571	2.88541	29.7759	1.74947	31.217	1.72308
	341.793	90.5644	4.41738	98.7976	9.20903	45.4672	2.8572	41.267	2.88478			341.793	40.1937	3.96394	45.5776	4.85839	25.795	1.26543	24.8415	1.87855			341.793	28.6246	2.94102	30.9396	2.96952	29.5413	1.75747	31.2755	1.76677
	343.177	90.1656	4.33298	98.546	8.75273	45.4956	2.89891	41.3077	2.75059			343.177	40.1902	4.01997	45.7309	4.86497	25.8422	1.28153	24.7288	1.83838			343.177	28.3298	2.6851	30.9262	3.19886	29.2729	1.86041	31.0039	1.7993
	344.561	89.8561	4.23556	98.557	8.57285	45.8145	2.88908	41.1227	2.66675			344.561	40.1487	4.03929	45.99	4.80913	25.8884	1.30103	24.942	1.92424			344.561	27.8795	2.67202	30.9737	3.2681	29.1302	2.0688	30.8576	1.67884
	345.945	88.904	4.04158	98.3552	8.69354	46.0104	2.95787	40.9608	2.84742			345.945	40.1784	4.105	45.8751	5.04429	25.8345	1.26698	24.9596	1.9529			345.945	28.2453	2.77719	30.7174	3.20401	28.9059	2.05283	30.6467	1.66124
	347.329	88.4483	3.89282	97.4669	8.61014	45.8392	2.92321	41.4029	2.93375			347.329	40.6154	4.14681	45.9161	5.36686	25.8843	1.20833	24.9786	1.92451			347.329	28.2472	2.76142	30.7491	3.12363	28.8757	1.8938	30.6723	1.62975
	348.712	88.3166	3.84809	97.4292	8.79903	45.4924	2.86999	41.4752	2.81566			348.712	40.5204	4.08956	46.0026	5.40464	25.8641	1.27534	25.163	1.9334			348.712	28.2102	2.76442	31.208	3.10089	29.2025	1.88296	30.6764	1.51835
	350.096	88.4897	3.81	97.2869	8.14022	45.6339	2.95846	41.2875	2.79111			350.096	40.4033	4.04804	46.0585	5.21095	25.9768	1.28157	24.9024	1.87154			350.096	28.327	2.81706	31.5567	3.15018	29.2801	1.90414	30.4428	1.46243
	351.48	88.0638	3.55834	96.6254	7.67288	45.6947	2.85372	41.341	2.89053			351.48	40.4505	3.9523	45.9884	5.22009	26.0792	1.21668	24.8586	1.81652			351.48	28.3793	2.88695	31.6395	3.18964	29.2143	1.92999	30.2195	1.47753
	352.864	87.9564	3.45655	95.4812	7.67842	45.5905	2.79059	41.4086	2.82161			352.864	40.8338	4.01333	45.7121	5.24874	26.0645	1.19842	25.1032	1.92703			352.864	28.2296	2.72748	31.6518	3.2269	29.3426	1.96633	30.1775	1.49738
	354.248	87.4042	3.80771	93.78	7.6725	45.7297	2.8877	41.1252	2.73331			354.248	40.6013	3.96653	45.2841	5.20559	26.0598	1.23395	25.1284	1.94129			354.248	28.6424	2.69252	31.7388	3.31607	29.5873	1.97925	30.2995	1.53633
	355.631	87.17	3.86702	93.046	7.4937	45.6066	3.0234	40.9762	2.84279			355.631	40.3857	3.8571	44.9417	5.18624	26.0951	1.25545	25.1796	1.96758			355.631	28.8826	2.75558	31.8001	3.18556	29.5351	1.95131	30.6048	1.66186
	357.015	86.7097	4.00932	92.5196	7.3582	45.2177	2.96892	41.1873	2.93209			357.015	40.2625	3.81363	44.8248	5.04075	26.1831	1.27725	25.323	1.99588			357.015	28.8282	2.61899	31.7886	3.08521	29.5406	1.96309	30.9258	1.75639
	358.399	85.9406	3.78941	92.228	7.27814	45.8618	2.94787	40.9245	2.90325			358.399	40.3261	3.79639	44.6405	4.75753	26.2137	1.27043	25.3108	1.97021			358.399	28.7481	2.56952	31.9446	2.99245	29.6551	1.99933	31.4085	1.71985
	359.783	85.9656	3.83947	92.5941	7.46879	45.8889	2.88278	40.8783	2.92156			359.783	40.2307	3.89382	44.5794	4.69362	26.2127	1.25476	25.1917	1.98849			359.783	28.5094	2.53217	31.817	2.92003	29.9403	1.97318	31.5422	1.75948
	361.166	86.1446	3.85112	92.187	7.16495	45.1814	2.92085	40.7045	3.00975			361.166	40.3116	3.88969	44.7184	4.67163	26.1769	1.22601	25.0063	1.95447			361.166	28.0343	2.49608	31.5098	2.86135	29.9346	1.96693	31.5766	1.76165
	362.55	85.8624	3.99196	92.3255	7.15158	45.2973	3.0298	40.6312	2.98899			362.55	40.2665	3.85805	44.8295	4.60582	26.2406	1.26683	25.0818	1.93902			362.55	28.3219	2.59884	31.3169	2.91247	30.1473	2.03638	31.5834	1.78997
	363.934	85.7353	4.15336	91.9925	7.23779	45.4096	3.07705	40.655	2.97299			363.934	40.3477	3.80797	44.6746	4.52145	26.4612	1.33916	25.3538	1.99032			363.934	28.5749	2.69903	31.6767	2.86027	30.7931	2.17609	31.5072	1.78867
	365.318	86.4461	4.18717	91.8238	7.18597	45.1745	3.03316	40.3441	2.97715			365.318	40.3513	3.78094	44.796	4.50288	26.5204	1.3741	25.4284	2.07073			365.318	28.8705	2.65328	32.1155	2.91598	31.1452	2.28264	31.353	1.6918
	366.702	86.8341	4.38152	91.9171	7.0634	45.264	3.13469	40.0661	3.02479			366.702	40.0481	3.65725	44.5769	4.41736	26.5735	1.44806	25.312	2.06937			366.702	28.8921	2.56142	31.9372	2.88109	30.9205	2.24972	31.415	1.69122
	368.085	86.9056	4.33662	91.1076	6.76387	45.205	3.10298	39.9441	3.10665			368.085	40.1165	3.81016	44.3911	4.33888	26.5672	1.46503	25.1645	2.02016			368.085	28.9193	2.59831	32.061	2.81596	30.9124	2.20172	31.2846	1.58618
	369.469	85.1606	3.9394	90.3253	6.86905	45.2302	3.10765	39.8252	3.05605			369.469	40.0664	3.9138	44.78	4.38773	26.568	1.45267	25.3169	2.03021			369.469	29.0201	2.65785	32.3552	2.84383	30.7516	2.13198	31.3701	1.47273
	370.853	84.2485	3.8914	89.9784	7.1122	45.2027	3.15112	39.8311	3.09112			370.853	39.5974	3.84609	44.9343	4.43966	26.5467	1.41342	25.241	2.05292			370.853	28.394	2.4151	32.367	3.06415	30.4414	2.04413	31.8572	1.49789
	372.237	84.2168	4.21593	89.7136	7.0134	45.2094	3.05979	39.8696	3.13349			372.237	39.6645	3.78833	44.7622	4.31578	26.566	1.42005	25.3322	2.13366			372.237	28.2895	2.2998	31.8279	3.28641	30.124	2.12416	31.8261	1.48865
	373.62	84.5395	4.10947	89.1868	6.68319	45.0081	3.05686	40.3013	3.27082			373.62	39.7263	3.7881	44.7823	4.19749	26.7068	1.42607	25.6161	2.21598			373.62	27.981	2.36164	31.6013	3.44613	30.3026	2.17221	32.0115	1.70475
	375.004	84.5093	4.38516	88.5063	6.81407	44.5003	3.04046	40.4491	3.1833			375.004	39.8711	3.96072	44.6687	4.09456	26.6074	1.38446	25.8507	2.28166			375.004	27.9367	2.27716	31.5006	3.40606	30.8276	2.28072	32.5403	1.91331
	376.388	84.377	4.60206	88.5995	6.77098	44.1602	3.03844	39.9285	3.01018			376.388	39.9984	3.9687	44.6868	4.07533	26.5425	1.34871	25.8795	2.28641			376.388	27.918	2.33786	31.5651	3.38082	31.0866	2.30393	33.2017	1.92771
	377.772	82.92	4.31789	88.2034	6.95526	44.2925	2.97969	40.0386	3.17765			377.772	39.6204	3.80192	44.5942	3.90489	26.5914	1.39133	25.8333	2.28527			377.772	27.6141	2.39526	31.7321	3.37886	31.0456	2.31971	33.4216	1.86173
	379.156	81.3527	4.22018	87.8843	6.84014	44.6821	2.85177	39.7897	3.15337			379.156	39.473	3.7436	44.4784	3.82454	26.7953	1.44695	26.0028	2.36848			379.156	27.4346	2.44422	31.792	3.12565	31.3023	2.38146	33.3124	1.91459
	380.539	81.8238	4.07466	87.6966	6.80675	44.6902	2.76987	39.6222	3.14176			380.539	39.6921	3.75899	44.7876	3.84175	26.9243	1.41482	26.1762	2.42359			380.539	27.3539	2.41104	31.7434	2.93661	31.7231	2.3199	33.576	1.80564
	381.923	82.0601	4.30935	87.898	6.80094	44.6774	2.8913	39.9305	3.37327			381.923	39.7224	3.72922	44.598	3.66193	26.8858	1.3923	26.2108	2.37112			381.923	27.7473	2.35233	31.6243	2.96986	32.0651	2.22456	33.5082	1.58748
	383.307	81.7722	4.48429	87.3	6.71303	44.6114	2.8275	40.3406	3.37217			383.307	39.7737	3.77557	44.463	3.59385	26.7925	1.42252	26.3816	2.44684			383.307	28.0566	2.42077	31.8039	3.05597	32.1722	2.19473	33.5161	1.48755
	384.691	81.1082	4.28416	87.5451	6.72691	44.357	2.80134	40.3365	3.24116			384.691	39.904	3.88521	44.8989	3.80663	26.7509	1.42661	26.2705	2.48648			384.691	28.2379	2.39949	31.736	3.04607	31.8782	2.31552	33.6923	1.48546
	386.074	81.2782	4.28697	87.7698	6.4829	44.0755	2.75661	40.6338	3.15722			386.074	39.9746	3.85294	45.1092	3.87322	26.8107	1.42526	26.3177	2.4736			386.074	28.4268	2.29383	31.6345	3.03503	31.903	2.57942	33.3843	1.48167
	387.458	81.4086	4.59429	87.5591	6.60523	44.1515	2.70331	40.4701	3.2978			387.458	39.963	3.77988	45.1743	3.93201	26.8702	1.35895	26.5071	2.44068			387.458	28.4827	2.24265	31.8583	3.07556	32.4155	2.79072	33.5308	1.55885
	388.842	80.6894	4.84614	87.7454	6.79243	44.2513	2.8986	40.216	3.35752			388.842	40.2675	3.81428	45.3952	3.96525	26.9493	1.3431	26.6858	2.47969			388.842	28.277	2.22226	31.877	3.22859	32.8824	3.03255	33.8607	1.68962
	390.226	80.539	5.09694	87.8648	6.7694	44.4212	2.8791	40.3609	3.29688			390.226	40.3081	3.87684	45.6727	4.01908	27.2213	1.43123	26.7559	2.50256			390.226	28.4853	2.26683	31.8473	3.37298	32.9455	2.80774	33.8928	1.66126
	391.61	80.7033	4.98733	87.781	6.77388	44.1304	2.55849	40.2041	3.36218			391.61	40.7393	4.00219	45.9164	4.03199	27.0754	1.51686	26.8399	2.51606			391.61	28.387	2.3777	31.5561	3.30294	32.7588	2.6543	33.9222	1.52887
	392.993	81.386	5.08217	87.4547	6.85552	44.1038	2.66353	40.2098	3.4992			392.993	40.9699	4.01628	45.9127	3.97386	26.9071	1.54602	26.9785	2.55553			392.993	28.4305	2.50214	31.8874	3.24694	32.787	2.66634	33.8724	1.76679
	394.377	81.1846	5.12331	87.2382	6.6801	44.142	2.88047	40.6054	3.59514			394.377	41.0262	4.07702	46.3964	4.1688	27.0511	1.57176	27.0439	2.51096			394.377	28.6499	2.70511	32.8543	3.27139	32.571	2.6129	33.928	1.95239
	395.761	80.9062	5.23886	86.6511	7.12848	43.6844	2.96936	40.489	3.53133			395.761	41.3051	4.235	46.6471	4.20997	27.1432	1.58551	27.1827	2.50144			395.761	28.7122	2.82274	33.1964	3.14196	32.0601	2.5038	34.4706	2.08708
	397.145	80.9619	5.33748	86.2584	7.32859	43.6936	2.87024	40.2561	3.59517			397.145	41.5541	4.23757	46.5996	4.32145	27.0838	1.52768	27.1873	2.54045			397.145	28.3391	2.78604	33.0791	3.13006	32.1283	2.58559	34.6484	2.25009
	398.528	80.5344	5.44097	87.4468	7.38621	44.0069	2.82858	40.4294	3.59217			398.528	41.5929	4.26515	46.9696	4.45821	27.2422	1.5483	27.2273	2.53743			398.528	28.3064	2.75833	33.425	2.99495	32.6111	2.68806	34.5519	2.35416
	399.912	80.009	5.36182	88.3405	7.43133	43.9559	2.66602	40.3106	3.60526			399.912	41.4978	4.21213	47.3552	4.44688	27.427	1.62122	27.2963	2.5924			399.912	28.6515	2.99138	33.7791	3.00425	32.7891	2.71129	34.9435	2.47176
	401.296	79.7806	5.14389	87.7945	7.53814	44.1085	2.72736	40.0984	3.61867			401.296	41.624	4.24294	47.6483	4.52888	27.3736	1.62357	27.536	2.62349			401.296	28.8485	3.19183	33.4616	2.98485	32.8729	2.95259	35.2719	2.55237
	402.68	79.6142	5.21867	87.4277	7.51199	43.7147	2.83699	40.2879	3.56385			402.68	41.769	4.32627	48.0767	4.55807	27.5672	1.64624	28.0224	2.74937			402.68	29.3421	3.25053	33.5357	3.11282	32.662	2.91724	35.3814	2.62632
	404.064	79.2093	5.34518	87.392	7.58627	43.5867	2.67653	40.2835	3.71734			404.064	41.777	4.42267	48.0786	4.58333	27.6477	1.73682	28.3985	2.83286			404.064	29.6551	3.16775	33.3086	3.30416	32.3031	2.65718	35.4404	2.6138
	405.447	78.5385	5.25654	87.011	7.38485	43.8761	2.6647	40.3944	3.83514			405.447	42.5198	4.56432	48.0323	4.79709	27.5757	1.77959	28.4219	2.82252			405.447	29.5119	3.1409	33.2969	3.30142	32.3186	2.78836	35.8358	2.61102
	406.831	78.5453	5.27783	86.7795	7.28951	43.4543	2.73855	40.4785	3.74726			406.831	42.6584	4.66492	48.2837	4.85547	27.496	1.69062	28.4672	2.84753			406.831	29.5263	3.13272	33.2762	3.2695	32.3874	2.96907	35.9459	2.48649
	408.215	77.7056	5.14046	86.8752	7.11367	43.7961	2.71084	40.2779	3.69115			408.215	42.6762	4.72145	48.5944	5.0215	27.4106	1.63305	28.3589	2.83892			408.215	29.4866	3.09959	33.0701	3.18357	32.2307	3.03982	35.6581	2.25465
	409.599	78.1323	5.03737	87.1079	7.38544	43.8441	2.66037	40.132	3.64957			409.599	42.9018	4.73944	48.7701	5.13864	27.5441	1.66014	28.1584	2.7815			409.599	29.5702	2.98041	33.1445	3.22758	31.9006	2.95176	35.7008	2.23454
	410.982	78.7945	5.10101	86.6999	7.66998	43.2287	2.65297	39.7898	3.57439			410.982	43.2216	4.79732	48.7284	5.09814	27.3081	1.61647	28.1422	2.74522			410.982	29.7428	2.76208	33.2021	3.38178	31.9239	3.02904	35.8579	2.32696
	412.366	78.4337	5.24904	87.0814	7.95399	43.2531	2.76134	39.3361	3.48705			412.366	43.3752	4.84729	48.4193	4.92888	27.0642	1.64518	28.4172	2.82685			412.366	29.563	2.72735	33.0761	3.38295	31.7873	3.01074	36.0202	2.37319
	413.75	78.3006	5.3744	87.9862	8.02921	43.4608	2.74283	39.4545	3.47291			413.75	43.3719	4.69178	48.4142	4.76866	27.2354	1.64619	28.4668	2.86647			413.75	29.1911	2.67989	33.5432	3.22831	32.3029	2.90376	35.8893	2.46996
	415.134	78.3289	4.94471	88.3114	7.75037	43.3542	2.60991	39.6029	3.43629			415.134	43.6331	4.65307	48.4117	4.64087	27.3238	1.5887	28.435	2.72542			415.134	28.8419	2.63098	33.8348	3.38981	33.0647	2.8523	35.4637	2.57281
	416.518	78.2612	5.22467	88.1192	7.44564	43.6527	2.59885	39.5667	3.47769			416.518	43.5381	4.62384	48.6971	4.78227	27.4597	1.60104	28.4822	2.71004			416.518	29.2575	2.59567	33.9272	3.86742	33.4315	2.79821	34.9575	2.56431
	417.901	77.6155	5.15594	88.1373	7.55826	43.8887	2.72261	39.9578	3.43349			417.901	43.5939	4.60271	49.2548	4.96157	27.3661	1.63227	28.5287	2.7056			417.901	29.2879	2.53632	34.0038	3.93524	33.4121	2.68071	34.7876	2.45215
	419.285	77.9681	5.28711	88.3242	7.61307	43.6868	2.65726	40.1902	3.46846			419.285	43.7566	4.55376	49.4993	4.93872	27.3787	1.59231	28.5329	2.64695			419.285	29.4436	2.70969	33.8023	3.66207	33.5453	2.61332	35.1124	2.45253
	420.669	78.2707	5.45973	88.6032	7.76031	43.4912	2.67384	40.1983	3.32505			420.669	44.3022	4.64891	49.5351	4.99031	27.484	1.50916	28.4421	2.60185			420.669	29.7349	2.85093	33.9437	3.54879	33.5623	2.60116	35.6065	2.29992
	422.053	77.7869	5.32749	88.5688	7.62042	43.6878	2.69139	40.2003	3.2707			422.053	44.4049	4.66307	49.7831	4.94422	27.3186	1.54423	28.4339	2.5846			422.053	29.9439	2.77932	34.6421	3.64967	33.8229	2.43722	35.5281	2.26995
	423.436	77.2659	5.17768	88.2152	7.55618	43.9796	2.71388	40.192	3.32303			423.436	44.5788	4.69431	49.9014	5.10677	27.2175	1.57798	28.4323	2.60425			423.436	29.8332	2.71194	34.9121	3.76753	33.9937	2.29225	35.5852	2.29778
	424.82	77.1334	5.00113	88.5168	7.44134	43.2546	2.80449	40.2263	3.32614			424.82	44.678	4.70106	50.0585	5.28907	27.3981	1.56809	28.427	2.57525			424.82	29.864	2.69533	34.8239	3.82805	33.6052	2.21902	35.649	2.30979
	426.204	77.1968	4.81449	89.2421	7.32796	43.0244	2.83741	40.2122	3.39297			426.204	44.749	4.70525	50.1265	5.19233	27.2288	1.56328	28.2731	2.47025			426.204	30.1674	2.62149	34.8376	3.68012	33.1092	2.23184	35.0079	2.25342
	427.588	77.2344	4.73245	88.8605	7.35776	43.1511	2.77673	40.2924	3.3944			427.588	44.6427	4.54146	50.2479	5.07729	26.924	1.55136	28.3643	2.46756			427.588	30.0667	2.67649	34.5428	3.46383	32.5752	2.37756	34.563	2.12816
	428.972	77.2351	4.99103	88.1167	7.04739	43.2791	2.77933	40.4103	3.42297			428.972	44.5688	4.43792	50.4124	5.20566	26.9846	1.59481	28.3451	2.43787			428.972	29.9888	2.7969	34.2882	3.66761	32.182	2.47485	34.8125	2.21469
	430.355	77.7438	4.68548	88.3254	6.96039	42.9192	2.81671	40.922	3.29776			430.355	44.786	4.56732	50.6324	5.28224	27.1408	1.58908	28.5474	2.48391			430.355	30.2375	2.97451	34.2906	3.77361	31.5976	2.38572	35.1438	2.31023
	431.739	77.0672	4.60003	88.9461	7.43374	42.4715	2.83565	41.3152	3.09116			431.739	44.8067	4.65004	50.5686	5.28865	27.1029	1.64266	28.5267	2.48474			431.739	30.3964	3.08621	34.129	3.71221	31.0388	2.4787	35.3521	2.38296
	433.123	76.7103	4.61049	88.5579	7.65923	42.7055	2.83492	40.7648	3.08184			433.123	45.1132	4.85181	50.4355	5.30114	27.1152	1.65257	28.6617	2.49418			433.123	29.9471	2.91033	34.3103	3.82666	31.1889	2.55851	35.2069	2.47584
	434.507	76.728	4.91071	88.7093	7.36735	42.617	2.81618	40.234	3.2251			434.507	45.2919	4.99656	50.8101	5.57171	27.053	1.63342	28.6996	2.50355			434.507	30.0908	2.88759	34.8948	3.97121	31.6945	2.64867	35.4984	2.5768
	435.89	77.2125	5.03116	90.3167	7.37441	42.3136	2.8549	40.6064	3.25903			435.89	45.238	4.95739	51.2307	5.71765	26.9713	1.59128	28.6279	2.52772			435.89	30.5948	2.96957	34.9415	3.9431	31.7475	2.56697	35.336	2.64038
	437.274	76.713	5.16876	90.6238	7.55941	42.5585	2.72824	39.971	3.09723			437.274	45.2243	4.9117	51.6471	5.88649	26.9547	1.54072	28.3378	2.48982			437.274	30.8363	2.97755	34.8357	3.90863	31.709	2.46492	34.754	2.52144
	438.658	76.6298	4.75848	90.5459	7.60097	42.6624	2.68991	39.5104	3.01747			438.658	45.468	4.91775	51.5747	5.81096	26.8917	1.47983	28.3794	2.48103			438.658	30.6523	2.8873	35.3329	3.91199	31.7548	2.29238	34.4258	2.46451
	440.042	76.7488	4.50683	91.2694	7.51855	42.4781	2.8385	39.6344	3.22632			440.042	45.4893	5.028	51.7938	5.87111	26.888	1.55861	28.4841	2.57182			440.042	30.6618	2.79484	35.7576	3.85306	32.2002	2.37533	34.0068	2.5768
	441.426	77.876	4.93731	91.2193	7.39558	42.5786	2.89195	39.8817	3.25129			441.426	45.7003	5.20336	52.4647	6.05367	26.9427	1.5955	28.452	2.57089			441.426	30.6282	2.83487	36.2453	3.91993	32.4287	2.47151	33.8653	2.44932
	442.809	77.8214	5.17723	91.0822	7.10161	42.638	2.76194	39.7421	3.01522			442.809	45.7759	5.13129	52.5957	6.03505	27.0034	1.60283	28.5065	2.49217			442.809	30.0977	2.94455	36.1443	3.99603	32.0751	2.46824	33.4591	2.37715
	444.193	77.5955	5.11493	90.7962	7.03052	42.4314	2.62008	39.6368	3.01889			444.193	46.3004	5.42155	52.3339	5.99357	26.863	1.57798	28.483	2.47387			444.193	29.7847	2.87201	35.9571	3.8632	31.9331	2.46953	33.4841	2.46598
	445.577	78.234	5.05059	91.9915	7.38827	42.3036	2.66231	39.6996	3.05458			445.577	46.4076	5.44464	52.259	6.1092	26.6909	1.41635	28.5602	2.5464			445.577	29.9511	2.97577	35.7538	3.76606	31.9043	2.41026	33.7016	2.55225
	446.961	77.7209	5.03584	92.4386	7.63011	42.3878	2.70737	39.21	2.95226			446.961	46.3007	5.39392	52.6484	6.4892	26.612	1.405	28.6112	2.51742			446.961	29.8809	2.95917	35.6764	3.91048	31.398	2.17229	34.0529	2.65139
	448.344	77.3764	5.56309	91.9791	7.48208	42.3985	2.68164	39.2345	2.99076			448.344	46.791	5.55816	53.213	6.86505	26.5985	1.389	28.3724	2.4356			448.344	29.838	3.06833	35.5773	4.06117	31.2959	2.03091	34.0833	2.73448
	449.728	78.1443	5.13898	91.3986	7.32339	42.4214	2.68371	39.3501	2.95411			449.728	47.3588	5.71859	53.4284	7.17738	26.7482	1.42107	28.2595	2.4637			449.728	29.9963	3.10089	35.2842	4.05482	31.3561	1.82124	33.2923	2.65292
	451.112	78.3402	5.3094	91.2997	7.35789	42.3183	2.64088	39.2783	2.92397			451.112	47.1152	5.79012	53.3708	7.47414	26.6379	1.46476	28.1237	2.4106			451.112	29.9064	2.94736	35.2143	4.0452	31.134	1.72876	33.524	2.66191
	452.496	78.2044	4.94645	90.7222	7.5301	42.221	2.74578	39.4918	2.91488			452.496	46.9004	5.75676	52.8012	7.51327	26.381	1.45952	28.3464	2.42914			452.496	29.9312	2.88343	34.9694	4.13164	30.6631	1.82111	33.7437	2.68541
	453.88	78.129	4.8327	89.4115	7.30116	42.0567	2.83921	39.3194	2.87841			453.88	46.9897	5.62279	53.1693	7.72451	26.3492	1.45414	28.4859	2.46115			453.88	30.1727	3.06568	34.8258	4.17702	30.4208	1.95001	33.4819	2.64318
	455.263	77.7287	4.93535	89.6221	7.33037	41.9979	2.92799	39.1309	2.95828			455.263	46.5833	5.52188	53.5486	7.91298	26.3819	1.43992	28.4752	2.48661			455.263	30.1449	3.15264	35.0844	4.42217	30.6678	2.25066	33.4337	2.54171
	456.647	77.1274	4.87047	90.0038	7.5759	42.4468	2.95779	38.9098	2.97788			456.647	46.4496	5.49294	53.3586	8.13619	26.4402	1.50342	28.1472	2.47914			456.647	30.0129	3.24555	35.2269	4.70992	30.7078	2.39834	33.1459	2.337
	458.031	76.818	4.60431	90.8132	7.79513	42.4277	2.9497	38.5855	2.9097			458.031	46.3883	5.5678	53.2895	8.21329	26.5291	1.53372	27.8389	2.37619			458.031	30.2121	3.30784	35.0124	4.73187	30.5237	2.30304	32.8103	2.205
	459.415	76.0238	4.20368	90.3933	7.80604	42.0941	3.07093	38.6033	2.90854			459.415	46.2945	5.66167	53.2316	8.36648	26.4954	1.48905	27.7369	2.36292			459.415	30.3405	3.25049	34.3047	4.5582	30.4133	2.18494	32.0535	2.09874
	460.799	76.2568	4.37921	90.3599	7.49441	42.1146	2.91638	38.9522	2.8078			460.799	46.2384	5.67067	52.8044	8.28817	26.2609	1.39682	27.6637	2.33383			460.799	30.1906	3.26671	34.1598	4.64109	30.2191	2.23773	32.0202	2.04127
	462.182	75.6673	4.15467	90.1044	7.3419	42.3016	2.87447	38.5426	2.93349			462.182	45.7296	5.54677	52.6761	8.16935	26.1806	1.40455	27.6728	2.36384			462.182	30.3554	3.33647	34.3614	4.89529	29.734	2.29956	31.7202	2.03717
	463.566	75.7604	4.07363	90.0257	7.136	42.2704	2.89614	38.2269	2.92522			463.566	45.5497	5.47655	52.7938	8.3324	26.2284	1.43482	27.6097	2.38645			463.566	30.4578	3.30901	34.8385	4.97189	29.5525	2.30351	31.533	2.03971
	464.95	75.7099	3.94611	89.6787	7.04415	42.199	2.86377	38.2203	2.82028			464.95	45.3501	5.31471	52.7806	8.27277	26.3048	1.40331	27.3606	2.32103			464.95	30.4178	3.32668	34.8207	5.0069	29.4636	2.33023	31.3989	2.00279
	466.334	75.3008	4.1298	89.6207	7.01769	42.0169	2.9937	38.0547	2.71253			466.334	45.0034	5.24262	52.1653	8.18758	26.195	1.38495	27.0828	2.30159			466.334	30.2412	3.29259	34.7033	4.98915	29.5967	2.32007	30.9674	1.97294
	467.717	75.5093	4.49595	88.6698	7.24088	41.8971	2.94298	38.412	2.68864			467.717	44.8252	5.22447	51.2997	8.06243	26.0676	1.39202	26.76	2.23545			467.717	30.3311	3.28682	34.4819	4.92438	29.5019	2.2785	30.8252	2.1333
	469.101	75.1723	4.05802	88.4343	7.51437	41.8818	2.82098	38.2471	2.82783			469.101	44.7785	5.27163	51.4189	8.07153	26.0811	1.36301	26.7076	2.18762			469.101	29.949	3.27294	34.6861	4.98186	29.5583	2.31237	30.7045	2.18383
	470.485	74.9358	3.88366	88.4246	7.33841	41.9762	2.7821	37.9961	2.73027			470.485	44.5043	5.17775	51.576	8.32695	26.1501	1.32025	26.6931	2.20568			470.485	29.4825	3.20019	34.5863	5.04075	29.8665	2.33881	30.8607	2.06211
	471.869	74.9267	3.64265	88.0761	7.3581	41.8411	2.84164	37.9048	2.76599			471.869	44.2726	5.15713	51.1944	8.35855	25.9693	1.28329	26.5173	2.13556			471.869	29.164	3.0856	34.1931	4.80124	29.6474	2.26118	30.9328	1.98812
	473.253	74.8123	3.56153	88.5129	7.84096	41.8206	2.85941	38.1734	2.84725			473.253	43.7694	5.01444	51.1148	8.37182	26.0071	1.27749	26.3874	2.08766			473.253	28.9907	3.05619	34.0628	4.73237	29.2563	2.17373	30.6243	1.92722
	474.636	74.7551	3.50559	88.1972	7.97151	41.9284	2.85219	38.0417	2.87962			474.636	43.6277	4.97872	50.7068	8.47799	26.0635	1.24831	26.2495	2.03964			474.636	28.4856	2.97869	34.029	4.81373	28.8648	2.02515	30.0808	1.94088
	476.02	74.0113	3.35997	88.0238	7.85883	41.9284	2.88732	37.8951	2.78479			476.02	43.0137	4.80953	50.0404	8.45337	25.8908	1.24378	26.3087	2.06403			476.02	28.6667	3.0123	34.0124	4.90431	28.2325	1.88963	30.031	1.98986
	477.404	73.8987	3.28436	87.754	7.77382	41.7579	2.91935	37.5411	2.69394			477.404	42.7945	4.73233	49.6537	8.30318	25.6822	1.22557	26.3825	2.11071			477.404	29.0007	3.05307	33.6646	4.53494	27.8131	1.80983	29.9635	1.95607
	478.788	73.5323	3.56553	86.1659	7.89999	41.9806	2.86333	37.7929	2.74997			478.788	42.5506	4.59404	48.964	8.15004	25.5838	1.16836	26.1952	2.05625			478.788	28.8219	3.13842	33.3339	4.45844	27.708	1.83319	29.5884	2.02692
	480.171	72.8094	3.08653	85.5294	7.73947	41.9483	2.78216	37.8771	2.71767			480.171	42.0523	4.55385	48.4377	7.9759	25.7491	1.17196	25.9402	1.99119			480.171	28.5597	3.21142	33.6163	4.74651	27.6298	1.81358	29.3813	2.11841
	481.555	72.8238	2.97546	86.235	7.44703	41.4825	2.83687	37.0484	2.79381			481.555	41.6226	4.38594	48.1952	7.99023	25.8945	1.14607	25.7475	1.95415			481.555	28.3083	3.19438	33.4115	4.94084	27.2014	1.63823	29.1587	2.23817
	482.939	72.9544	3.51365	85.4762	7.24539	41.5961	2.8965	36.893	2.8631			482.939	41.6305	4.377	48.0203	7.93071	25.643	1.16225	25.7768	1.97305			482.939	28.162	3.1697	33.2734	4.91551	26.7947	1.49072	28.9508	2.31401
	484.323	72.4465	3.48	85.6167	7.38566	41.6745	2.89787	37.028	2.90394			484.323	41.2472	4.36014	47.9458	7.81215	25.437	1.17685	25.5919	1.93464			484.323	28.1392	3.11637	33.2425	4.92335	27.0553	1.61939	29.1555	2.22769
	485.707	72.6161	3.49519	85.6432	7.58924	41.4018	2.7671	36.6485	2.97672			485.707	40.9744	4.15674	47.6421	7.81154	25.5509	1.18377	25.3216	1.91319			485.707	27.9999	3.10743	33.3476	5.03048	27.3098	1.79244	28.7507	1.97788
	487.09	73.415	3.55497	85.1939	7.54829	41.6793	2.72688	36.4366	3.02928			487.09	40.764	4.09295	47.2647	7.82854	25.6817	1.23055	25.1815	1.87679			487.09	27.5672	3.02541	33.1553	4.88211	27.7175	1.80762	28.3571	1.80105
	488.474	73.1365	3.70619	84.7807	7.20494	41.7873	2.74912	36.3072	3.00317			488.474	40.2043	4.03211	46.72	7.56711	25.6917	1.23384	24.9385	1.8318			488.474	27.3439	3.02978	32.9065	4.68729	28.3354	1.77048	28.3413	1.94802
	489.858	73.4165	3.71132	84.4806	6.79772	41.4743	2.63452	35.8515	2.99423			489.858	39.8667	3.87863	46.4885	7.32109	25.7534	1.2395	24.7513	1.83225			489.858	27.414	3.15988	32.8443	4.58073	28.6115	1.8675	28.296	1.98318
	491.242	72.9616	3.52755	84.8407	6.6704	41.1114	2.66531	35.6437	2.94872			491.242	39.5325	3.81904	46.3636	7.47622	25.6402	1.22092	24.4802	1.79623			491.242	27.4647	3.11944	32.662	4.46609	28.1896	1.88941	28.3877	1.96761
	492.625	73.0101	3.72446	84.3911	6.95083	41.1993	2.66736	35.3805	2.99988			492.625	39.2012	3.68072	46.0128	7.33517	25.6487	1.33072	24.3713	1.79195			492.625	27.4472	2.95685	31.9387	4.38671	27.699	1.79166	28.3137	1.95801
	494.009	72.5465	3.93814	83.6092	6.99314	41.4769	2.65467	35.4287	2.83166			494.009	39.0191	3.70094	45.9372	7.27664	25.7444	1.38089	24.2062	1.81189			494.009	27.2593	2.79674	31.1584	4.30918	27.3433	1.73297	28.2055	1.99815
	495.393	72.3743	3.62652	83.7302	7.08879	41.2651	2.71144	35.6013	2.9057			495.393	38.9292	3.75648	45.6877	7.4585	25.6989	1.33365	23.9355	1.78012			495.393	27.1426	2.82917	30.8651	4.28768	26.7497	1.69611	28.6574	2.0812
	496.777	71.5933	3.39716	83.8783	7.31644	40.852	2.67867	35.5045	3.08359			496.777	38.673	3.67014	45.4812	7.44948	25.6752	1.28896	23.9478	1.78117			496.777	27.0292	2.93474	30.8407	4.2032	26.1989	1.69224	28.4287	2.02476
	498.161	71.5767	3.44368	83.8148	7.09142	40.9515	2.72816	35.2507	3.09173			498.161	38.3194	3.59899	45.1014	7.37163	25.7773	1.30451	23.8952	1.79404			498.161	26.6548	2.93249	31.0143	4.1639	26.0792	1.7621	28.1668	2.03042
	499.544	71.1089	3.81056	83.0647	6.64556	40.8621	2.56	35.0275	3.22534			499.544	37.9508	3.5028	45.0475	7.39963	25.8701	1.35705	23.7082	1.79405			499.544	26.1777	2.77938	31.0194	4.16457	25.9705	1.79229	27.774	1.96096
	500.928	71.1608	3.62769	82.4374	6.61006	40.8422	2.59348	35.5212	3.14674			500.928	37.8408	3.55427	45.0719	7.50826	25.7787	1.35295	23.7247	1.76805			500.928	26.1695	2.72025	30.9468	4.32217	25.7399	1.75645	27.7744	1.96884
	502.312	71.3089	3.26263	81.8361	6.61583	40.4312	2.82899	34.9974	3.15309			502.312	37.6016	3.53797	45.0901	7.73298	25.5642	1.3226	23.5974	1.74045			502.312	26.4117	2.77496	30.866	4.51756	25.8308	1.75912	28.0325	2.06707
	503.696	71.6496	3.3047	81.9399	6.76501	39.8783	2.90032	34.6856	3.15961			503.696	37.5046	3.43573	44.8235	7.98258	25.2657	1.3005	23.3384	1.7511			503.696	26.3242	2.78034	30.3172	4.33611	26.0241	1.75353	28.2173	2.07456
	505.079	70.9012	3.27502	81.4921	6.89758	39.8539	2.83927	34.6559	3.1689			505.079	37.5597	3.36618	44.48	7.72351	25.1011	1.2818	23.3092	1.7957			505.079	26.1865	2.9261	30.1631	4.1609	25.9737	1.70833	27.8749	1.98786
	506.463	70.71	3.47667	80.5138	6.50619	40.0946	2.7226	34.6077	3.21446			506.463	37.215	3.2577	44.0075	7.37378	25.2748	1.29123	23.3085	1.83662			506.463	26.2504	2.99414	30.372	4.26952	25.6934	1.75633	27.317	1.98324
	507.847	71.1899	4.13238	79.7471	6.10385	40.251	2.67161	34.6511	3.30844			507.847	36.8442	3.09324	43.6736	7.30324	25.2137	1.25821	23.067	1.77644			507.847	26.3482	2.88786	30.2956	4.25251	25.6074	1.90393	27.4575	2.03131
	509.231	71.0845	4.17702	79.0901	6.15735	40.014	2.77215	34.7412	3.29112			509.231	36.8671	3.04395	43.5503	7.34933	25.1655	1.28262	23.1201	1.80888			509.231	25.954	2.86745	30.2014	4.15725	26.0932	2.14729	27.5165	2.05408
	510.615	70.6872	4.31393	78.8789	6.44472	39.6626	2.66583	34.6939	3.19651			510.615	36.4778	3.00171	43.7303	7.38155	25.2371	1.28328	23.1279	1.85019			510.615	25.6872	2.88777	30.0566	4.21942	26.0125	2.25331	27.6965	1.98355
	511.998	70.7065	4.84155	79.5716	6.46616	39.3989	2.48876	34.7314	3.19175			511.998	36.2904	2.9154	43.3616	7.30472	25.128	1.2593	23.0791	1.86341			511.998	25.583	2.9459	29.4976	4.14771	25.8467	2.1899	28.0946	1.84703
	513.382	70.3982	4.87545	78.9533	6.45444	39.2679	2.54657	34.5097	3.20749			513.382	36.0801	2.85039	42.7466	7.19004	25.0805	1.23709	23.0857	1.91385			513.382	25.7368	3.07402	29.1123	4.05415	25.8607	2.08961	28.1564	1.76529
	514.766	69.361	4.76357	78.1192	6.1681	39.2515	2.55883	34.5467	3.28351			514.766	35.7205	2.8473	42.9187	7.11007	24.9684	1.2256	22.9644	1.92596			514.766	25.5802	3.13041	29.0304	4.00701	25.704	1.97323	28.2252	1.64275
	516.15	69.825	4.56511	78.2559	6.32115	39.128	2.66264	34.6135	3.22283			516.15	35.5974	2.82646	42.9071	7.09818	24.8361	1.21612	22.9365	1.93639			516.15	25.2419	2.98416	28.9663	4.04092	25.4055	1.95932	28.2749	1.59296
	517.533	69.7919	4.20301	77.5019	6.20249	38.797	2.70079	34.3665	3.22408			517.533	35.1546	2.71755	42.8887	7.18837	24.812	1.18815	22.892	1.93469			517.533	24.9749	2.85449	28.9287	4.13796	25.0095	1.9887	28.0152	1.63977
	518.917	69.5153	4.41466	76.8755	5.82882	38.9393	2.71367	34.0073	3.19895			518.917	34.9706	2.74312	42.4137	6.96555	24.7516	1.17066	22.9466	1.94482			518.917	24.8467	2.93861	28.9215	4.14089	24.9014	2.0333	28.0976	1.63488
	520.301	69.7133	4.73866	76.3899	5.90391	38.9788	2.80462	34.1593	3.12161			520.301	35.3345	2.79082	41.9153	6.71759	24.6362	1.15221	22.9267	1.95319			520.301	24.9837	3.03364	28.7732	4.03206	25.2912	2.07791	28.1157	1.62007
	521.685	69.749	5.06934	75.7934	6.12081	38.6335	2.70025	33.9756	3.07064			521.685	35.1637	2.75633	41.7071	6.62018	24.6712	1.15459	22.8301	1.9464			521.685	24.6712	2.84135	28.9696	3.91388	25.3814	2.08426	27.8254	1.56295
	523.069	68.7925	4.81088	75.7125	6.24157	38.1504	2.48187	33.5326	3.20487			523.069	34.9064	2.70897	41.4899	6.64015	24.5776	1.08973	22.5059	1.90097			523.069	24.466	2.7881	28.9718	3.76575	25.4124	2.10122	27.518	1.56446
	524.452	68.4242	4.70802	74.8295	5.82309	38.3448	2.50466	33.8687	3.33913			524.452	34.9403	2.80264	40.8987	6.42519	24.2845	1.09422	22.3752	1.82658			524.452	24.5542	2.71207	28.3258	3.54483	25.2528	2.02626	27.4946	1.62918
	525.836	68.7709	4.81915	74.3979	5.33868	38.3452	2.46315	34.1565	3.43301			525.836	34.8982	2.85106	40.4087	6.1403	24.2454	1.08188	22.565	1.84944			525.836	25.0181	2.67674	28.0839	3.52308	24.9043	1.94993	28.0749	1.6656
	527.22	68.5348	4.75422	73.7994	5.49946	37.9834	2.61282	33.8275	3.44595			527.22	35.0071	2.95858	40.5063	6.23707	24.2031	1.12517	22.7163	1.86909			527.22	25.2473	2.76007	28.0056	3.49128	24.733	1.99169	27.9472	1.6415
	528.604	68.1896	4.87884	73.0109	5.45003	38.0148	2.64517	33.8036	3.34942			528.604	34.7928	2.89055	40.1587	6.31157	24.3313	1.16274	22.4791	1.86939			528.604	25.0092	2.78118	27.6314	3.47999	24.6292	1.90836	27.862	1.87525
	529.987	68.0482	4.37132	72.5476	5.16314	37.8131	2.59887	33.3629	3.302			529.987	34.5932	2.74327	39.4369	6.14505	24.2893	1.15177	22.4343	1.90001			529.987	25.0225	2.73558	27.4571	3.62849	24.6599	1.75101	28.0712	2.05356
	531.371	67.277	4.13741	72.327	5.40004	37.8811	2.66955	33.3422	3.33187			531.371	34.4929	2.71108	38.8073	6.03333	24.0826	1.17836	22.3592	1.89894			531.371	24.7906	2.64779	27.3588	3.68996	24.6859	1.88691	28.2704	2.07105
	532.755	66.8338	4.20804	71.5022	5.5977	38.2382	2.72429	33.2342	3.3437			532.755	34.3923	2.66142	38.3216	5.88866	23.9616	1.12636	22.2807	1.96317			532.755	24.3879	2.66858	27.5719	3.8834	24.4427	1.90493	28.0788	2.08749
	534.139	66.4511	4.3532	71.7973	5.403	37.7646	2.70265	32.9763	3.45596			534.139	33.9324	2.6403	38.0419	5.78538	23.8513	1.07735	22.2415	1.94918			534.139	24.2964	2.60539	27.5184	3.88446	24.3247	1.81963	27.8234	2.19119
	535.523	64.8012	3.77957	72.3086	5.27116	37.4727	2.61154	33.1138	3.4777			535.523	33.5339	2.63512	38.1362	5.85655	23.7816	1.12105	22.2226	1.9405			535.523	23.9933	2.60537	27.4627	3.74455	24.219	1.77637	28.2006	2.20036
	536.906	63.67	3.51556	72.4356	5.44552	37.5279	2.71586	32.9294	3.54072			536.906	33.014	2.53569	38.168	5.82199	23.8222	1.1299	22.3139	2.04298			536.906	23.6668	2.63036	27.7934	3.73697	24.1642	1.74521	28.2973	2.15697
	538.29	63.3711	3.55074	72.1101	5.44397	37.108	2.69771	32.8444	3.41523			538.29	32.8736	2.56819	37.8298	5.68892	23.9228	1.12403	22.2773	2.02292			538.29	23.7557	2.71668	27.8471	3.63111	24.2917	1.91162	28.0186	2.11738
	539.674	63.7281	3.89973	71.1096	4.99429	37.2735	2.71409	32.7817	3.46928			539.674	32.4588	2.43063	37.2529	5.55141	23.9443	1.21787	22.3156	1.94602			539.674	23.8025	2.74094	27.8157	3.61106	24.7641	2.22782	27.7536	1.9996
	541.058	63.5874	3.77944	70.8163	4.99363	37.0852	2.76182	32.7937	3.63367			541.058	32.1915	2.46055	37.2063	5.46771	23.8777	1.18268	22.2318	1.96801			541.058	23.5711	2.72624	27.8523	3.70169	24.9752	2.37942	27.6667	2.05687
	542.441	62.9086	3.64111	70.7707	5.12111	37.0057	2.74794	32.8181	3.67362			542.441	32.2038	2.49186	37.0725	5.4232	23.8604	1.16013	22.0854	1.91891			542.441	23.5303	2.73383	27.9446	3.65455	24.3957	2.20141	27.2392	1.97665
	543.825	61.8685	3.51115	70.7332	4.94888	37.1361	2.79006	32.4203	3.5048			543.825	32.1298	2.45373	36.4671	5.13486	23.8929	1.2278	22.0407	1.91689			543.825	23.3323	2.73863	27.7751	3.43154	24.0066	2.06798	27.3138	1.99238
	545.209	62.0438	3.38651	70.6746	4.97676	37.2244	2.78635	32.1478	3.537			545.209	31.9856	2.51532	36.4556	5.15212	23.8482	1.31442	22.1465	1.97997			545.209	22.9538	2.76528	27.7009	3.34733	24.1188	1.98348	27.667	2.22269
	546.593	61.7305	3.4415	70.2335	5.18229	36.8774	2.85017	32.3654	3.64844			546.593	31.8721	2.63177	36.3959	5.21257	23.6718	1.32131	22.098	2.01791			546.593	23.097	2.75551	27.4086	3.32741	24.1747	1.84906	27.7441	2.31508
	547.977	61.3083	3.26348	70.2831	5.36689	37.052	2.94421	32.3204	3.61975			547.977	31.8607	2.72698	36.203	5.17735	23.6814	1.31379	21.8475	1.93233			547.977	23.1784	2.72106	26.8846	3.32464	24.1027	1.83571	27.5683	2.24796
	549.36	61.3031	3.00984	70.4483	5.16735	37.4913	2.93363	32.1592	3.52018			549.36	31.7039	2.73527	36.2942	5.23654	23.5379	1.32358	21.692	1.95145			549.36	23.014	2.76204	26.7125	3.43674	23.833	1.71742	27.6059	2.17412
	550.744	60.9353	3.07915	69.8303	5.34987	37.3222	2.89314	32.0035	3.49266			550.744	31.6811	2.75055	36.0717	5.20208	23.3689	1.34824	21.5932	1.9846			550.744	22.8532	2.90683	26.4256	3.55866	23.662	1.67083	27.7676	2.18466
	552.128	60.3044	3.02653	68.7596	5.33889	36.9974	2.80848	31.7934	3.45515			552.128	31.3211	2.6747	36.0028	5.2263	23.3267	1.33099	21.4163	1.94046			552.128	22.8488	2.93619	26.3203	3.68235	23.537	1.73455	27.6524	2.16899
	553.512	60.2094	3.01082	69.7812	4.98718	36.5135	2.81107	31.5551	3.38489			553.512	30.8961	2.64951	36.1304	5.25177	23.2356	1.30701	21.4001	1.92455			553.512	22.5335	2.87983	26.5652	3.68274	23.398	1.71028	27.2707	2.14636
	554.895	60.2901	2.93127	69.7568	5.11432	36.764	2.90098	31.5555	3.36058			554.895	31.0153	2.74786	36.0387	5.10008	23.3195	1.36121	21.3738	1.95644			554.895	22.4696	2.91222	26.7146	3.76897	23.7187	1.69538	26.8194	2.04522
	556.279	59.4724	3.063	69.4941	5.28025	36.9012	2.93375	31.2741	3.38675			556.279	30.7591	2.68839	35.7109	4.8838	23.3682	1.3698	21.1993	1.92582			556.279	22.3561	2.7054	26.9289	3.6986	23.8596	1.9462	26.6242	1.90694
	557.663	59.5128	3.05733	69.0717	5.14023	36.5616	2.85563	31.1429	3.3388			557.663	30.6387	2.6454	35.3482	4.81873	23.3773	1.40493	21.1239	1.95268			557.663	22.6365	2.74067	26.7274	3.47881	24.2153	2.21289	26.7933	1.85136
	559.047	59.2381	2.89097	68.2565	5.22006	36.5895	2.96237	31.5467	3.24985			559.047	30.7891	2.66908	35.4212	4.82791	23.3551	1.4137	21.0758	1.98069			559.047	22.6255	2.71302	26.2158	3.3839	24.3225	2.18249	26.4394	1.84809
	560.431	58.5557	2.70614	68.2582	4.90791	36.8715	2.93836	31.4639	3.25042			560.431	30.9606	2.71723	35.357	4.83214	23.4051	1.3976	20.9284	1.9464			560.431	22.5188	2.60057	25.8055	3.30655	24.3372	2.11898	26.2036	1.84073
	561.814	59.2549	2.70046	68.5029	4.94392	36.7559	2.86988	31.1782	3.2849			561.814	30.8276	2.70363	35.1058	4.67189	23.3025	1.42389	20.6816	1.96491			561.814	22.8119	2.71301	25.9146	3.40192	24.4818	2.20813	26.3706	1.80899
	563.198	58.8633	2.81287	68.1295	5.07597	36.0225	2.95706	31.0221	3.30751			563.198	30.9067	2.70451	35.0043	4.42526	23.163	1.4523	20.5413	2.049			563.198	22.8299	2.78837	25.741	3.36001	24.2938	2.15461	26.2953	1.9528
	564.582	58.8241	2.9848	67.8108	4.68099	36.154	2.99718	30.7895	3.28807			564.582	30.8898	2.69656	34.8354	4.40978	23.096	1.41067	20.4447	2.03748			564.582	23.2609	2.96486	25.4052	3.2383	24.2525	2.19004	26.2992	2.06135
	565.966	58.756	2.90094	67.0013	4.65701	36.6675	2.90096	30.5279	3.1845			565.966	30.8582	2.67534	34.6032	4.51211	23.1329	1.44273	20.3538	1.99561			565.966	23.4556	3.03292	25.2385	3.18923	24.2754	2.25531	26.2075	1.99482
	567.35	59.0323	2.75033	67.162	5.37294	36.2813	2.89946	30.3908	3.20231			567.35	30.9131	2.6948	34.5661	4.5156	22.9434	1.54575	20.204	1.95409			567.35	23.2234	2.9887	25.3701	3.2902	24.0143	2.15452	25.8591	1.93789
	568.733	59.21	2.91596	66.7503	5.35179	35.8682	2.96724	30.2877	3.29495			568.733	30.9954	2.74195	34.526	4.45732	22.9502	1.58932	20.2429	1.99745			568.733	23.282	3.07598	25.3136	3.3228	23.7471	2.11628	25.4754	1.79573
	570.117	59.1487	2.89923	67.1971	5.3021	36.3013	3.02494	30.5196	3.13015			570.117	30.7884	2.61339	34.964	4.59505	22.9175	1.57068	20.3025	2.05898			570.117	23.5162	3.16441	25.1421	3.24905	23.5604	2.02634	25.6277	1.73382
	571.501	58.8749	2.87509	67.3973	5.48576	36.2013	3.02406	30.5969	3.21244			571.501	30.7216	2.54142	35.266	4.78447	22.7177	1.55064	20.2729	2.02405			571.501	23.447	3.20535	25.2598	3.10598	23.4244	1.80669	25.7426	1.86091
	572.885	58.7185	3.05785	66.9527	5.6514	36.0451	3.00607	30.4245	3.40809			572.885	30.7844	2.52801	35.1702	4.81905	22.5314	1.47547	20.1504	1.97198			572.885	23.183	3.10234	25.2116	3.12829	23.4325	1.61317	25.7423	2.00704
	574.268	58.6746	3.20632	66.9134	5.98186	35.3881	3.0261	30.4171	3.37769			574.268	30.619	2.45586	34.97	4.88647	22.4331	1.4592	20.0813	1.9616			574.268	22.9572	2.9981	25.1674	3.16333	23.3344	1.58002	25.7006	2.12965
	575.652	58.4762	3.00922	66.9777	5.77681	35.2191	3.19069	30.2407	3.15807			575.652	30.5817	2.57166	35.0272	4.86564	22.3995	1.48091	20.058	1.9679			575.652	22.7437	2.78181	25.1583	3.17549	23.0879	1.66295	25.5938	2.08047
	577.036	58.1359	2.88784	66.7269	5.36843	35.2854	3.21379	30.0931	3.12503			577.036	30.4261	2.55975	35.2453	4.89161	22.4265	1.50459	19.9419	1.97614			577.036	22.6614	2.67229	25.0828	3.34587	23.006	1.68522	25.4372	1.95335
	578.42	57.8932	2.88975	66.1154	5.53875	35.4117	3.14122	29.982	3.20402			578.42	30.2468	2.45658	35.4806	5.04624	22.3398	1.46389	19.8051	1.9587			578.42	22.6583	2.67838	25.0588	3.46017	22.7515	1.62501	25.4562	1.99784
	579.804	57.7005	3.07838	65.8326	5.70093	35.1098	3.11253	29.9109	3.25571			579.804	30.1912	2.46708	35.1902	5.04978	22.2766	1.36647	19.6624	1.8786			579.804	22.7035	2.74978	25.1492	3.44401	22.4938	1.58416	25.3649	1.97481
	581.187	57.6941	2.88764	65.6117	5.21327	34.8416	3.05402	29.7535	3.25839			581.187	30.1834	2.51103	34.5287	4.84863	22.124	1.37651	19.673	1.84467			581.187	23.0661	2.79278	25.3053	3.55411	22.4223	1.69563	25.626	2.12468
	582.571	57.4934	2.65486	64.9446	5.03417	34.9259	3.21478	29.9545	3.09905			582.571	30.1825	2.52517	33.8028	4.53025	21.999	1.36551	19.692	1.94805			582.571	23.2732	2.68839	25.2885	3.51086	22.4318	1.75488	25.6296	2.19802
	583.955	58.0018	2.59515	64.2291	5.1461	35.0239	3.2479	30.1792	3.21941			583.955	30.1756	2.42915	33.6983	4.33788	21.8614	1.37483	19.6149	1.98414			583.955	23.2872	2.61922	25.0372	3.37789	22.5372	1.7665	25.5549	2.1284
	585.339	58.2141	2.849	64.6486	4.89955	34.7425	3.11557	29.9737	3.32461			585.339	30.2259	2.33332	33.6759	4.21512	21.667	1.35736	19.3269	1.90604			585.339	23.2751	2.65529	25.1005	3.33787	22.7052	1.77934	25.4164	2.15058
	586.722	57.2634	2.74669	64.927	4.84745	34.6944	3.05033	29.8179	3.2558			586.722	29.9606	2.31234	33.2625	4.09366	21.6759	1.3591	19.2604	1.95048			586.722	22.8421	2.45019	25.1135	3.42664	22.7881	1.80604	25.0735	2.22997
	588.106	56.5905	2.58681	64.617	4.77625	34.5973	3.06593	29.4742	3.25004			588.106	29.6176	2.304	33.189	4.00151	21.5905	1.40132	19.1498	1.93335			588.106	22.6808	2.3997	25.1674	3.47291	22.4023	1.7954	24.7146	2.22423
	589.49	56.7631	2.69755	64.1928	4.41094	34.5198	3.14344	29.5883	3.25464			589.49	29.6046	2.31093	33.0469	4.04865	21.5359	1.35142	19.136	1.86886			589.49	22.32	2.37355	25.0662	3.50956	22.2997	1.66288	24.6903	2.12482
	590.874	57.1364	2.9373	63.2293	4.48937	34.5707	3.23527	29.5976	3.24083			590.874	29.6008	2.30475	32.6409	3.90647	21.4662	1.35551	19.12	1.94482			590.874	21.893	2.33407	24.9034	3.41689	22.3411	1.60253	25.1619	2.23183
	592.258	57.5457	2.83555	62.3787	4.54112	34.0658	3.16055	29.7434	3.16854			592.258	29.5644	2.29278	32.3704	3.79946	21.312	1.34906	19.0754	1.96301			592.258	21.9522	2.47318	24.6049	3.30201	22.0178	1.47507	25.2322	2.274
	593.641	57.077	3.02367	62.2963	4.31078	34.0336	3.07896	29.4294	3.22477			593.641	29.338	2.24603	32.0958	3.90811	21.0751	1.3291	19.0213	1.89441			593.641	22.107	2.70954	24.5658	3.34318	21.8042	1.40864	25.1497	2.2389
	595.025	57.0782	3.14762	61.3455	4.1883	33.9089	3.09982	29.4089	3.20961			595.025	29.0288	2.27855	31.7193	3.93975	20.958	1.27808	19.0857	1.96408			595.025	22.1864	2.76361	24.3148	3.39382	21.7205	1.4673	25.3244	2.47403
	596.409	56.6468	2.86692	60.7162	4.63679	33.6477	2.97501	29.4605	3.32285			596.409	29.0307	2.32383	31.4578	3.91408	21.0752	1.24322	18.7951	1.90846			596.409	22.1739	2.78118	24.1105	3.52316	21.8436	1.55284	25.3346	2.70275
	597.793	56.0163	3.13828	60.307	4.52368	33.6095	2.97726	29.1233	3.27677			597.793	29.0719	2.33262	31.3473	3.8861	21.0138	1.31283	18.5223	1.78543			597.793	22.2806	2.8178	23.8777	3.49186	21.7105	1.55083	24.6816	2.74218
	599.176	56.1621	3.23939	60.0051	4.18639	33.4893	3.06491	28.9319	3.10859			599.176	29.0817	2.34004	31.0957	3.77447	20.8764	1.34663	18.3461	1.76884			599.176	22.3655	2.80294	23.4452	3.47739	21.6587	1.56025	24.218	2.71162
	600.56	56.029	3.12795	59.5826	4.15605	33.4813	3.04348	28.8948	3.0625			600.56	29.0586	2.32624	30.7773	3.73655	20.7882	1.29002	18.3218	1.79694			600.56	22.5093	2.87757	23.3519	3.4758	21.5098	1.56995	24.0295	2.71449
	601.944	55.2446	3.16195	59.5479	4.34733	33.2668	2.94881	28.7242	3.23325			601.944	28.7432	2.26304	30.6192	3.70449	20.7037	1.24872	18.3056	1.85353			601.944	22.0415	2.81437	23.2773	3.34671	21.2715	1.5633	24.1288	2.82559
	603.328	54.3821	2.97955	60.0697	4.47339	32.923	2.9398	28.8938	3.20208			603.328	28.4381	2.22677	30.3295	3.59364	20.6079	1.25461	18.2064	1.78786			603.328	21.5094	2.70492	23.3664	3.30484	21.0238	1.50154	23.8917	2.86137
	604.712	53.802	3.08852	59.8292	4.39663	32.9894	2.93576	28.8122	3.06961			604.712	28.1858	2.15777	30.2603	3.57415	20.6133	1.27223	18.233	1.83839			604.712	21.3063	2.6497	23.6637	3.42225	21.005	1.60896	23.1143	2.76505
	606.095	54.3269	3.25615	58.9707	4.10305	32.8151	2.95478	28.59	3.24524			606.095	28.123	2.24431	30.1711	3.56382	20.5347	1.26858	18.0902	1.90066			606.095	21.6114	2.64758	23.774	3.48569	20.653	1.65225	22.6653	2.56467
	607.479	54.387	3.14557	58.4422	3.99366	32.9026	2.94436	28.2077	3.1785			607.479	27.8566	2.26951	29.8079	3.48505	20.5138	1.26079	17.8707	1.8691			607.479	21.4953	2.56048	23.6662	3.43827	20.5265	1.64313	22.5198	2.48313
	608.863	54.0744	3.12753	58.0858	3.89037	32.6458	2.88674	27.9251	3.10487			608.863	27.5945	2.16034	29.6484	3.47855	20.4212	1.28873	17.6534	1.90582			608.863	21.478	2.4982	23.5179	3.43649	20.6718	1.62057	22.5209	2.63326
	610.247	53.8236	2.79157	57.9971	3.98909	32.3513	2.94084	28.0482	3.2194			610.247	27.4339	2.18554	29.4819	3.52541	20.2352	1.2905	17.5356	1.8793			610.247	21.5281	2.56876	23.244	3.37616	20.4919	1.50079	22.2431	2.77902
	611.63	53.3408	2.85309	57.5904	3.98298	32.3979	2.86933	28.2393	3.25418			611.63	27.1499	2.21183	29.3186	3.47909	20.3291	1.23904	17.3066	1.80169			611.63	21.1429	2.56805	23.2393	3.38187	19.9757	1.37469	21.8211	2.6965
	613.014	53.5556	2.84102	57.1308	3.61269	32.5398	2.81259	28.1263	3.14639			613.014	27.2315	2.18919	29.1404	3.39258	20.3019	1.1851	17.1645	1.72548			613.014	20.8742	2.63396	23.4931	3.47836	19.6818	1.35664	21.6323	2.58359
	614.398	53.2851	2.8986	57.1379	3.65181	32.8558	2.81566	27.7898	3.18856			614.398	27.3347	2.28106	28.8837	3.34824	20.0852	1.13984	17.129	1.74869			614.398	21.0226	2.58124	22.9249	3.48349	19.5769	1.33851	21.5732	2.53515
	615.782	53.3464	2.92331	57.2011	3.97203	32.7203	2.88268	28.1199	3.12966			615.782	27.215	2.31496	28.5941	3.19938	20.0197	1.13734	16.8747	1.76016			615.782	20.9158	2.55	22.5215	3.51031	19.3714	1.34185	21.6024	2.62149
	617.166	53.6176	2.77448	56.79	3.79759	32.3517	2.91686	28.0547	3.26005			617.166	27.363	2.40474	28.3912	3.10351	19.91	1.14888	16.8147	1.70336			617.166	21.1376	2.66527	22.5348	3.38246	19.4104	1.39839	21.3387	2.5356
	618.549	53.4114	2.9084	56.8313	3.67747	32.266	2.80261	27.6854	3.27406			618.549	27.4224	2.45143	28.3485	3.10973	19.8341	1.13875	16.7172	1.69116			618.549	21.3599	2.66362	22.7087	3.39213	19.3777	1.41509	20.6934	2.39181
	619.933	53.3937	3.0849	56.6446	3.84212	32.5319	2.78536	27.4852	3.21503			619.933	27.2637	2.43489	28.2676	3.10423	19.7987	1.12103	16.3184	1.65683			619.933	21.7316	2.64831	22.3404	3.35916	19.2183	1.34524	20.4358	2.47076
	621.317	53.5995	3.22813	55.4899	3.83701	32.3835	2.79467	27.7471	3.26165			621.317	27.0434	2.41353	27.7015	3.00719	19.5979	1.12548	16.2526	1.62488			621.317	21.8109	2.52706	21.627	3.12077	19.2093	1.27596	20.3567	2.49354
	622.701	53.8796	2.91101	55.3178	3.67604	31.9048	2.72685	27.8039	3.21153			622.701	27.0948	2.44146	27.6711	3.07959	19.3881	1.11177	16.1934	1.59145			622.701	21.5979	2.5251	21.3599	3.08163	19.0318	1.1496	20.1188	2.50894
	624.084	53.5401	2.92692	55.6389	3.53764	31.6861	2.67605	27.7676	3.2404			624.084	27.1424	2.43365	27.6809	3.08985	19.3367	1.14984	16.1825	1.63275			624.084	21.6064	2.66984	21.0725	3.19452	18.9777	1.13727	20.0331	2.57791
	625.468	53.6342	2.87619	55.0426	3.46484	31.7681	2.83834	27.5915	3.23955			625.468	26.8712	2.30348	27.1833	3.00914	19.333	1.19699	16.0611	1.71746			625.468	21.8388	2.7273	21.0317	3.26278	18.9503	1.2133	19.8868	2.62597
	626.852	53.6792	2.96358	54.7591	3.36749	31.5065	2.84713	27.4388	3.34675			626.852	26.8599	2.25734	26.7818	2.9255	19.0803	1.14337	15.8567	1.66874			626.852	21.6552	2.62157	20.8414	3.15101	19.015	1.18768	19.3862	2.56615
	628.236	53.8025	3.19413	55.5201	3.34582	31.3307	2.73673	27.6758	3.23003			628.236	26.8582	2.27306	27.0636	2.90935	18.8298	1.10716	15.7237	1.52446			628.236	21.1825	2.611	20.8613	3.15998	18.9246	1.21914	19.0804	2.52871
	629.62	53.415	3.01138	55.5272	3.49582	31.4291	2.66875	27.3416	3.26743			629.62	26.6933	2.28051	27.025	3.02778	18.6911	1.10362	15.442	1.49452			629.62	21.0395	2.58855	20.7335	3.21782	18.8996	1.27962	19.0921	2.60925
	631.003	52.7722	2.72013	54.58	3.44327	31.0476	2.68521	26.9028	3.26957			631.003	26.4647	2.35856	26.5792	3.09513	18.4641	1.09031	15.1813	1.50293			631.003	20.9477	2.59626	20.5444	3.26326	18.7944	1.31287	18.793	2.68561
	632.387	52.765	2.5854	54.3063	3.2681	30.7404	2.66937	27.0356	3.23			632.387	26.2734	2.27623	26.3086	3.11662	18.2753	1.06154	15.0988	1.47347			632.387	20.8839	2.68738	20.3555	3.21479	18.654	1.3193	18.1866	2.67234
	633.771	52.4896	2.71968	54.6002	3.29255	30.8914	2.78111	27.3135	3.23834			633.771	26.1298	2.24855	26.1327	3.10688	18.2028	0.993746	14.8974	1.52676			633.771	20.6177	2.78453	20.3072	3.25371	18.3564	1.33122	18.0032	2.65117
	635.155	51.6589	2.67568	54.2175	3.28307	30.95	2.75498	27.3807	3.30135			635.155	25.8877	2.21702	25.8273	3.05739	18.0306	1.04167	14.7308	1.52171			635.155	20.6764	2.91364	20.183	3.29847	17.9206	1.41011	18.0303	2.68601
	636.538	51.1793	2.82008	54.0548	3.21011	30.9156	2.63886	27.282	3.30855			636.538	25.8394	2.18259	25.6721	3.11349	17.963	1.05171	14.5201	1.40574			636.538	20.5697	2.89183	19.7432	3.2486	17.4305	1.24873	17.6839	2.7205
	637.922	50.8989	2.64784	54.2628	3.28793	31.0463	2.67825	27.0576	3.30268			637.922	25.7757	2.19472	25.8138	3.29847	17.8654	1.01606	14.4478	1.32938			637.922	20.3501	2.88429	19.5597	3.2635	17.1665	1.08717	17.2255	2.58471
	639.306	51.3992	2.70631	53.8632	3.22266	30.7656	2.70495	27.1146	3.30683			639.306	25.4558	2.14841	25.6052	3.33033	17.6414	1.00821	14.4014	1.33259			639.306	20.3942	2.8533	19.4254	3.31315	17.1282	1.06231	16.6023	2.3624
	640.69	51.3104	2.74192	53.9056	3.20155	30.7306	2.62504	27.0739	3.35548			640.69	25.2978	2.20122	25.4228	3.23061	17.5961	0.987547	14.1385	1.24467			640.69	20.4253	2.8426	19.1981	3.3621	16.9709	1.01929	16.3502	2.40192
	642.074	50.5181	2.56742	54.0262	3.32852	30.8739	2.48789	27.1545	3.43142			642.074	25.1357	2.19592	25.1348	3.31173	17.5169	0.96155	13.9223	1.25829			642.074	20.3061	2.84314	19.1576	3.33265	16.8551	0.968839	16.1448	2.39421
	643.457	50.705	2.5408	53.7985	3.72245	30.9659	2.5241	27.1929	3.45312			643.457	24.985	2.20214	24.9077	3.59259	17.3524	0.960454	13.9131	1.33879			643.457	20.2944	2.8806	19.0481	3.30898	16.644	0.972317	15.9213	2.44042
	644.841	50.9347	2.52151	54.153	3.96941	30.9521	2.70686	26.9321	3.49591			644.841	25.1183	2.27303	24.9531	3.7846	17.1938	1.01151	13.7451	1.36975			644.841	20.0209	2.78714	18.933	3.33407	16.5073	0.962173	15.6512	2.53297
	646.225	51.1759	2.61399	53.9857	3.76381	30.7853	2.72815	27.0259	3.53388			646.225	25.0072	2.29056	24.8323	3.7596	17.1271	1.04627	13.5909	1.34051			646.225	19.7432	2.69246	19.0607	3.39705	16.5642	1.07973	15.3709	2.47507
	647.609	51.055	2.66166	53.7009	3.84594	30.4722	2.69224	27.0982	3.45559			647.609	24.832	2.31841	24.6299	3.82173	17.0808	1.03327	13.4743	1.28108			647.609	19.5791	2.79191	19.2356	3.62765	16.7569	1.29934	15.2109	2.46062
	648.992	50.66	2.67752	53.7738	3.95603	30.6922	2.72618	27.1004	3.35407			648.992	24.7094	2.28264	24.5754	3.92059	16.9349	1.02303	13.2943	1.30444			648.992	19.2171	2.8322	18.5351	3.54205	16.685	1.30812	15.0456	2.5163
	650.376	50.4023	2.59698	53.353	4.03148	30.4938	2.60551	27.1058	3.38641			650.376	24.3026	2.20116	24.41	3.93587	16.731	0.953185	13.1451	1.37393			650.376	18.9466	2.91702	18.0604	3.36399	16.2441	1.19447	14.794	2.55497
	651.76	50.3693	2.35665	53.8307	3.97902	30.3263	2.58456	27.0744	3.40129			651.76	23.8332	2.20842	24.0109	3.95447	16.397	0.926367	13.0467	1.37325			651.76	18.7885	2.91761	17.8626	3.28156	15.7551	1.07308	14.5291	2.42874
	653.144	50.0532	2.50604	54.0157	3.85626	30.3295	2.62082	27.2042	3.37811			653.144	23.7	2.22536	23.6312	3.88917	16.2579	0.970949	12.7345	1.31295			653.144	18.7049	2.88037	17.6558	3.34227	15.3291	1.06244	14.3025	2.44491
	654.528	49.4874	2.50913	53.2274	3.92429	30.439	2.54654	27.0888	3.45439			654.528	23.6202	2.238	23.4763	3.76182	16.1388	0.971171	12.5692	1.32971			654.528	18.8554	2.86801	17.3655	3.31675	15.0723	1.01413	13.9953	2.39678
	655.911	49.4203	2.50437	52.4114	3.94864	30.6581	2.59693	27.2533	3.43737			655.911	23.6073	2.30487	23.0701	3.63	16.0441	0.924908	12.4255	1.33301			655.911	19.1376	2.81076	17.2362	3.33989	14.7346	0.949733	13.7673	2.35205
	657.295	49.8317	2.66575	52.7582	3.71791	30.4175	2.70642	26.9573	3.37527			657.295	23.4083	2.39527	22.7365	3.575	15.8607	0.907137	12.431	1.38919			657.295	19.2099	2.83328	17.082	3.38119	14.6217	0.969501	13.5205	2.38319
	658.679	50.0925	2.64641	52.9243	3.80559	30.3957	2.76729	26.8321	3.36671			658.679	23.3045	2.40119	22.5	3.60574	15.7779	0.91645	12.2951	1.40476			658.679	19.0351	2.85593	16.9719	3.40927	14.4821	0.995252	13.0093	2.30651
	660.063	49.924	2.58698	52.8654	3.88819	30.6102	2.73894	27.0098	3.41899			660.063	23.2478	2.3791	22.2941	3.624	15.7876	0.937566	12.1321	1.35587			660.063	18.78	2.81696	17.1958	3.47099	14.1831	0.961353	12.7255	2.24261
	661.447	49.9018	2.44182	52.8811	3.88787	30.764	2.70989	26.9582	3.5414			661.447	22.8202	2.37423	22.032	3.63434	15.7722	0.931671	11.9856	1.34068			661.447	18.4638	2.7595	17.0536	3.51768	13.9616	0.944949	12.6525	2.2533
	662.83	49.5176	2.56448	52.2563	3.92955	30.5082	2.73311	26.8865	3.49347			662.83	22.7628	2.38545	21.8083	3.6215	15.6348	0.933534	11.8651	1.31995			662.83	18.1121	2.79191	16.631	3.50488	13.9574	0.944001	12.4732	2.19726
	664.214	49.6346	2.62591	52.0948	3.99822	30.0109	2.64345	26.7908	3.35468			664.214	22.7253	2.37014	21.5597	3.55598	15.4449	0.939957	11.6817	1.27981			664.214	17.9619	2.92303	16.4375	3.47916	13.7791	0.901737	12.2432	2.07982
	665.598	49.9289	2.56476	52.264	4.06933	30.0487	2.62814	26.9165	3.53087			665.598	22.6903	2.40168	21.4615	3.56887	15.269	0.956732	11.5525	1.27354			665.598	17.8147	2.92303	16.2932	3.50181	13.6606	0.956114	11.9308	1.97449
	666.982	49.3704	2.62623	52.2707	3.97911	30.4949	2.79761	27.0877	3.65199			666.982	22.6123	2.43987	21.3504	3.68648	15.1479	0.937793	11.3994	1.23455			666.982	17.3592	2.90192	15.9086	3.37703	13.4819	1.08546	11.7134	1.90805
	668.365	48.4707	2.60762	52.7764	3.98179	30.2362	2.79001	27.1585	3.58265			668.365	22.4302	2.45469	21.422	3.796	15.0844	0.895074	11.3103	1.1686			668.365	17.429	2.94423	15.7163	3.39771	13.249	1.14457	11.3793	1.85722
	669.749	48.949	2.77594	53.3982	4.12958	30.3028	2.67782	27.0542	3.45761			669.749	22.3341	2.46159	21.1549	3.83839	14.8338	0.892251	11.2989	1.20518			669.749	17.3414	2.95566	15.6105	3.50826	13.3386	1.24096	11.1174	1.84531
	671.133	49.3567	2.79835	53.4887	4.09477	30.665	2.72309	27.2205	3.4417			671.133	22.229	2.47216	20.8983	3.87493	14.7629	0.922539	11.1628	1.18544			671.133	17.226	2.82398	15.5438	3.48178	13.3076	1.24038	10.8086	1.81184
	672.517	49.2843	2.66822	52.5373	4.05632	30.5608	2.65157	27.119	3.4333			672.517	21.9585	2.42065	20.7853	3.89902	14.5701	0.939003	11.052	1.19946			672.517	17.0804	2.75808	15.4149	3.41757	13.1656	1.2382	10.3824	1.67846
	673.901	49.4515	2.59846	52.9503	4.21779	30.0312	2.61382	27.0755	3.42731			673.901	21.6702	2.32733	20.7063	3.95128	14.305	0.903976	11.0223	1.24833			673.901	16.7285	2.77504	15.3868	3.44514	13.0134	1.31454	10.2144	1.6076
	675.284	48.8826	2.49059	53.869	4.34807	29.9572	2.69187	27.1287	3.41136			675.284	21.4628	2.31573	20.6514	4.05236	14.1565	0.8721	11.0643	1.23499			675.284	16.3432	2.75376	15.3568	3.55486	12.8826	1.32437	10.1521	1.64284
	676.668	49.1083	2.54484	53.2613	4.35492	30.0858	2.67034	26.9965	3.47187			676.668	21.5415	2.31163	20.5961	4.15054	14.065	0.808273	10.8142	1.10947			676.668	16.2838	2.90369	15.4193	3.63183	12.8069	1.26056	10.2341	1.71748
	678.052	48.919	2.47036	53.1942	4.39157	30.0068	2.8046	27.05	3.60136			678.052	21.5002	2.22996	20.4799	4.14272	13.7428	0.85492	10.7751	1.06391			678.052	16.5166	3.04057	15.4916	3.63183	12.6402	1.28999	10.3492	1.75007
	679.436	48.8447	2.643	53.364	4.37739	30.1349	2.77027	27.0687	3.50346			679.436	21.0845	2.16792	20.101	4.03774	13.6858	0.889997	10.8553	1.13273			679.436	16.5829	3.03731	15.4565	3.59458	12.1886	1.26461	10.2532	1.8204
	680.819	49.2666	2.8291	53.3016	4.61684	30.2125	2.63287	27.2028	3.48466			680.819	20.9797	2.20409	19.7609	3.90501	13.5773	0.920761	10.7269	1.12123			680.819	16.4943	3.09392	14.9982	3.42791	11.9234	1.15371	10.2297	1.83639
	682.203	48.9193	2.67227	52.8338	4.72076	30.2845	2.67004	27.3983	3.54189			682.203	20.966	2.28741	19.3762	3.74416	13.3185	0.904872	10.6785	1.13247			682.203	16.3188	3.1053	14.6902	3.28886	11.7659	1.16648	10.1529	1.76387
	683.587	48.5851	2.58157	52.5426	4.79343	30.4634	2.76727	27.0204	3.44219			683.587	20.6912	2.21618	19.2891	3.80241	13.2249	0.89312	10.6618	1.15682			683.587	16.2297	3.19059	14.7218	3.32052	11.7958	1.22036	9.50911	1.59762
	684.971	48.7663	2.53224	53.0016	4.85794	30.2312	2.72	26.5908	3.46042			684.971	20.5354	2.08258	19.5366	3.98144	13.1208	0.905394	10.4774	1.09671			684.971	16.3392	3.30424	14.5885	3.23204	11.8072	1.21699	8.96957	1.44797
	686.355	48.6986	2.61074	53.3441	4.76043	30.0651	2.7098	26.75	3.44772			686.355	20.3405	2.05591	19.4268	4.11656	13.0375	0.936584	10.2223	1.0556			686.355	16.1095	3.18363	14.3974	3.18523	11.5194	1.3197	8.95157	1.41819
	687.738	47.8818	2.66194	52.846	4.78402	30.126	2.75508	26.8483	3.37773			687.738	20.2585	2.08394	19.0132	4.04266	12.9131	0.902657	10.2535	1.06091			687.738	15.557	2.99679	14.0651	3.18545	11.3107	1.50868	8.70805	1.38517
	689.122	48.2305	2.57872	52.1924	4.95215	30.3159	2.71828	27.0653	3.33488			689.122	19.9261	2.03306	18.8135	3.93871	12.7085	0.925544	10.2025	1.08525			689.122	15.2416	2.90193	13.7534	3.11102	11.3768	1.53481	8.49749	1.36652
	690.506	48.282	2.73505	51.9192	5.09635	29.9849	2.69747	27.1303	3.36761			690.506	19.5369	2.05662	18.6376	3.88932	12.6379	0.931305	10.087	1.05751			690.506	15.0113	2.90735	13.7465	3.07056	11.1905	1.477	8.4768	1.36153
	691.89	47.6764	2.69657	52.0919	5.11823	29.6392	2.70809	27.1556	3.34337			691.89	19.316	2.04277	18.6934	3.92111	12.5035	0.881416	9.96708	0.991817			691.89	14.6912	2.86949	13.729	3.14957	10.7885	1.40406	8.53468	1.37631
	693.273	47.5101	2.61947	52.2948	5.16138	29.8504	2.67409	27.2014	3.37168			693.273	19.1862	2.01372	18.5563	3.8639	12.3307	0.89886	9.8395	0.95786			693.273	14.404	2.87618	13.2008	3.02428	10.2972	1.33923	8.54483	1.41785
	694.657	47.2719	2.69076	52.0717	4.98262	29.8912	2.67466	27.3543	3.34733			694.657	18.8855	1.95371	18.2334	3.8472	12.3067	0.884621	9.7755	0.928786			694.657	14.2409	2.85009	13.0219	2.96433	10.1814	1.32615	8.32693	1.35211
	696.041	46.9643	2.55388	51.8686	4.94692	29.9631	2.73441	27.0575	3.35297			696.041	18.5335	1.93956	18.07	3.85533	12.2349	0.851656	9.76771	0.961822			696.041	14.0334	2.80016	13.041	3.07528	10.1646	1.31249	8.0818	1.33818
	697.425	47.0586	2.55314	51.9196	5.09558	30.1452	2.75332	26.9863	3.28474			697.425	18.4328	1.93213	18.047	3.86195	12.029	0.899003	9.56224	0.931404			697.425	13.8116	2.79166	13.1659	3.27723	9.99398	1.31232	7.91586	1.30506
	698.809	47.0473	2.42979	51.8007	4.97506	30.0779	2.79456	27.2648	3.39394			698.809	18.0551	1.91543	17.8936	3.82332	11.9174	0.895061	9.57518	0.947901			698.809	13.6218	2.7159	13.0701	3.27231	9.88271	1.29407	7.83061	1.30647
	700.192	47.4081	2.47744	50.8893	5.16683	29.8899	2.83772	27.2449	3.51073			700.192	17.948	1.98172	17.5664	3.75324	11.8902	0.88114	9.65719	0.996023			700.192	13.4797	2.66576	12.9101	3.20097	9.83466	1.31083	7.84627	1.32598
	701.576	47.1792	2.69939	50.6033	5.04989	30.2255	2.78265	26.8235	3.44448			701.576	17.8326	1.97267	17.3344	3.68972	11.7986	0.863611	9.54128	0.95081			701.576	13.4434	2.77777	12.5184	3.08832	9.85656	1.34312	7.89315	1.3116
	702.96	47.2225	2.7189	50.8081	5.02915	30.4265	2.71528	26.843	3.4411			702.96	17.5323	1.93966	17.338	3.68468	11.6955	0.841922	9.37898	0.90211			702.96	13.1717	2.71036	12.3197	3.04058	9.73002	1.30576	7.80519	1.28509
	704.344	47.4769	2.76475	51.1346	5.26723	30.0492	2.70904	26.9226	3.40571			704.344	17.2859	1.99701	17.1493	3.6156	11.5197	0.833306	9.24471	0.903499			704.344	12.769	2.58956	12.3829	3.0391	9.39874	1.21244	7.66534	1.22919
	705.727	47.1759	2.63943	50.726	5.23392	29.9442	2.65947	26.9893	3.41979			705.727	17.0331	2.00247	17.1235	3.61227	11.5148	0.807378	9.23899	0.916893			705.727	12.6429	2.61731	12.2631	3.07149	9.28276	1.22632	7.42454	1.15251
	707.111	46.6984	2.55891	50.7454	5.20275	30.1784	2.63588	27.1226	3.49217			707.111	16.7215	1.97379	17.1583	3.64121	11.3482	0.807851	9.23728	0.882548			707.111	12.5914	2.67176	12.0216	3.00303	9.15461	1.26449	7.25706	1.11204
	708.495	46.879	2.5747	51.4239	5.64348	30.2215	2.69456	27.0861	3.39086			708.495	16.673	1.9271	17.2616	3.61784	11.2669	0.819862	9.12325	0.889634			708.495	12.5363	2.70172	11.9159	2.98564	8.91152	1.27286	7.2572	1.11781
	709.879	46.9969	2.57204	50.6452	5.46668	30.0553	2.71279	26.907	3.34391			709.879	16.4824	1.91596	17.2816	3.68765	11.3241	0.85176	9.24852	0.871206			709.879	12.3082	2.61982	11.5489	2.81745	8.81055	1.35105	7.30894	1.10187
	711.263	46.8523	2.6771	50.4766	5.31068	29.8272	2.75381	27.0678	3.34667			711.263	16.3031	1.88341	17.1803	3.72445	11.2315	0.816199	9.26669	0.828625			711.263	12.2431	2.64374	11.5739	2.89533	8.8814	1.35277	7.27035	1.07549
	712.646	46.8849	2.80224	51.142	5.67332	30.0034	2.8232	27.4845	3.54877			712.646	16.1066	1.88167	16.9397	3.71159	11.0135	0.824448	9.24904	0.870029			712.646	12.0113	2.67388	11.745	3.10551	8.80674	1.31228	7.24009	1.1135
	714.03	46.3693	2.64427	51.231	5.67089	29.8492	2.86471	27.794	3.59926			714.03	15.8815	1.8558	16.7744	3.59186	10.9321	0.831085	9.30107	0.861425			714.03	11.7559	2.57821	11.6943	3.09298	8.66446	1.3144	7.18041	1.13884
	715.414	46.5907	2.7286	50.042	5.55329	29.7588	2.81419	27.3574	3.71017			715.414	15.5988	1.77814	16.6834	3.54835	10.9108	0.761546	9.31849	0.821122			715.414	11.7853	2.52754	11.5638	2.97108	8.51808	1.31303	7.16527	1.0797
	716.798	46.5176	2.67668	50.1955	5.95471	29.5839	2.73796	27.5494	3.67681			716.798	15.3545	1.72203	16.6107	3.63842	10.7296	0.759608	9.37346	0.832198			716.798	11.5998	2.54647	11.5651	2.95243	8.57201	1.33825	7.40925	1.14465
	718.181	46.0071	2.6148	50.6232	5.98054	29.7146	2.77514	27.2747	3.73238			718.181	15.1352	1.77053	16.4985	3.60562	10.6811	0.801399	9.35831	0.81202			718.181	11.4609	2.64641	11.4224	2.90535	8.39653	1.35806	7.53321	1.27404
	719.565	46.1116	2.83875	50.0971	5.51377	29.7297	2.73343	27.2647	3.73537			719.565	15.0545	1.74978	16.6135	3.56879	10.6011	0.775335	9.32152	0.786229			719.565	11.2319	2.6158	11.3798	2.89698	8.20562	1.35411	7.52622	1.2807
	720.949	46.4666	2.65024	50.1942	5.67425	29.7876	2.63551	27.5661	3.60351			720.949	14.9268	1.63599	16.5514	3.58226	10.6587	0.750936	9.35465	0.818996			720.949	11.0304	2.57649	11.2784	2.76885	8.10995	1.41694	7.51309	1.23617
	722.333	46.5244	2.55155	50.4136	5.7449	29.6966	2.80125	27.5045	3.66794			722.333	14.6314	1.55942	16.5313	3.60013	10.4583	0.717971	9.43923	0.836394			722.333	11.0636	2.54924	11.295	2.67193	7.99119	1.40337	7.4285	1.21657
	723.717	45.9056	2.75448	49.9353	5.42362	29.2798	2.75192	27.5306	3.78623			723.717	14.484	1.5722	16.6673	3.59641	10.2572	0.744438	9.52931	0.830782			723.717	11.1934	2.58941	11.2585	2.63282	7.84891	1.35631	7.45856	1.18967
	725.1	46.6523	2.81614	49.9139	5.64742	29.3868	2.72714	27.6542	3.70134			725.1	14.4196	1.51947	16.6781	3.62915	10.2234	0.694324	9.6843	0.847323			725.1	11.0504	2.57895	11.0504	2.64333	7.92695	1.37695	7.54226	1.19956
	726.484	46.4671	2.87228	50.3169	5.91549	29.6521	2.70056	27.267	3.81903			726.484	14.2002	1.50135	16.556	3.58429	10.2444	0.659913	9.69437	0.802225			726.484	10.5894	2.48884	10.9043	2.64285	7.81658	1.43691	7.71907	1.30296
	727.868	46.0633	2.65308	50.6268	5.85897	29.552	2.6748	27.2014	3.90932			727.868	14.134	1.50368	16.404	3.44138	10.1448	0.687784	9.71898	0.861173			727.868	10.4387	2.5139	10.92	2.77191	7.67783	1.45809	7.7561	1.29031
	729.252	46.2016	2.60924	50.0191	5.7401	29.2031	2.80061	27.6407	3.9136			729.252	14.0428	1.50545	16.1792	3.3881	10.0548	0.626207	10.0523	0.979796			729.252	10.4369	2.51431	10.8207	2.75606	7.68416	1.47449	7.57533	1.28688
	730.635	46.1304	2.83466	50.1983	5.60334	28.9199	2.76191	27.7661	3.85334			730.635	13.9553	1.49467	16.0698	3.41301	10.0682	0.594601	10.1717	0.994901			730.635	10.2641	2.50573	10.5228	2.63248	7.6308	1.48282	7.88457	1.35218
	732.019	46.8098	2.8116	50.5631	5.74136	29.061	2.62358	27.4654	3.75798			732.019	13.7184	1.51114	16.2541	3.4222	10.1054	0.553555	10.1567	0.994959			732.019	10.1093	2.49192	10.4674	2.66313	7.6142	1.46347	8.03638	1.42113
	733.403	46.3632	2.73313	51.333	6.15763	29.3148	2.51804	27.5531	3.78327			733.403	13.6007	1.50946	16.3198	3.40194	10.0123	0.561466	10.2384	1.00941			733.403	10.1362	2.54213	10.5724	2.72823	7.58979	1.47971	8.13059	1.48146
	734.787	46.377	2.84128	50.6506	5.63515	29.7798	2.60622	27.8652	3.81491			734.787	13.5798	1.50297	16.3492	3.35238	10.0683	0.5659	10.3774	1.0378			734.787	10.0694	2.48881	10.5245	2.72784	7.64152	1.49213	8.38492	1.60317
	736.171	46.8942	3.03156	50.2412	5.10105	29.7516	2.74907	27.481	4.00488			736.171	13.5385	1.52314	16.3382	3.31265	10.1223	0.557562	10.5128	1.06423			736.171	9.88258	2.46903	10.3764	2.64266	7.59362	1.46791	8.65409	1.65727
	737.554	46.6827	3.09373	50.5379	5.60941	29.9619	2.7235	27.4966	3.93321			737.554	13.2573	1.49939	16.2312	3.24928	10.127	0.494015	10.6254	1.11792			737.554	9.61301	2.3774	10.4449	2.59127	7.64037	1.38137	8.72839	1.68474
	738.938	46.6498	3.19377	50.619	5.71879	30.0459	2.67271	27.6274	3.87919			738.938	13.1477	1.46235	16.2797	3.23986	10.046	0.495798	10.7379	1.15524			738.938	9.33259	2.28316	10.4946	2.61048	7.66961	1.33794	8.84524	1.56453
	740.322	46.6058	3.03676	50.4424	5.37664	30.0704	2.54917	27.7876	3.98692			740.322	13.0757	1.48551	16.3516	3.23636	10.148	0.495909	10.9978	1.25736			740.322	9.3664	2.33526	10.3219	2.505	7.67888	1.33362	8.92203	1.54612
	741.706	46.0945	2.86592	50.4397	5.34179	30.1931	2.56746	28.0725	3.93373			741.706	13.0297	1.48241	16.3953	3.15592	10.2601	0.477877	11.1843	1.28611			741.706	9.35259	2.40739	10.3899	2.49826	7.49838	1.32596	9.46722	1.74584
	743.089	46.6883	2.90419	50.464	5.54632	30.2537	2.6937	27.9001	4.08227			743.089	12.8808	1.47893	16.4584	3.18131	10.2631	0.470771	11.4286	1.30121			743.089	9.13596	2.35944	10.5685	2.53547	7.40475	1.37069	9.91696	1.97379
	744.473	46.9237	2.74559	50.3086	5.42841	30.0619	2.62113	28.0849	4.12374			744.473	12.7363	1.45629	16.6286	3.34589	10.3072	0.48903	11.6642	1.35523			744.473	9.12655	2.39425	10.689	2.5338	7.42034	1.35089	9.9839	2.13281
	745.857	46.3967	2.73216	49.7841	5.22158	29.8573	2.65632	27.983	4.00855			745.857	12.6301	1.43752	16.5532	3.31294	10.2925	0.523164	11.8169	1.45394			745.857	9.04204	2.39701	10.7663	2.55237	7.5585	1.01652	10.2816	2.1281

## Sheet: Fig.2C
WFA	cMD		LRx			Agg	cMD		LRx			PV	cMD		LRx
	dep	non	dep	non			dep	non	dep	non			dep	non	dep	non
	79.0853	98.0709	41.006	53.9884			39.7706	37.3125	22.4544	21.6147			31.9643	29.3589	32.0684	31.5819
	90.6988	103.755	58.5936	43.3319			31.8546	37.2303	26.4101	29.9779			24.7525	23.8635	22.3876	25.2974
	80.0951	69.4248	51.7019	52.6249			29.3026	43.9983	31.2072	20.1951			19.1294	35.7375	33.5802	33.9906
	84.3425	109.85	38.8891	39.6414			33.9598	42.553	21.2583	16.9128			24.8672	24.8273	29.5297	31.6475
	95.0315	112.482	41.7804	39.6725			48.4928	77.1575	24.9444	27.0191			39.9319	43.4101	25.6701	33.6105
	77.9297	71.7762	35.9191	28.8374			60.6568	41.9959	27.0701	24.4833			35.83	45.8429	29.7705	31.727
	60.1905	72.9562	47.217	33.865			47.4969	49.9672	30.7662	29.3085			26.6803	25.5108	41.5253	26.0956
			36.9309	46.0303					23.3582	35.3709					29.326	37.8994

## Sheet: Fig.2D
WFA	PV+				PV-					Agg	PV+				PV-
	cMD		LRx		cMD		LRx				cMD		LRx		cMD		LRx
	dep	non	dep	non	dep	non	dep	non			dep	non	dep	non	dep	non	dep	non
mean	134.766	146.017	75.8061	80.8434	85.4581	92.4492	59.4162	61.7508		mean	64.4794	63.5113	39.8822	38.2327	41.6969	42.7174	32.1356	30.3311
sem	5.01311	5.22448	2.87483	3.0248	2.31597	1.83915	1.6608	1.20444		sem	2.94376	2.77334	0.888236	1.3078	1.16779	1.06189	0.480186	0.542272
