# Supplementary material for: Homeostatic regulation of perisynaptic matrix metalloproteinase 9 (MMP9) activity in the amblyopic visual cortex
Source: eLife. 2019 Dec 23;8:e52503. doi: 10.7554/eLife.52503 (PMC6961978; doi:10.7554/eLife.52503)
Supplement: Figure 3—source data 1. [file elife-52503-fig3-data1.xlsx]

## Sheet: Fig.3A
size	dep	non		density	dep	non		intensity	dep	non
	0.732	0.505053			42.8564	20.3568			76.5605	48.5622
	1.0252	1.1214			34.6423	14.9997			26.3107	18.6255
	0.648323	0.771419			68.0346	22.1425			61.0828	21.8398
	0.51396	0.866034			35.7137	51.7848			66.9934	41.922
	1.14661	0.9325			42.4993	8.57128			37.1255	37.9041
	1.20806	0.527051			51.4277	13.9283			61.8377	35.8708

## Sheet: Fig.3B
dep		non
ori	shftd	ori	shftd
53.5433	3.14961	30	1.66667
66.3043	0	23.6842	2.63158
45.6693	0	46.2963	0
69	24	34.7826	15.2174
56.4885	14.5038	48.1481	22.2222
55.6452	6.45161	17.2414	0

## Sheet: Fig.3C
PV+		PV-
dep	non	dep	non
50.2943	9.11404	24.9658	3.34847
18.8252	2.2831	20.1828	1.1637
27.8971	12.078	36.2263	11.3106
16.2583	10.45	21.5382	22.1143
