# Supplementary material for: Homeostatic regulation of perisynaptic matrix metalloproteinase 9 (MMP9) activity in the amblyopic visual cortex
Source: eLife. 2019 Dec 23;8:e52503. doi: 10.7554/eLife.52503 (PMC6961978; doi:10.7554/eLife.52503)
Supplement: Figure 4—source data 1. [file elife-52503-fig4-data1.xlsx]

## Sheet: Fig.4B
WFA	deth (um)	dep mean	dep sem	non mean	non sem		Agg	deth (um)	dep mean	dep sem	non mean	non sem		PV	deth (um)	dep mean	dep sem	non mean	non sem
	0	1.95319	0.63281	5.61277	2.25939			0	1.06647	0.5772	3.87859	2.16573			0	4.60925	3.55383	27.0339	12.202
	1.38378	2.07613	0.769959	6.39811	2.39027			1.38378	1.0818	0.576536	4.20637	2.38632			1.38378	5.45569	3.78301	29.7494	13.193
	2.76756	2.25659	0.860046	6.57513	2.20899			2.76756	1.13322	0.614186	4.46071	2.49218			2.76756	7.07482	4.50174	31.9304	13.9924
	4.15134	2.43528	1.00002	8.08353	2.55388			4.15134	1.23879	0.687783	4.88786	2.60369			4.15134	9.37173	5.45702	33.9165	15.0335
	5.53512	2.74136	1.18996	9.66712	3.11333			5.53512	1.34619	0.750994	5.40224	2.78305			5.53512	11.2515	5.82283	35.7827	15.8859
	6.9189	2.88837	1.18162	10.5428	3.08649			6.9189	1.40565	0.743714	6.03704	2.94709			6.9189	13.7284	5.89804	38.1941	16.7592
	8.30268	3.21842	1.23741	11.0945	3.1606			8.30268	1.69455	0.804415	6.59137	3.0723			8.30268	17.7993	6.5353	40.5568	18.2925
	9.68646	3.58139	1.16383	12.72	3.52887			9.68646	1.91996	0.95244	7.11811	3.32416			9.68646	22.0518	6.43845	40.6624	18.8986
	11.0702	4.13859	1.04432	13.8846	3.90542			11.0702	2.27345	1.06443	7.52057	3.58807			11.0702	27.9907	5.07996	38.7765	18.549
	12.454	4.78816	1.23403	14.8235	3.95637			12.454	2.56513	1.12436	8.02409	3.84755			12.454	33.7492	4.62596	37.8658	18.3864
	13.8378	5.23962	1.2578	16.7946	4.60182			13.8378	2.85442	1.21279	7.91131	3.78368			13.8378	37.8085	6.19689	36.9167	17.9019
	15.2216	6.15154	1.53265	17.8109	5.07345			15.2216	3.243	1.34307	8.10596	3.88758			15.2216	42.2083	7.92451	36.3527	17.6988
	16.6054	7.26831	1.84016	18.6507	5.35367			16.6054	3.89712	1.61548	8.83355	4.18298			16.6054	46.3515	8.81276	36.7232	17.5746
	17.9891	7.99784	1.9009	19.7594	5.82329			17.9891	4.41378	1.71949	9.60987	4.50938			17.9891	47.8318	9.36633	36.6627	17.1881
	19.3729	9.07068	1.75065	22.3994	6.85302			19.3729	4.7855	1.82009	10.1582	4.70706			19.3729	46.2365	9.54689	35.6083	16.6401
	20.7567	10.1036	1.80643	23.6064	7.18969			20.7567	5.31204	2.00166	10.4346	4.59928			20.7567	44.2826	9.77684	34.7012	16.2538
	22.1405	10.7172	1.71668	23.6173	7.42137			22.1405	5.73898	2.21603	11.2136	4.68015			22.1405	43.9789	9.18806	34.1284	15.8037
	23.5242	11.6785	1.45259	24.0009	7.68066			23.5242	6.10926	2.34503	11.8156	4.86433			23.5242	43.6325	7.64616	33.2025	15.0181
	24.908	12.5058	1.65803	25.7992	8.11592			24.908	6.84024	2.50781	12.1778	4.98493			24.908	41.0419	7.26255	31.451	14.193
	26.2918	13.2764	1.55742	26.8757	8.561			26.2918	7.58766	2.58948	12.6671	5.03446			26.2918	38.6388	7.44604	29.9805	13.2256
	27.6756	14.3762	1.5915	27.5879	9.08638			27.6756	7.98631	2.66094	13.3088	5.12645			27.6756	36.2015	7.21387	29.0037	12.6575
	29.0594	15.0424	1.78451	28.0932	9.29796			29.0594	8.26276	2.87523	13.4862	5.12715			29.0594	35.0491	7.18074	28.287	12.3826
	30.4431	16.0885	1.91074	27.8967	9.12803			30.4431	8.6249	3.01231	13.8751	5.313			30.4431	33.9396	7.01926	28.556	12.2209
	31.8269	16.8316	1.80639	28.7204	9.02305			31.8269	8.64156	3.19002	14.3245	5.54592			31.8269	31.1666	6.81448	28.9181	11.6162
	33.2107	17.3603	1.90421	28.6965	8.98099			33.2107	8.80781	3.45865	14.6383	5.48761			33.2107	28.741	6.95517	28.558	10.7435
	34.5945	17.9562	2.21518	28.3735	9.00165			34.5945	9.09024	3.66056	14.7568	5.20379			34.5945	26.894	6.51563	28.4673	10.6171
	35.9783	18.6856	2.21959	28.9778	9.11112			35.9783	9.2895	3.70493	14.8191	5.18372			35.9783	26.8517	5.48191	27.3323	10.2518
	37.362	18.6577	2.0041	29.5708	9.22046			37.362	9.49444	3.71699	14.6113	5.23386			37.362	27.1526	5.30989	26.237	9.60226
	38.7458	18.9991	1.90191	30.5506	9.47369			38.7458	9.82943	3.8401	14.8064	5.21353			38.7458	28.0659	5.80052	25.7655	9.29879
	40.1296	19.2857	2.2824	31.3601	10.0768			40.1296	10.0187	3.91981	15.6128	5.59609			40.1296	28.417	6.11264	26.4743	9.08837
	41.5134	20.0413	2.30754	32.6222	10.012			41.5134	10.4997	3.88275	16.0922	5.53334			41.5134	28.681	6.6551	27.4508	8.78146
	42.8972	20.6921	1.90089	32.2601	9.41275			42.8972	11.4915	4.01946	16.6276	5.48599			42.8972	28.6031	7.25695	27.6856	7.88865
	44.2809	21.9404	1.7616	33.0444	9.35449			44.2809	12.2186	4.18188	16.6568	5.55274			44.2809	28.9798	7.67242	28.2269	7.17926
	45.6647	22.8452	1.71216	33.9747	9.39229			45.6647	12.5263	4.11886	16.4413	5.32543			45.6647	28.4513	7.24271	29.095	6.75591
	47.0485	23.3676	1.80964	33.2255	8.60956			47.0485	12.2399	4.04162	17.4169	5.61655			47.0485	27.1969	5.68769	29.1253	6.48781
	48.4323	24.0003	2.12338	34.4856	8.36281			48.4323	12.2803	4.09381	17.8807	5.58018			48.4323	25.7575	4.22493	28.9574	6.02483
	49.8161	24.2562	2.12314	35.9654	8.47977			49.8161	12.5054	4.09473	18.2691	5.56135			49.8161	25.9435	4.26712	29.9233	6.11135
	51.1998	24.4586	1.92309	38.1722	8.44901			51.1998	12.961	4.25053	18.7848	5.52378			51.1998	26.208	4.5076	32.3552	6.94508
	52.5836	25.2447	2.00212	38.6938	8.06874			52.5836	13.4208	4.34675	19.622	5.68974			52.5836	27.3262	5.44203	34.4786	7.77135
	53.9674	25.3406	2.44205	39.1006	8.12645			53.9674	14.1938	4.4754	20.7379	5.98559			53.9674	27.4073	5.61515	35.3107	8.09743
	55.3512	26.1553	2.59538	40.7467	8.16097			55.3512	14.7116	4.51827	21.3702	6.00706			55.3512	26.9548	6.20084	36.3424	7.9755
	56.735	26.7651	2.79409	41.9842	7.73152			56.735	14.5959	4.45318	21.523	6.04742			56.735	26.0303	6.05732	37.2428	7.69539
	58.1187	26.8675	2.61184	41.4942	7.07532			58.1187	14.5215	4.63831	21.7988	5.9797			58.1187	25.2751	5.84922	37.8502	6.64686
	59.5025	26.0972	2.17868	42.9161	6.18645			59.5025	14.8169	4.71449	22.6475	6.09765			59.5025	24.2539	6.14486	37.2745	6.10244
	60.8863	26.3251	2.37619	44.1693	6.01019			60.8863	15.0266	4.73759	22.6514	5.9578			60.8863	24.2825	7.48858	34.9228	5.79429
	62.2701	26.7573	2.50788	45.3615	6.21743			62.2701	15.3074	4.84226	22.4798	5.78012			62.2701	24.5327	7.51188	32.5926	5.41481
	63.6538	26.9347	2.28932	46.591	6.71743			63.6538	15.2289	4.92811	23.0035	5.97612			63.6538	23.8563	7.17408	30.6564	5.02333
	65.0376	27.0546	2.08144	47.55	6.37926			65.0376	15.4973	5.01241	23.4568	6.05948			65.0376	24.8342	7.95452	29.2835	4.95778
	66.4214	26.8954	2.2721	48.2111	6.9247			66.4214	15.7591	4.88059	23.72	6.05583			66.4214	25.5502	8.69276	28.1753	4.82228
	67.8052	27.6813	2.36699	48.0237	7.40787			67.8052	16.0506	4.82784	24.8566	6.56869			67.8052	25.9167	9.06215	27.3946	5.0312
	69.189	28.3518	2.41456	49.371	7.30682			69.189	16.1842	4.93005	25.5076	6.80684			69.189	26.205	9.01567	26.9618	5.01003
	70.5727	28.19	2.1272	50.3889	7.47581			70.5727	16.4092	5.04279	25.5375	6.77855			70.5727	25.9713	8.74783	26.7683	4.87148
	71.9565	28.2257	2.01156	50.8375	7.65791			71.9565	16.8849	5.03839	25.4875	6.66311			71.9565	25.4698	8.07859	27.1437	4.86299
	73.3403	27.9748	1.89079	51.0704	7.55548			73.3403	17.1913	5.15172	26.201	6.98106			73.3403	24.1336	7.28071	27.1175	4.85764
	74.7241	27.9767	2.01336	51.8068	7.36855			74.7241	17.3036	5.21098	27.3407	7.29548			74.7241	23.357	7.06159	26.4294	4.60701
	76.1079	28.3983	1.82595	51.8618	8.04709			76.1079	17.3161	5.22274	27.9467	7.39058			76.1079	23.1865	6.87851	26.4057	4.5477
	77.4916	28.1144	1.86774	52.9188	8.46236			77.4916	17.5987	5.24982	28.1187	7.40179			77.4916	23.1927	6.33594	25.9842	4.60803
	78.8754	28.5152	1.76261	52.9833	7.95623			78.8754	17.7471	5.29713	28.3669	7.45791			78.8754	23.0081	5.53739	25.9852	4.72044
	80.2592	28.8405	2.02967	52.5479	7.59765			80.2592	17.7682	5.35025	28.4704	7.37407			80.2592	22.7689	5.08376	26.4373	4.69767
	81.643	28.3136	1.9654	51.9718	7.66393			81.643	18.1211	5.41647	28.865	7.31453			81.643	22.0157	4.79959	26.2442	4.6313
	83.0268	28.5307	1.93147	52.2869	7.53326			83.0268	18.4299	5.38207	29.2794	7.22792			83.0268	21.1479	4.45882	26.3422	4.83803
	84.4105	29.4306	2.10269	53.3774	8.09428			84.4105	18.626	5.48002	29.9747	7.42617			84.4105	20.4882	4.0546	26.392	4.83058
	85.7943	29.8401	1.9434	53.2397	8.10612			85.7943	18.8312	5.51394	29.771	7.50656			85.7943	20.7036	4.03435	26.2056	5.07387
	87.1781	29.3461	1.91437	53.5913	8.42498			87.1781	19.1882	5.73116	29.463	7.33669			87.1781	21.5101	4.31976	25.9944	4.99304
	88.5619	28.6381	2.21317	53.195	8.82441			88.5619	19.783	5.91616	30.0858	7.46845			88.5619	21.8816	4.35597	25.5681	4.71889
	89.9457	29.4212	2.28822	54.4117	9.07883			89.9457	19.55	5.86778	30.508	7.26879			89.9457	21.5186	4.11902	25.2193	4.86691
	91.3294	29.5386	2.17169	54.4718	9.36807			91.3294	19.5239	5.74225	30.7679	7.29029			91.3294	21.1264	3.94886	25.0122	4.92127
	92.7132	29.3916	1.88287	52.0401	9.09362			92.7132	20.0108	5.96376	30.949	7.26449			92.7132	21.6246	4.05981	24.7044	4.94036
	94.097	29.4294	2.00172	51.4368	8.24821			94.097	20.0752	6.09158	31.092	7.05737			94.097	22.448	4.25849	24.2471	4.91527
	95.4808	29.4082	2.15805	52.4375	7.94648			95.4808	20.2797	6.00662	30.879	6.44207			95.4808	22.3353	4.22218	23.9344	4.7038
	96.8646	30.1481	1.99053	52.8615	8.4451			96.8646	20.722	6.05166	31.1368	6.46052			96.8646	22.2159	4.06625	24.0173	4.79207
	98.2483	30.8828	2.28102	52.4337	8.22621			98.2483	20.8166	6.06658	31.5807	6.44525			98.2483	21.9968	3.87743	24.5146	5.10165
	99.6321	29.9544	2.21887	52.1827	8.49082			99.6321	20.7521	6.05778	31.8508	6.04419			99.6321	21.4968	3.61353	24.8581	5.17573
	101.016	30.2049	2.12384	52.9	8.96872			101.016	20.9422	6.17967	32.9062	6.29761			101.016	20.8516	3.30168	25.0136	4.99748
	102.4	29.9569	2.19374	53.6443	8.45267			102.4	20.8191	6.21133	33.7613	6.74464			102.4	20.8179	3.30213	25.4593	5.05284
	103.783	29.6024	2.03739	52.6864	8.01518			103.783	20.917	6.291	33.8115	6.33697			103.783	20.1246	3.01607	25.7749	5.10675
	105.167	29.3616	2.03613	50.9776	8.08666			105.167	21.0045	6.29966	33.3216	5.72962			105.167	20.2191	3.06439	25.3317	5.12139
	106.551	29.9609	2.3952	52.2424	8.26585			106.551	21.577	6.46084	33.5379	5.78336			106.551	20.6098	3.34874	24.6994	5.15761
	107.935	29.6	2.31215	52.7125	7.71265			107.935	21.5591	6.38417	34.2936	6.02473			107.935	20.4648	3.25941	24.6109	5.22552
	109.319	29.9202	2.36922	52.8811	7.62994			109.319	21.3833	6.36975	35.2212	6.31011			109.319	20.7171	3.35667	25.2216	5.34834
	110.702	29.6796	2.32502	51.5615	7.85596			110.702	21.3615	6.37756	34.893	6.27132			110.702	20.6726	3.37684	25.5035	5.24084
	112.086	28.7283	2.10525	52.2527	8.26919			112.086	21.3646	6.41105	34.5911	6.00004			112.086	20.9808	3.50765	25.6644	5.10804
	113.47	29.0199	2.1058	53.9049	8.81262			113.47	21.5928	6.37685	35.0597	5.97705			113.47	21.2733	3.5478	25.9955	5.19942
	114.854	29.312	2.31272	53.1096	7.82527			114.854	21.4221	6.37464	35.5971	6.02046			114.854	21.2806	3.33619	25.8808	5.14767
	116.237	29.54	2.19321	51.9548	7.51001			116.237	21.1205	6.25028	35.6445	5.77941			116.237	21.4107	3.33874	25.8895	5.20643
	117.621	29.3343	2.48408	50.7688	8.23166			117.621	20.8758	6.10857	35.4317	5.39146			117.621	21.6931	3.27863	26.0206	5.35428
	119.005	29.1759	2.27892	50.0752	7.45522			119.005	21.1319	6.32497	35.1049	5.14385			119.005	21.9354	3.40168	25.9707	5.30564
	120.389	28.631	2.35731	50.67	7.11965			120.389	21.4142	6.4552	35.6632	5.32403			120.389	22.1113	3.5159	26.0809	5.10771
	121.773	28.9982	2.49593	51.4705	7.72041			121.773	21.3928	6.49427	35.736	5.36426			121.773	21.8006	3.70597	26.3373	5.09933
	123.156	29.868	2.73943	51.6111	7.85951			123.156	21.0767	6.31124	35.6747	5.27574			123.156	21.7072	3.78373	26.0773	5.07432
	124.54	29.7582	2.5811	52.3125	8.01302			124.54	21.4041	6.3995	35.7498	5.14441			124.54	21.2677	3.75496	25.8638	5.09369
	125.924	29.6931	2.38652	52.1858	7.77359			125.924	21.303	6.47052	35.7296	4.61581			125.924	21.3952	3.73343	26.0555	5.0698
	127.308	29.485	2.26343	51.2881	7.74428			127.308	21.2806	6.47209	36.0831	4.38439			127.308	21.8534	3.84106	26.043	5.00074
	128.691	29.6659	2.49126	50.7322	7.29385			128.691	21.1572	6.34931	36.5963	4.61869			128.691	21.7382	3.75467	26.201	5.14881
	130.075	29.3753	2.33085	50.6724	7.24594			130.075	20.9548	6.34613	36.4864	4.71304			130.075	21.5698	4.04645	26.6546	5.16193
	131.459	29.7424	2.38351	50.7323	7.60251			131.459	20.9899	6.42618	37.2317	4.43434			131.459	21.5318	4.51443	26.6078	4.98027
	132.843	29.5062	2.43641	51.4362	7.80254			132.843	21.2754	6.47503	37.2681	4.21478			132.843	21.3892	4.47369	26.7969	4.98653
	134.227	28.7516	2.30539	52.0564	7.68616			134.227	21.1248	6.40374	36.5973	3.84618			134.227	21.2321	4.35523	27.2568	4.99415
	135.61	29.4014	2.31225	51.835	6.92639			135.61	21.2819	6.50077	36.6415	3.75672			135.61	21.4035	4.34602	26.8681	4.88076
	136.994	29.5086	2.29561	51.171	6.95974			136.994	21.2751	6.41396	36.8829	3.80424			136.994	21.9468	4.22436	27.357	4.98686
	138.378	30.1692	2.59046	50.9292	6.71932			138.378	21.2615	6.35175	37.3638	3.76309			138.378	22.2883	4.24814	27.7671	5.08791
	139.762	30.3148	2.88349	50.7202	6.50682			139.762	21.3732	6.59384	37.0109	3.79091			139.762	22.5016	4.2215	27.3093	4.91417
	141.145	29.5224	2.69882	51.1482	7.2583			141.145	21.2111	6.53597	36.1887	3.09652			141.145	22.2919	4.39719	27.2773	4.81873
	142.529	29.0193	2.19051	51.9916	7.15425			142.529	21.0198	6.46337	36.0628	2.9575			142.529	21.9232	4.46168	27.6704	4.76172
	143.913	29.7407	2.30929	50.1809	7.00053			143.913	21.0121	6.44574	35.8465	3.36949			143.913	21.9101	4.78415	27.7671	4.58948
	145.297	29.6679	2.66211	49.9109	6.7483			145.297	21.3894	6.51878	35.2582	3.2633			145.297	22.1897	4.82039	27.9696	4.62664
	146.681	29.5071	2.56502	49.9986	7.04767			146.681	21.2384	6.47676	35.486	3.11629			146.681	22.0318	4.65536	27.7979	4.51206
	148.064	29.613	2.56038	49.6177	7.25845			148.064	21.0937	6.43763	36.1255	2.94572			148.064	22.4016	4.61524	27.5477	4.46807
	149.448	29.8152	2.52906	50.0983	6.61238			149.448	20.9191	6.34503	36.2455	3.15585			149.448	22.5526	4.67483	27.8474	4.80227
	150.832	30.0757	2.76854	50.1377	6.86946			150.832	20.9702	6.42587	36.1315	2.6488			150.832	22.7565	4.78027	27.6049	4.77552
	152.216	29.3722	2.47567	51.2387	6.75068			152.216	21.13	6.46966	35.9537	2.64382			152.216	22.5534	4.53644	27.0738	4.57923
	153.6	29.6145	2.68569	50.544	7.48097			153.6	21.138	6.4457	36.1961	3.5293			153.6	22.0315	4.22928	27.1041	4.85618
	154.983	29.6778	2.63176	50.6813	7.25117			154.983	21.3799	6.58415	35.6403	3.57112			154.983	22.4276	4.55956	27.0092	4.83833
	156.367	29.5918	2.5498	50.7327	6.89713			156.367	21.3689	6.65632	35.7309	3.15226			156.367	22.6968	4.62039	26.6255	4.68421
	157.751	29.3142	2.60099	51.4636	6.57336			157.751	21.2734	6.53169	35.9628	2.87812			157.751	23.1857	4.81204	27.2288	4.79425
	159.135	29.8225	2.83482	51.164	6.51575			159.135	21.3766	6.46946	36.0115	2.78711			159.135	23.2957	4.72502	27.2035	4.83233
	160.518	29.3858	2.63616	50.8196	5.97284			160.518	21.3581	6.59288	35.8101	2.45247			160.518	23.4644	4.57569	27.2903	4.76688
	161.902	29.447	2.65742	50.4807	5.72704			161.902	21.4977	6.66853	35.8333	2.24046			161.902	23.6696	4.55858	27.306	4.60446
	163.286	30.1316	2.84522	50.2352	6.06909			163.286	21.2879	6.56829	36.0012	2.43163			163.286	23.7699	4.70296	27.349	4.55068
	164.67	29.4116	2.71093	51.1827	6.56124			164.67	21.0534	6.39947	36.1543	2.49666			164.67	23.5493	4.77546	27.4858	4.77434
	166.054	29.1229	2.43795	51.6887	6.29451			166.054	21.2119	6.40056	36.8632	2.61408			166.054	23.2593	4.67101	27.6367	4.85718
	167.437	29.7417	2.71793	51.3088	6.6062			167.437	21.4139	6.48362	36.3889	2.60514			167.437	23.5086	4.647	28.4774	4.88919
	168.821	30.5191	2.86491	51.477	7.22715			168.821	21.4146	6.51377	36.4798	2.64024			168.821	23.2812	4.69763	28.6541	4.63825
	170.205	30.6308	2.99686	51.6875	6.64749			170.205	21.5181	6.36924	36.873	2.60959			170.205	23.8113	5.22625	28.299	4.51347
	171.589	29.525	2.81788	50.2738	6.60099			171.589	21.3314	6.35792	36.007	2.51591			171.589	23.5682	5.18392	28.5881	4.60249
	172.972	29.6019	2.8641	49.964	7.04192			172.972	21.2207	6.45059	35.7521	2.66389			172.972	23.1416	5.33743	28.5632	4.44173
	174.356	29.9685	2.9131	51.6459	6.96516			174.356	21.1345	6.45554	36.0749	2.63902			174.356	23.4523	5.58664	28.8591	4.36189
	175.74	29.1448	2.6408	52.3167	6.4872			175.74	21.4801	6.52718	36.7879	2.13391			175.74	23.599	5.43247	29.0813	4.34272
	177.124	28.9276	2.6087	52.1895	6.55281			177.124	21.4875	6.43148	36.6975	1.80631			177.124	23.7679	5.17142	29.4802	4.40182
	178.508	29.477	2.63423	53.1817	6.67384			178.508	21.3706	6.32957	37.3673	2.19459			178.508	23.9855	5.04979	29.8327	4.5473
	179.891	29.8718	2.63489	53.4471	6.83232			179.891	21.3514	6.3223	37.4788	1.99624			179.891	24.2652	5.34606	29.9957	4.68014
	181.275	30.277	2.65261	54.1988	6.50511			181.275	21.3704	6.45074	37.4907	1.38314			181.275	24.4497	5.58539	30.2016	4.58047
	182.659	29.7257	2.68624	55.1706	6.14863			182.659	21.2691	6.38637	37.8862	1.20454			182.659	24.139	5.43322	30.3018	4.54376
	184.043	30.0794	2.64974	55.0207	7.22319			184.043	21.2185	6.41769	38.0671	1.14503			184.043	24.134	5.29553	30.6088	4.64068
	185.426	29.1961	2.81101	54.4669	7.46249			185.426	21.1362	6.41016	38.006	1.25545			185.426	24.4167	5.28992	30.3867	4.39644
	186.81	29.393	2.8871	53.8729	6.75131			186.81	21.4254	6.54036	37.4097	1.2464			186.81	24.7413	5.33271	30.5469	4.29479
	188.194	29.8056	3.22007	53.7646	6.58929			188.194	21.5478	6.54608	37.8239	0.883526			188.194	24.6665	5.26093	30.7981	4.29019
	189.578	29.862	3.10823	52.9607	6.77157			189.578	21.3764	6.47723	38.6819	0.825565			189.578	24.7851	5.4605	30.5903	3.916
	190.962	29.863	2.78664	53.22	6.71239			190.962	21.2206	6.48216	38.7101	0.815612			190.962	24.9946	5.68424	30.0771	3.9858
	192.345	29.2543	2.82124	53.5593	5.76103			192.345	21.3966	6.50908	38.637	1.3373			192.345	24.826	5.56581	29.6105	4.22682
	193.729	29.7714	2.9928	52.1572	6.319			193.729	21.63	6.44469	38.929	1.61764			193.729	25.1632	5.67328	29.4951	4.17921
	195.113	29.8552	2.61299	53.4817	6.66605			195.113	21.7433	6.56185	39.4539	1.59422			195.113	25.7651	6.07134	30.0523	4.06428
	196.497	29.9153	2.94932	55.1516	6.41168			196.497	21.5629	6.65581	38.899	1.37124			196.497	25.7164	6.05608	30.0088	4.06935
	197.88	30.3611	3.07669	54.5072	7.0841			197.88	21.3935	6.62418	38.2626	0.906036			197.88	25.733	5.66985	29.4848	4.28144
	199.264	30.2876	3.0045	54.365	6.18987			199.264	21.5806	6.50272	38.5584	1.19639			199.264	26.2933	5.58668	29.3858	4.40496
	200.648	29.9242	3.03725	55.0932	6.66044			200.648	21.7299	6.47589	38.4156	1.52385			200.648	26.4824	5.90412	29.6868	4.28792
	202.032	29.7114	3.17299	56.0564	6.52518			202.032	21.6185	6.4958	38.6798	1.2894			202.032	26.6554	6.16206	29.527	4.16127
	203.416	30.7142	3.11904	55.9377	6.97307			203.416	21.6026	6.50752	38.6218	1.46558			203.416	25.7545	5.52564	29.4205	4.22385
	204.799	31.0679	3.29852	56.8459	7.36785			204.799	21.4637	6.45546	39.3716	1.52833			204.799	25.7855	5.35665	29.794	4.21197
	206.183	31.0738	3.1116	57.2218	6.87497			206.183	21.5533	6.36625	40.2323	1.2215			206.183	26.3552	5.41955	30.0593	3.96567
	207.567	30.8647	3.32799	57.5159	6.24438			207.567	21.7299	6.39394	41.3412	1.43965			207.567	26.7859	5.56249	30.5922	3.95684
	208.951	31.0204	3.02173	57.8411	6.8456			208.951	21.8614	6.43796	41.4389	1.30689			208.951	26.3003	5.70395	31.3191	3.97176
	210.334	31.755	3.23505	58.0985	6.90871			210.334	21.7822	6.46903	41.2807	1.10768			210.334	26.2377	5.50869	31.6062	3.88732
	211.718	31.958	3.33871	57.8032	6.60372			211.718	21.9408	6.60479	40.8121	1.0506			211.718	26.6674	5.86663	31.596	4.05525
	213.102	31.6034	3.25279	58.7185	7.39822			213.102	22.1137	6.59011	40.7624	1.1017			213.102	26.4516	5.80591	31.4395	4.05592
	214.486	32.502	3.34704	59.0667	7.26739			214.486	22.5219	6.73305	41.6479	1.31352			214.486	26.6504	5.7033	31.6138	4.00964
	215.87	32.2856	3.40013	59.5619	7.59476			215.87	22.3277	6.66564	41.2555	1.54958			215.87	26.9357	5.85649	31.6601	4.25469
	217.253	32.418	3.53464	60.3998	7.73275			217.253	22.3844	6.7133	41.4191	1.35888			217.253	26.7043	5.81405	30.6381	4.30737
	218.637	31.9046	3.62583	59.7488	8.02083			218.637	22.2383	6.77062	41.4101	1.50323			218.637	26.9585	5.87787	30.0368	4.2457
	220.021	31.748	3.30168	58.3095	7.53866			220.021	22.3872	6.86155	40.3759	1.25634			220.021	27.1709	5.92755	30.0305	4.29589
	221.405	32.0927	3.45797	58.5455	6.80618			221.405	22.3658	6.77503	40.4663	0.979549			221.405	26.7436	5.46328	30.0512	4.34977
	222.788	31.7145	3.38609	60.2603	7.53654			222.788	22.0343	6.74395	40.3247	0.852467			222.788	26.9649	5.57071	30.3265	4.26662
	224.172	32.1431	3.37288	62.1137	7.69421			224.172	21.808	6.6402	41.0784	1.12271			224.172	27.4785	5.75834	31.1202	4.1234
	225.556	31.9868	3.46163	61.6751	7.09779			225.556	22.0579	6.62648	41.8885	1.41178			225.556	26.8216	5.37623	31.9107	3.80293
	226.94	32.218	3.62154	60.7534	6.42431			226.94	22.077	6.78153	42.2154	1.45926			226.94	26.8986	5.31757	31.8592	3.46054
	228.324	32.1409	3.35065	60.8305	6.75788			228.324	22.1205	6.81127	41.6582	1.21738			228.324	27.536	5.4768	31.7745	3.38652
	229.707	32.5354	3.62285	61.4379	6.70927			229.707	22.3814	6.90971	41.4556	1.18446			229.707	27.2838	5.51831	31.9726	3.73588
	231.091	32.1608	3.68917	61.4407	7.04133			231.091	22.2659	6.92373	42.141	1.2967			231.091	27.7767	5.95162	32.2261	4.2734
	232.475	32.1416	3.57909	62.4378	6.41243			232.475	21.8841	6.64982	42.0936	1.35347			232.475	27.568	6.12902	31.8969	4.45879
	233.859	32.4098	3.38873	62.8214	5.91667			233.859	21.9787	6.70463	42.1208	1.79734			233.859	27.384	5.82396	31.7743	4.49496
	235.242	32.5207	3.3712	63.9078	6.21058			235.242	22.3519	6.8031	43.0377	1.9497			235.242	27.0354	5.67471	31.82	4.38397
	236.626	32.9549	4.0891	65.1633	6.34239			236.626	21.9225	6.77625	43.1457	1.57229			236.626	27.5546	5.70646	31.7222	4.36752
	238.01	33.3399	4.18199	65.9414	6.75622			238.01	21.9942	6.83164	42.5068	1.34877			238.01	28.0722	5.6052	31.7362	4.2963
	239.394	33.0834	3.83102	65.5353	6.72057			239.394	22.0881	6.92837	42.1798	1.57195			239.394	27.7542	5.3356	31.6988	4.17073
	240.778	33.5697	3.88951	64.3823	5.90551			240.778	22.0663	6.85986	42.4146	2.06372			240.778	27.7564	5.67599	32.2675	4.01728
	242.161	33.1844	3.79053	63.3247	6.20465			242.161	21.9092	6.74298	42.4588	2.0553			242.161	28.0908	5.85956	32.6776	3.98249
	243.545	32.7268	3.66895	64.4887	6.84278			243.545	21.6667	6.81208	42.8539	2.16602			243.545	27.5806	5.90951	32.4983	3.92186
	244.929	32.7401	3.66644	67.1455	6.18351			244.929	21.6362	6.80799	42.6601	2.61618			244.929	26.987	5.78937	32.3006	3.6277
	246.313	33.6625	3.71984	66.6401	5.70088			246.313	21.5776	6.77001	42.1399	2.57034			246.313	26.9552	5.87396	32.1702	3.41029
	247.696	33.1388	3.6144	66.4076	6.26657			247.696	21.4784	6.67145	42.5761	2.66743			247.696	27.044	5.84262	32.506	3.62292
	249.08	33.5476	3.84795	67.8416	6.77699			249.08	21.6438	6.70318	42.5735	2.12852			249.08	27.685	6.02095	32.1967	3.89801
	250.464	34.0423	3.98472	66.6096	6.66675			250.464	21.5683	6.53161	41.8706	1.932			250.464	27.8514	6.10794	31.6138	3.92654
	251.848	33.2903	4.08031	65.3418	6.53882			251.848	21.6955	6.52654	43.0113	2.00373			251.848	27.9248	5.96101	31.2076	3.67665
	253.232	32.7322	4.21221	67.1109	6.40644			253.232	21.7507	6.52768	43.3214	1.92241			253.232	28.1366	5.96091	31.0985	3.96412
	254.615	33.5432	4.21754	69.0467	6.50359			254.615	21.6031	6.59415	42.7728	1.62117			254.615	28.4388	6.15082	30.816	4.04304
	255.999	33.2298	3.72796	67.6138	6.73005			255.999	21.6698	6.66465	42.7204	1.49008			255.999	28.4031	5.91683	30.9138	4.08219
	257.383	33.9902	3.78126	67.6803	6.63181			257.383	21.5471	6.59976	42.6455	1.52569			257.383	27.4328	5.32241	31.1068	4.34727
	258.767	34.1068	4.22114	69.9134	7.01339			258.767	21.6313	6.70148	42.1288	1.92789			258.767	27.7948	5.54527	31.4582	4.18718
	260.151	34.3653	4.47425	69.486	7.16786			260.151	21.9764	6.80585	42.6395	1.55168			260.151	28.0576	5.56479	31.9671	3.82235
	261.534	34.529	4.14349	69.2582	6.90552			261.534	21.8244	6.70913	42.9208	1.51032			261.534	28.1589	5.77466	32.2263	3.70101
	262.918	33.9812	4.19391	71.7288	6.29664			262.918	21.839	6.73899	42.8142	1.95549			262.918	28.3368	6.1814	32.6393	3.60171
	264.302	33.6075	4.12653	71.4393	6.93685			264.302	21.959	6.83679	43.1023	1.64417			264.302	28.5549	6.37183	32.4596	3.538
	265.686	34.8706	4.72592	70.3451	6.58906			265.686	21.7988	6.77434	43.2747	1.52049			265.686	28.3074	6.2851	32.6313	3.77874
	267.069	34.7839	4.52479	69.9595	6.50091			267.069	21.9023	6.83851	43.0138	1.80637			267.069	28.1419	6.26204	32.9191	3.98178
	268.453	34.4251	4.26262	70.5862	6.58941			268.453	21.9714	6.81696	42.6074	1.45531			268.453	27.6349	6.14182	32.3082	4.02946
	269.837	34.4975	4.37797	70.8622	7.19909			269.837	21.7901	6.92447	41.9029	0.858164			269.837	27.7765	6.38115	31.8562	3.67159
	271.221	34.4687	4.77976	70.3664	7.36815			271.221	21.9579	7.07676	42.1887	0.640611			271.221	27.2233	6.19537	31.6959	3.6013
	272.605	34.9075	4.713	70.9261	6.76964			272.605	22.0851	7.02169	43.2237	0.988914			272.605	27.4018	6.12992	31.9549	3.9529
	273.988	35.26	4.66127	70.8017	7.00485			273.988	22.1803	6.96984	43.2592	1.09507			273.988	28.4988	6.38873	32.3453	4.2121
	275.372	35.1687	4.83968	70.9361	6.18824			275.372	21.9003	6.84644	42.8043	1.22042			275.372	29.0029	6.33586	32.509	4.20304
	276.756	35.7662	4.75204	71.7626	6.48865			276.756	21.8747	6.89903	42.2276	1.30801			276.756	28.4242	6.01026	32.4196	4.04693
	278.14	35.6892	4.65134	72.3716	7.32298			278.14	22.0163	6.92672	42.823	1.14892			278.14	28.1341	5.71369	32.6522	4.26654
	279.523	34.4674	4.28057	72.7442	7.2709			279.523	22.099	6.93784	43.794	0.89272			279.523	28.2193	5.70188	33.4253	4.48108
	280.907	35.4209	4.79148	74.708	7.28865			280.907	21.9546	6.80315	44.2556	0.720668			280.907	27.567	5.43981	33.9517	4.68623
	282.291	34.4289	4.20868	73.1914	6.41365			282.291	21.9863	6.7799	43.7241	0.526546			282.291	27.2681	5.22534	33.6531	4.5237
	283.675	34.8612	4.14997	71.436	6.58399			283.675	21.8594	6.89891	42.8496	0.984219			283.675	27.3834	5.42036	33.4835	4.46403
	285.059	35.4409	4.72733	71.6937	7.35903			285.059	21.7822	7.00871	42.7516	1.4686			285.059	27.8609	5.81731	33.6724	4.56796
	286.442	35.1467	4.56107	72.1506	6.93072			286.442	21.8937	6.96958	42.5138	1.00487			286.442	28.4957	5.67974	33.38	4.33993
	287.826	35.4497	4.44388	73.8673	6.76095			287.826	22.0026	6.96074	42.4012	1.10522			287.826	28.7131	5.60171	33.0803	3.92691
	289.21	35.5142	5.06813	72.0377	6.62479			289.21	21.8151	6.78496	42.2587	1.45195			289.21	28.5299	5.49063	32.7471	3.64898
	290.594	35.4617	4.69732	72.07	6.13969			290.594	21.8867	6.86665	42.1681	1.41007			290.594	28.5819	5.49544	33.0305	3.61808
	291.977	35.4187	4.74737	73.0414	6.35271			291.977	21.808	6.81531	42.256	1.49228			291.977	29.1021	5.65928	33.0086	3.63167
	293.361	35.6282	4.7044	70.0585	6.87864			293.361	21.7008	6.69979	42.7973	1.35625			293.361	29.059	5.31631	33.3475	3.89275
	294.745	35.912	5.04371	71.7025	6.93177			294.745	22.106	6.89107	42.5889	1.35762			294.745	28.9558	5.16786	33.5125	4.05763
	296.129	36.3646	5.12255	73.5736	6.82336			296.129	22.1081	6.96517	41.8261	1.83968			296.129	29.2488	5.53062	33.5883	3.83422
	297.513	36.1487	4.94515	74.0441	6.38204			297.513	22.2273	7.06731	42.8765	1.84965			297.513	29.9327	5.77871	33.2805	3.656
	298.896	35.0283	4.73002	73.2319	6.95072			298.896	22.3252	7.04614	43.3484	1.70629			298.896	29.4599	5.25485	33.0261	3.53403
	300.28	36.3538	5.34312	73.092	7.51784			300.28	22.1824	6.92429	42.9397	1.99247			300.28	29.9641	5.05865	33.1232	3.76454
	301.664	36.2405	5.65216	73.1031	7.51582			301.664	21.8482	6.92594	42.7251	2.00473			301.664	30.428	5.2582	33.1766	4.0091
	303.048	36.4058	5.19819	73.9381	7.58725			303.048	22.1919	7.21007	42.1319	1.91183			303.048	30.3634	5.63533	33.2232	4.06355
	304.431	35.8995	4.85648	74.5027	7.74491			304.431	22.0017	7.1032	42.8778	2.00789			304.431	29.4835	5.52921	33.0871	4.3171
	305.815	35.8939	4.85648	74.241	7.92427			305.815	21.882	7.0314	43.073	1.92446			305.815	28.7515	5.56403	33.342	4.2743
	307.199	35.7458	5.03041	73.2041	7.13211			307.199	22.0263	7.00405	42.7776	1.70668			307.199	28.1535	5.92769	33.6691	4.11633
	308.583	35.3162	5.15915	73.1632	6.95078			308.583	22.1202	7.09353	42.8113	1.842			308.583	27.8157	5.88044	34.1004	3.88073
	309.967	35.0677	5.20537	73.4089	7.62142			309.967	22.2998	7.23261	42.9652	2.14513			309.967	27.8204	5.74138	33.9998	3.76033
	311.35	34.9152	5.05744	72.5685	6.95664			311.35	22.103	7.28241	43.3002	2.55726			311.35	28.1518	5.93253	33.2385	3.35567
	312.734	36.084	5.60443	72.8599	6.70078			312.734	21.9754	7.17466	43.2673	2.29126			312.734	28.2371	5.95221	33.5646	3.23908
	314.118	36.0931	5.55283	74.3342	6.64433			314.118	22.4087	7.23912	42.6817	2.22802			314.118	27.8888	5.71183	33.9422	3.43322
	315.502	36.3154	5.95786	74.6166	6.95606			315.502	22.8521	7.36503	43.2936	2.15959			315.502	27.9285	5.65689	34.8109	3.41513
	316.885	35.9488	5.47685	75.0148	6.32542			316.885	22.341	7.41999	44.4492	2.08444			316.885	28.4808	5.93103	35.1576	3.43118
	318.269	35.4313	5.02633	75.1891	6.94291			318.269	22.0841	7.31479	44.2893	1.87246			318.269	28.3657	5.93772	34.9675	3.46722
	319.653	35.2243	5.16052	74.4763	6.34932			319.653	21.9384	7.31327	44.1463	2.16732			319.653	28.6715	6.04943	35.5611	3.48007
	321.037	34.6978	5.41841	73.878	5.82294			321.037	21.9801	7.16944	44.2488	2.07524			321.037	29.3692	5.88349	36.0035	3.50745
	322.421	35.1172	5.33811	72.6401	5.68725			322.421	22.3445	7.32668	44.787	1.76075			322.421	29.3182	5.68542	36.1002	3.75219
	323.804	35.2092	5.26442	72.8204	5.54545			323.804	22.3384	7.43683	43.8883	1.63016			323.804	29.1116	5.69567	35.9434	3.81266
	325.188	35.2419	5.3888	73.355	6.21975			325.188	22.1762	7.26584	42.9784	1.83957			325.188	29.4996	5.95382	36.0782	3.9573
	326.572	35.3134	5.53866	72.1924	5.39127			326.572	22.0789	7.28779	43.0467	1.95615			326.572	29.344	6.26761	35.2136	3.77792
	327.956	35.2081	5.05519	72.0164	4.93041			327.956	21.8367	7.05937	43.7146	2.01382			327.956	28.9875	6.21018	34.3646	3.60486
	329.339	34.9422	4.75788	72.3621	4.93434			329.339	21.8353	7.01124	43.9545	1.87492			329.339	29.0834	6.15381	33.8403	3.5706
	330.723	34.6331	5.43685	70.9187	5.41408			330.723	22.1147	7.0885	44.0004	2.45731			330.723	29.1343	6.34881	33.5406	3.64223
	332.107	35.3655	5.73099	70.7592	4.20923			332.107	21.8152	7.01316	43.4572	3.0314			332.107	28.8088	6.44099	33.1761	3.76923
	333.491	34.7222	5.43919	69.2638	4.08794			333.491	21.7339	7.07146	42.8177	3.17538			333.491	28.5408	6.27306	33.379	3.86157
	334.875	34.4293	5.09145	69.3512	4.21658			334.875	21.4636	6.98863	42.8333	2.98673			334.875	28.6858	6.41652	34.0169	3.94079
	336.258	34.0099	5.04175	70.4411	3.966			336.258	21.2855	6.88858	42.4582	2.78199			336.258	28.5517	6.25377	34.2444	3.73832
	337.642	33.5631	4.77504	70.3352	4.41681			337.642	21.4105	6.95795	42.7658	2.63203			337.642	28.2178	5.90856	34.1214	3.57128
	339.026	34.1874	5.12055	69.3803	5.15905			339.026	21.5104	6.96368	42.7883	3.18693			339.026	28.5596	6.25425	33.8131	3.571
	340.41	33.7694	4.85977	69.9965	4.00766			340.41	21.5705	7.04763	42.9154	3.66666			340.41	28.3124	6.31967	33.5531	3.45175
	341.793	34.0742	4.83916	70.7823	4.18265			341.793	21.6196	7.1335	43.0656	3.69899			341.793	27.7136	6.1139	33.3243	3.22469
	343.177	34.0022	5.12695	68.1301	4.22628			343.177	21.6196	6.99814	42.9058	3.38688			343.177	28.0096	6.0258	32.9922	3.3263
	344.561	33.5925	4.7595	67.6185	4.35467			344.561	21.5458	6.83386	42.985	3.28116			344.561	27.9096	5.71166	33.187	3.38901
	345.945	33.565	4.57361	68.5356	4.71099			345.945	21.3918	6.7499	43.1381	3.54086			345.945	28.2526	5.6041	33.5177	3.70518
	347.329	34.2128	4.60652	67.5338	4.23658			347.329	21.3206	6.70886	42.706	3.44719			347.329	28.687	5.53479	34.507	3.91258
	348.712	33.5536	4.75569	67.8772	3.81552			348.712	21.3699	6.68619	42.9724	3.28758			348.712	28.7035	5.77862	35.072	3.806
	350.096	33.1656	4.99694	69.0724	4.3856			350.096	21.0181	6.63132	42.3496	3.07361			350.096	27.8697	5.91243	34.878	3.51313
	351.48	32.9646	4.47419	67.4074	3.88775			351.48	21.1639	6.57709	42.2453	2.993			351.48	27.3528	5.86756	34.2105	3.22577
	352.864	33.4459	4.61064	67.6611	3.50843			352.864	21.4705	6.56741	43.2302	2.87366			352.864	28.1912	5.98479	33.6232	2.99412
	354.248	33.4322	4.90884	69.7603	3.6166			354.248	21.1306	6.65062	43.9333	3.1163			354.248	28.1407	5.83576	33.8411	2.92563
	355.631	32.1062	4.73516	69.3144	3.45648			355.631	21.3344	6.72258	43.9761	3.59947			355.631	27.9904	5.76664	34.4323	3.03912
	357.015	32.6817	4.86342	67.6609	3.32289			357.015	21.2578	6.83364	43.9782	3.47551			357.015	27.9249	5.60064	34.3416	3.06201
	358.399	32.4548	4.96782	67.0029	3.45766			358.399	21.177	6.77117	43.8533	3.45094			358.399	27.7709	5.78103	35.1029	3.07827
	359.783	31.6384	4.98425	67.9805	4.30861			359.783	20.7057	6.69013	43.6728	3.54116			359.783	27.9939	6.21071	35.8395	3.25164
	361.166	31.9595	4.95855	67.7575	4.84706			361.166	20.7429	6.78808	43.7615	3.77561			361.166	27.6536	5.92509	35.8679	3.15407
	362.55	31.2664	4.53697	66.3784	4.07571			362.55	20.9839	6.73785	44.0146	3.82877			362.55	27.7046	5.7469	35.6646	2.98515
	363.934	31.732	4.78438	64.8805	3.5707			363.934	21.1798	6.76076	43.8718	3.82286			363.934	27.5505	5.62989	34.936	3.01084
	365.318	32.2636	5.13736	65.5535	3.76924			365.318	20.9819	6.89484	43.5187	3.62098			365.318	27.8748	5.76472	34.5126	3.11557
	366.702	32.5068	5.06314	65.9077	3.94134			366.702	20.9683	6.88016	42.4144	3.36014			366.702	26.9715	5.52039	34.7383	3.22805
	368.085	31.6796	4.68548	65.3013	2.87965			368.085	20.8861	6.73448	42.1803	3.79785			368.085	27.4064	5.89361	34.4136	2.87197
	369.469	31.4776	4.59414	65.1623	2.93265			369.469	21.138	6.89142	43.0984	4.12491			369.469	27.1901	5.75566	33.8489	2.69859
	370.853	30.8096	4.47254	65.3335	4.01913			370.853	20.9092	6.8074	43.0611	3.96675			370.853	26.9756	5.73402	33.8119	2.94592
	372.237	31.5102	4.66873	64.9372	3.5256			372.237	20.5697	6.61081	42.5175	3.6116			372.237	26.5321	5.94599	33.6578	2.90968
	373.62	31.316	4.79971	64.4539	3.56172			373.62	20.6352	6.70076	42.1348	3.35759			373.62	26.3878	6.25106	33.5465	2.98168
	375.004	31.4637	5.03539	64.4278	3.9561			375.004	20.8081	6.75814	41.6957	3.51385			375.004	26.4706	6.36621	33.7704	3.20036
	376.388	30.9352	4.84529	65.1998	4.02589			376.388	20.834	6.81235	42.4331	3.66677			376.388	26.5021	6.50541	33.9978	3.26261
	377.772	30.6201	4.80557	65.0895	3.65218			377.772	20.802	6.68436	42.8377	3.7169			377.772	27.2062	7.08121	34.713	3.23823
	379.156	31.3853	4.6467	64.8578	2.81908			379.156	20.7103	6.60241	42.3471	3.89598			379.156	27.302	7.10815	35.0583	3.30162
	380.539	30.8385	4.74377	63.663	2.92982			380.539	20.8884	6.76424	42.9142	4.18233			380.539	27.2132	6.9083	35.2251	3.22012
	381.923	31.3502	4.78363	63.4825	2.58879			381.923	20.8444	6.97281	42.9095	3.9817			381.923	26.5554	6.19348	35.0052	2.95306
	383.307	31.8886	4.87254	62.9278	3.24302			383.307	20.6469	6.94085	42.5922	4.08569			383.307	26.7848	6.20014	34.086	3.13884
	384.691	31.4667	5.28456	64.2718	4.10954			384.691	21.0482	7.23243	42.9856	4.42339			384.691	27.4385	6.52611	34.1164	3.33978
	386.074	30.8855	5.29934	63.9086	3.87835			386.074	20.5469	7.0454	42.7078	4.41848			386.074	27.7161	6.96762	34.3926	3.61372
	387.458	30.87	5.1741	63.1459	3.66236			387.458	20.8667	7.04397	42.2654	4.58495			387.458	27.6347	6.79331	34.7336	3.72417
	388.842	31.3485	5.23894	62.8529	3.85757			388.842	21.0764	7.10085	42.4387	4.28979			388.842	27.3259	6.61009	35.0251	3.45814
	390.226	31.879	5.1772	62.9622	3.33336			390.226	20.9688	7.13057	42.3422	3.91425			390.226	27.2176	6.85637	35.0954	3.15475
	391.61	31.0847	5.85877	64.2053	2.22487			391.61	20.985	7.26468	42.3872	4.10629			391.61	27.0728	6.74203	34.8406	2.79277
	392.993	30.5086	5.71299	63.2716	2.78466			392.993	20.9598	7.26511	41.9554	4.62401			392.993	27.231	6.53689	34.2873	2.77219
	394.377	30.4715	5.60917	62.3737	3.04565			394.377	20.9165	7.28554	41.3434	4.81214			394.377	27.6833	6.89761	33.9708	3.09266
	395.761	29.9644	5.37088	61.898	3.20261			395.761	20.7993	7.29476	41.55	4.91825			395.761	27.8237	7.24386	33.7393	3.06813
	397.145	31.0887	5.62797	61.2391	3.23786			397.145	20.6228	7.12496	41.9241	4.76302			397.145	27.0515	6.8034	33.3959	3.13548
	398.528	30.6093	5.28655	60.6946	3.31262			398.528	20.478	7.02976	41.3582	4.22221			398.528	26.5359	6.56748	33.5105	3.1673
	399.912	29.5435	4.77968	61.6667	3.62354			399.912	20.4785	6.9608	41.9414	4.14435			399.912	26.8531	6.64856	34.3205	3.38174
	401.296	29.2992	4.81775	61.4006	3.40376			401.296	20.4917	6.92345	43.3872	4.70863			401.296	27.0145	6.60943	35.2747	3.52059
	402.68	29.5805	4.6845	60.5794	3.04593			402.68	20.4337	7.08007	43.4043	4.9847			402.68	27.112	6.59492	35.8917	3.53423
	404.064	29.0896	4.61573	59.3888	3.04353			404.064	20.4512	7.11287	42.9831	4.88931			404.064	27.8495	6.50085	35.4207	3.45857
	405.447	29.6638	4.63046	61.5998	3.07858			405.447	20.4808	7.12555	43.3204	4.93005			405.447	27.6628	6.19069	35.2671	3.29822
	406.831	28.9843	4.85833	61.5218	3.00886			406.831	20.3893	7.13064	43.0613	5.04885			406.831	27.3272	6.39062	34.8055	3.52324
	408.215	28.7122	4.64296	61.4849	2.55476			408.215	20.7107	7.36993	42.6642	5.31024			408.215	26.9967	6.53868	34.0878	3.55366
	409.599	28.7081	4.71024	60.4901	2.84358			409.599	20.7318	7.38791	43.0163	5.47289			409.599	27.2155	6.88885	33.9459	3.53049
	410.982	28.252	4.55673	58.4799	2.50922			410.982	20.1755	7.15353	43.0767	5.62964			410.982	27.0637	7.07054	33.8582	3.39074
	412.366	28.3251	4.21269	56.9275	3.07596			412.366	19.8854	7.08817	43.0346	5.52849			412.366	26.2924	6.64272	34.0298	3.14382
	413.75	28.4411	4.49403	57.211	3.49386			413.75	20.2211	7.19104	42.5115	5.54434			413.75	26.3405	6.54357	34.2276	3.21546
	415.134	28.9535	4.92881	57.5202	3.56331			415.134	20.3262	7.241	42.9757	5.57296			415.134	27.0557	6.82115	34.3875	3.26851
	416.518	29.1682	5.17195	56.5197	3.09566			416.518	20.4037	7.29289	43.7035	5.84392			416.518	26.604	6.61495	34.3043	3.36009
	417.901	29.0095	4.43781	57.7179	3.2487			417.901	20.7116	7.41507	44.2951	6.07141			417.901	26.3925	6.50632	34.5169	3.42194
	419.285	28.4264	4.58397	59.0283	3.64444			419.285	20.6927	7.41641	44.8387	6.39774			419.285	27.0264	6.8584	34.7846	3.71618
	420.669	28.5724	5.00502	58.7928	3.51243			420.669	20.448	7.41734	45.4352	6.38988			420.669	26.7356	6.62074	35.6938	4.121
	422.053	28.2028	5.03638	59.5438	2.53746			422.053	20.5316	7.53001	45.6586	6.36946			422.053	26.4173	6.36761	36.0839	4.08232
	423.436	27.9921	4.77885	58.5607	2.53913			423.436	20.6959	7.75483	45.4216	7.1249			423.436	26.3698	6.7452	36.3706	4.04104
	424.82	29.2097	5.14765	57.3127	2.8518			424.82	20.7211	7.78373	44.8786	7.12111			424.82	26.3462	7.09369	36.1469	3.95853
	426.204	29.0285	5.26706	56.765	3.18242			426.204	20.7797	7.84259	44.5893	7.60222			426.204	26.5872	7.27992	36.1319	3.86868
	427.588	28.8025	5.03633	56.3833	3.54367			427.588	20.7649	7.85455	45.1934	8.38534			427.588	26.2859	7.0419	35.9876	3.57813
	428.972	27.7105	4.69995	57.636	3.67316			428.972	20.8916	7.95627	45.8391	8.87778			428.972	26.4924	7.19115	36.0443	3.59814
	430.355	27.852	4.65249	58.006	3.75198			430.355	20.9011	7.9639	46.1018	8.96228			430.355	26.0927	7.09925	36.3152	3.99708
	431.739	28.2784	4.85466	56.7759	4.38211			431.739	20.9213	7.96174	46.0342	8.73398			431.739	26.0451	6.93602	35.6948	3.76954
	433.123	28.5301	5.10255	56.9123	4.89231			433.123	21.0868	8.05453	45.2198	8.55907			433.123	26.0765	6.86409	35.2467	3.64652
	434.507	29.1696	5.4886	56.3677	4.4828			434.507	21.1008	8.12342	44.4144	8.45445			434.507	25.7994	6.72647	35.2191	3.87397
	435.89	28.513	5.27527	55.6624	4.48311			435.89	21.1062	8.20524	45.2455	8.95234			435.89	25.4703	6.52608	34.9592	3.94961
	437.274	28.2398	5.09429	57.2701	4.93145			437.274	21.1535	8.24702	45.7866	9.45251			437.274	24.9665	6.23703	34.3125	3.86507
	438.658	28.4848	5.05645	57.4203	5.26135			438.658	21.1444	8.30422	46.1012	9.50108			438.658	25.3538	6.5033	34.1194	3.88642
	440.042	27.7232	5.23389	55.7471	5.61189			440.042	21.3237	8.41198	46.4848	9.73947			440.042	25.5512	6.93883	34.0426	4.09659
	441.426	27.6719	5.07039	55.8391	5.78807			441.426	21.4098	8.36964	46.5702	10.1485			441.426	25.3614	6.98032	33.8998	4.00446
	442.809	27.9042	5.06402	55.5759	5.99548			442.809	20.9805	8.32611	46.4376	10.2398			442.809	24.9466	6.73796	33.8304	4.01014
	444.193	27.468	4.9213	56.1562	5.92129			444.193	21.1568	8.46386	46.0718	10.2987			444.193	24.4227	6.4306	33.5901	4.06043
	445.577	27.1846	5.35573	56.6305	5.75318			445.577	21.442	8.57276	45.9335	10.2198			445.577	24.4202	6.46953	33.6385	3.87299
	446.961	27.7377	5.24529	54.671	6.47026			446.961	21.4011	8.55059	45.5854	10.1559			446.961	25.6176	7.26904	34.0683	3.93337
	448.344	27.8199	5.18849	54.8177	6.80494			448.344	21.6331	8.61731	45.5039	10.5775			448.344	25.5459	7.31401	34.1932	4.28516
	449.728	26.8627	5.0988	55.7097	6.59924			449.728	21.616	8.76877	45.8432	10.3355			449.728	25.1381	7.25319	34.107	4.36882
	451.112	26.8114	5.35514	55.3354	6.42322			451.112	20.9225	8.4571	46.7835	10.3887			451.112	25.2433	7.46536	34.0874	4.37437
	452.496	27.0038	5.24117	54.4079	6.37924			452.496	21.0474	8.5174	46.5202	10.3873			452.496	25.4161	7.47432	34.1385	4.12654
	453.88	26.7688	5.20052	54.8467	6.45444			453.88	21.0938	8.58652	45.9041	9.73761			453.88	25.6512	7.30852	33.9813	3.73597
	455.263	26.394	5.54847	54.9249	6.23486			455.263	20.832	8.46928	45.1675	9.63302			455.263	25.9434	7.21625	34.0245	3.59153
	456.647	26.3226	5.34233	53.6616	6.01155			456.647	21.0859	8.63209	44.7428	9.6449			456.647	25.9615	7.10549	34.3385	3.56738
	458.031	26.8562	5.40401	53.5778	5.96248			458.031	20.9169	8.46948	43.9543	9.71931			458.031	25.4372	6.73435	33.6963	3.39629
	459.415	26.5367	5.42185	52.5658	5.77852			459.415	21.0054	8.5616	43.4407	9.47381			459.415	25.6513	6.71065	33.3128	3.36796
	460.799	26.3686	5.76207	51.3078	5.51563			460.799	20.9691	8.6381	42.7082	9.27292			460.799	25.4146	6.68014	33.0578	3.54766
	462.182	26.3779	5.24489	50.9272	4.88442			462.182	20.9016	8.67171	42.0278	9.04744			462.182	25.2555	6.88787	32.3274	3.87215
	463.566	26.4821	5.1233	50.5037	4.39433			463.566	20.946	8.71846	41.9391	9.02828			463.566	25.1178	6.89096	32.1117	3.95654
	464.95	26.7313	5.43275	50.9926	5.61143			464.95	20.7573	8.63997	41.6072	9.13897			464.95	24.5043	6.49909	32.4214	3.88008
	466.334	26.7057	5.61097	50.242	6.06573			466.334	20.926	8.7025	41.451	9.3016			466.334	24.3593	6.55564	32.5762	3.92035
	467.717	26.1958	5.52659	49.7685	5.25084			467.717	20.7827	8.65729	41.5776	9.54366			467.717	24.5031	6.80838	32.3263	3.9994
	469.101	25.9278	5.53761	49.2514	4.91149			469.101	20.7126	8.54544	41.4204	9.43261			469.101	24.0921	6.59178	32.9446	3.92535
	470.485	26.2014	5.60389	49.7198	5.47756			470.485	21.0867	8.79923	41.4383	9.38203			470.485	24.5752	6.99555	33.3979	3.65583
	471.869	26.1021	5.43997	50.0136	5.14717			471.869	21.0352	8.9002	41.0407	9.0999			471.869	24.3605	7.07882	33.0866	3.48779
	473.253	25.9929	5.32523	48.7887	5.11195			473.253	20.8787	8.84449	40.7156	9.03576			473.253	24.2275	7.14074	33.3397	3.48784
	474.636	25.7274	5.31652	48.2422	5.1162			474.636	20.9609	8.72851	39.7033	8.76586			474.636	24.7894	7.2549	33.1876	3.72181
	476.02	25.5918	5.30603	48.466	4.93634			476.02	20.6403	8.50337	39.7235	8.46074			476.02	24.8745	7.23401	32.5224	3.82385
	477.404	26.2069	5.47154	47.5842	4.78767			477.404	20.5494	8.54303	39.1095	8.0432			477.404	25.5061	7.47236	32.7619	3.7683
	478.788	25.6043	5.25948	47.3193	5.06451			478.788	20.4993	8.5146	38.8553	7.55377			478.788	25.8007	7.68229	32.7856	3.64381
	480.171	24.8358	5.04552	48.2123	5.79979			480.171	20.3974	8.51243	38.7414	7.51833			480.171	25.3998	7.668	32.8807	3.70259
	481.555	25.4018	5.33982	48.7841	5.31175			481.555	20.5227	8.46081	38.3652	7.63627			481.555	25.4987	7.65689	32.9251	3.63388
	482.939	25.6315	5.35995	48.0539	5.09122			482.939	20.2795	8.43317	37.7237	7.54546			482.939	24.9971	7.43239	32.841	3.79698
	484.323	25.5507	5.19069	49.3739	5.10233			484.323	20.2784	8.5708	38.0119	7.746			484.323	24.7065	7.32442	33.2045	3.95777
	485.707	25.7492	5.32899	49.0733	4.99782			485.707	20.3308	8.69987	38.2403	7.24702			485.707	24.57	7.32433	33.371	3.89198
	487.09	25.2286	5.25333	48.0194	5.28222			487.09	20.2462	8.67914	38.514	7.04713			487.09	24.9232	7.56406	33.1107	3.74931
	488.474	24.6775	4.99655	47.0535	4.97808			488.474	19.9707	8.4642	38.728	7.30774			488.474	24.6011	7.21935	32.893	4.0226
	489.858	24.3476	4.87245	46.7305	4.76519			489.858	20.0125	8.42078	37.658	7.35416			489.858	24.715	7.29551	32.3805	3.8652
	491.242	24.7139	5.008	46.9648	4.97087			491.242	20.1885	8.55906	37.3895	7.25005			491.242	24.3648	7.23921	31.5323	3.71795
	492.625	24.9483	5.44107	46.7436	5.37779			492.625	20.2111	8.6646	37.4628	7.16581			492.625	24.5138	7.09847	31.2156	3.80667
	494.009	24.8004	5.03921	47.3459	5.19574			494.009	20.2404	8.69885	36.2741	6.79091			494.009	24.4835	7.10176	31.0333	3.75295
	495.393	24.3839	5.04549	45.3737	4.09114			495.393	20.1419	8.69453	36.3551	6.76996			495.393	23.8736	7.02183	30.7695	3.80343
	496.777	24.4042	5.31329	45.6311	4.31275			496.777	19.7858	8.44822	36.1852	6.46641			496.777	24.0258	7.08872	30.5218	4.07365
	498.161	24.0118	5.33603	46.127	4.68796			498.161	19.6402	8.37637	35.3679	6.10937			498.161	23.523	6.83372	30.3971	4.19238
	499.544	24.163	5.24899	44.8584	4.54356			499.544	19.6899	8.50819	35.0747	6.0362			499.544	23.4698	7.04648	30.5344	3.92445
	500.928	24.9983	5.53376	45.2463	4.48696			500.928	19.5947	8.42478	34.901	5.9613			500.928	23.9035	7.26674	30.4897	3.88944
	502.312	24.5393	5.19842	44.8286	4.72743			502.312	19.6605	8.48649	33.9484	5.86042			502.312	23.578	7.08597	30.007	3.75525
	503.696	23.7306	5.09458	43.3593	4.98624			503.696	19.886	8.5022	33.5984	5.94218			503.696	23.2576	6.93008	29.5203	3.41573
	505.079	23.7372	5.08353	43.7395	4.54029			505.079	19.9867	8.53966	33.6296	5.78177			505.079	23.2427	6.90079	29.4056	3.49295
	506.463	23.8146	5.17456	44.1263	4.6333			506.463	20.0244	8.47496	32.5739	5.31567			506.463	23.395	6.95184	29.5792	3.77088
	507.847	23.6265	5.18795	42.8652	4.01373			507.847	19.5911	8.2656	32.514	5.2462			507.847	23.2789	6.79344	29.4547	3.94624
	509.231	23.5406	5.02897	43.0168	4.03181			509.231	19.5285	8.42987	32.3346	5.44364			509.231	23.0023	6.78613	28.9741	3.96192
	510.615	23.4834	5.17665	43.3498	5.0117			510.615	19.5537	8.58858	32.2313	5.39926			510.615	22.6899	6.73438	29.656	4.22521
	511.998	23.5076	5.32438	42.6811	4.52658			511.998	18.9051	8.18869	32.3259	5.36192			511.998	22.3875	6.68889	29.9257	4.09731
	513.382	24.3646	5.43037	42.3693	4.33598			513.382	18.7365	8.09578	32.044	5.48129			513.382	23.4331	7.51922	30.4356	3.75503
	514.766	24.5145	5.71539	41.5292	3.79721			514.766	18.9535	8.28827	32.1772	5.5681			514.766	23.2464	7.6265	30.907	3.56095
	516.15	23.7289	5.23386	41.0338	3.65459			516.15	19.1603	8.38339	31.4535	5.34937			516.15	22.596	7.279	30.8819	3.44263
	517.533	23.0221	4.94784	41.2286	3.58343			517.533	18.8477	8.17873	30.9564	5.08536			517.533	22.2137	6.97281	30.9076	3.29955
	518.917	22.7597	5.10074	41.1874	4.00478			518.917	18.5105	7.96978	30.7179	4.90446			518.917	22.1274	7.0341	30.9652	3.27032
	520.301	22.8308	5.05412	40.916	4.46515			520.301	18.6012	8.05333	30.1887	4.72266			520.301	22.5043	7.21459	30.7308	3.13942
	521.685	22.4548	5.1673	39.6201	4.04153			521.685	18.5627	8.1003	30.0407	4.72439			521.685	22.8575	7.26496	30.3562	3.00247
	523.069	22.4996	5.29622	39.9181	3.94415			523.069	18.6548	8.19927	29.4056	4.50507			523.069	22.6877	7.20021	30.2535	2.95905
	524.452	21.9565	4.8077	39.4346	3.95374			524.452	18.4021	8.11544	29.1165	4.68547			524.452	22.702	7.36356	29.9899	2.77759
	525.836	22.3779	5.17091	38.6782	4.0095			525.836	18.418	8.15084	28.778	4.68979			525.836	22.7729	7.33501	30.1286	3.20861
	527.22	22.3013	5.02237	38.9056	3.76141			527.22	18.2621	8.03047	28.0759	4.37155			527.22	22.6396	7.16488	29.8975	3.36294
	528.604	22.0899	5.02887	38.9539	3.72078			528.604	17.9864	7.79384	27.8115	4.26856			528.604	22.2687	7.04607	29.5463	3.3301
	529.987	22.3308	5.23472	37.2812	3.30708			529.987	17.7977	7.69837	27.9767	4.20294			529.987	22.149	6.823	29.4272	3.4454
	531.371	21.9245	5.082	37.6265	3.32502			531.371	17.9071	7.86116	28.4533	4.47786			531.371	22.3273	7.05129	29.3885	3.41481
	532.755	22.1962	5.16438	37.7177	3.42074			532.755	17.6253	7.71283	28.2148	4.70366			532.755	21.8458	6.85404	29.3115	3.49875
	534.139	21.934	5.39443	38.4029	4.25941			534.139	17.3357	7.53862	28.0617	4.80606			534.139	21.9218	6.96502	29.4053	3.76132
	535.523	21.3901	5.03638	38.0483	4.02714			535.523	17.3511	7.56029	28.3208	5.08154			535.523	22.223	7.40652	29.0637	3.69105
	536.906	21.7034	5.19403	38.0372	4.25719			536.906	17.1382	7.46659	28.3553	5.00505			536.906	22.0021	7.32683	28.9284	3.85373
	538.29	22.4847	5.63576	37.8224	4.45348			538.29	17.1517	7.49416	28.3949	5.00109			538.29	21.3544	7.01151	29.0877	3.94694
	539.674	22.0494	5.35617	37.7566	4.14642			539.674	17.1191	7.51395	27.8093	4.95151			539.674	21.7851	7.2047	28.3327	3.64329
	541.058	21.3335	5.2723	37.3794	4.27513			541.058	16.8911	7.3717	27.4624	4.89633			541.058	22.1722	7.36457	27.6675	3.7367
	542.441	20.9706	5.12989	35.3795	3.95233			542.441	16.5285	7.23501	27.1381	4.97976			542.441	22.5975	7.63179	27.3991	3.86564
	543.825	21.8389	5.39884	35.3854	3.92419			543.825	16.7064	7.31771	27.1379	4.9936			543.825	22.5826	7.73857	27.5887	3.79892
	545.209	21.7139	5.43991	35.2167	4.03842			545.209	16.91	7.49364	27.4156	5.05166			545.209	22.4484	7.80446	28.0247	3.74272
	546.593	21.5621	5.2763	34.4907	4.21602			546.593	17.13	7.65828	26.1916	4.58121			546.593	22.1074	7.76572	28.0609	3.70131
	547.977	21.0148	5.37826	34.8033	3.65286			547.977	16.9256	7.58239	25.4706	4.38799			547.977	22.3084	7.80931	28.0177	3.86031
	549.36	20.6933	5.07092	33.4379	3.67204			549.36	16.8649	7.54537	25.0002	4.36057			549.36	22.845	8.0202	27.7656	4.08729
	550.744	21.2732	5.17543	33.0611	3.60327			550.744	16.7587	7.42993	24.3064	4.23149			550.744	23.039	8.13841	27.3457	4.13462
	552.128	20.64	4.98547	33.2128	4.05165			552.128	16.6773	7.37285	24.4418	4.35111			552.128	22.2299	7.55878	27.2794	4.10454
	553.512	20.7349	5.01995	32.42	3.91998			553.512	16.5855	7.39321	24.7093	4.6295			553.512	21.755	7.30858	27.1041	3.97115
	554.895	20.77	5.15504	33.9525	4.01215			554.895	16.3932	7.24833	25.0658	4.56277			554.895	21.6527	7.20744	27.1619	3.95181
	556.279	21.0205	5.17624	33.8642	4.73552			556.279	16.3908	7.27444	24.4628	4.47212			556.279	21.2187	7.10739	27.5554	3.9206
	557.663	20.5579	5.14108	33.4837	4.32196			557.663	16.2657	7.26396	23.9774	4.38441			557.663	21.4104	7.48076	27.9572	3.82583
	559.047	21.0634	5.38644	34.085	4.38153			559.047	15.9801	7.11605	24.3358	4.45675			559.047	21.2281	7.48886	27.8144	3.72378
	560.431	20.5895	5.17975	34.4984	4.30781			560.431	15.8537	7.06689	24.4833	4.6503			560.431	21.4205	7.37419	28.1934	3.81949
	561.814	20.0326	5.12392	32.3772	3.72999			561.814	16.0614	7.2232	24.0971	4.49366			561.814	21.7099	7.25301	28.5897	4.01247
	563.198	19.9106	5.21942	32.0502	3.99788			563.198	16.0101	7.20159	23.7831	4.418			563.198	21.8238	7.36207	28.6428	4.19001
	564.582	20.0098	5.26029	32.4644	4.76361			564.582	15.9235	7.27862	23.2479	4.44326			564.582	21.585	7.34353	28.6033	4.19165
	565.966	19.9277	5.36678	32.4553	4.98764			565.966	16.0153	7.41126	23.2002	4.40885			565.966	22.0341	7.80952	28.5996	4.17314
	567.35	20.0172	5.62759	32.092	4.75913			567.35	16.2072	7.47491	23.4699	4.56478			567.35	21.6369	7.7185	28.7136	4.17842
	568.733	19.9369	5.56412	32.3721	4.81919			568.733	16.5533	7.76213	23.0115	4.79037			568.733	21.0477	7.47736	28.5105	4.17381
	570.117	19.9185	5.58422	31.1049	4.40685			570.117	16.5751	7.7168	22.7442	4.62988			570.117	20.6047	7.37894	27.6199	3.92672
	571.501	20.2197	5.56671	30.8276	4.28658			571.501	16.4683	7.76894	22.5837	4.52851			571.501	20.6722	7.28533	27.1043	3.91564
	572.885	19.9639	5.65516	30.6738	4.54264			572.885	16.0626	7.61804	22.0862	4.67477			572.885	21.1868	7.6966	27.1777	4.26915
	574.268	19.9217	5.79287	29.4679	4.11851			574.268	16.2315	7.72072	21.7868	4.50534			574.268	21.0742	7.78633	26.858	4.3458
	575.652	20.0163	5.68462	29.6593	4.23859			575.652	16.3087	7.79857	21.5953	4.6173			575.652	21.3011	8.00057	26.7152	4.39288
	577.036	19.4823	5.60015	30.3867	4.72334			577.036	16.1875	7.75838	21.5313	4.80938			577.036	20.5762	7.58737	26.658	4.43879
	578.42	19.3116	5.58818	30.3438	5.2445			578.42	16.0986	7.76721	21.7498	4.9063			578.42	20.0242	7.36769	26.8825	4.52917
	579.804	19.8277	6.00006	31.3171	5.48922			579.804	15.8323	7.61477	21.5922	4.77792			579.804	20.5127	7.68012	26.993	4.45738
	581.187	19.2013	5.61479	30.9571	4.43963			581.187	15.7048	7.59901	20.8932	4.53708			581.187	20.673	7.77459	26.9837	4.31064
	582.571	19.1507	5.39236	29.0842	3.70963			582.571	15.5774	7.48951	21.1276	4.66989			582.571	20.1716	7.56727	26.9498	4.46781
	583.955	18.9857	5.16053	29.5	4.04201			583.955	15.5252	7.494	21.1379	4.64537			583.955	19.8135	7.35532	26.8218	4.41552
	585.339	18.7797	5.5185	29.5887	4.18324			585.339	15.4374	7.4481	20.8016	4.5524			585.339	19.8837	7.43175	26.8435	4.23383
	586.722	19.2237	5.71419	30.1423	5.51904			586.722	15.3001	7.33723	20.6072	4.62746			586.722	19.7305	7.4168	26.9089	4.27706
	588.106	18.86	5.39085	29.1179	5.32881			588.106	15.0742	7.23094	20.8881	4.87172			588.106	19.6551	7.37668	27.0558	4.40537
	589.49	18.8355	5.39	28.7224	4.80302			589.49	14.7863	7.06303	20.4343	4.76619			589.49	20.0901	7.62483	26.788	4.42838
	590.874	18.9773	5.2705	29.7792	5.12738			590.874	14.5583	6.91942	20.5124	5.01626			590.874	20.0229	7.61348	26.4562	4.59666
	592.258	18.6841	5.10898	29.5644	5.48975			592.258	14.465	6.93341	20.2854	5.09089			592.258	20.0569	7.52663	25.8868	4.7493
	593.641	18.9128	5.40477	28.128	4.95554			593.641	14.3235	6.85289	19.6977	5.01995			593.641	20.418	7.80338	25.0751	4.70697
	595.025	17.9877	5.24515	27.1062	4.92288			595.025	14.2347	6.76708	19.0531	4.8656			595.025	20.3298	7.6619	24.8739	4.76708
	596.409	18.3294	5.46288	28.0733	5.83733			596.409	14.1195	6.74309	18.6722	4.93715			596.409	20.4865	7.76534	25.55	5.09086
	597.793	18.4135	5.36274	27.7881	5.39909			597.793	13.9183	6.61778	18.4702	5.15569			597.793	20.2536	7.72438	25.3996	5.16673
	599.176	17.7828	5.14967	26.737	4.29271			599.176	14.0165	6.67357	18.23	5.29591			599.176	19.5981	7.2899	25.2181	5.33092
	600.56	17.8876	5.13884	27.0737	4.76781			600.56	13.7482	6.59495	17.9693	5.45079			600.56	19.6925	7.55875	25.4305	5.44738
	601.944	17.8578	5.18231	26.8838	5.10477			601.944	13.5917	6.5507	17.9189	5.42686			601.944	19.1626	7.46105	25.3045	5.31317
	603.328	17.4314	4.77535	26.4566	4.65036			603.328	13.6839	6.63208	17.7761	5.291			603.328	18.7955	7.18224	24.7771	4.97836
	604.712	17.6791	5.00892	26.8424	4.59093			604.712	13.6115	6.59097	17.3027	5.0763			604.712	18.3322	6.90248	24.8081	4.78237
	606.095	17.6504	5.05312	25.4354	4.29157			606.095	13.54	6.61694	16.8265	4.83497			606.095	18.3756	6.90903	24.9088	4.64547
	607.479	17.9465	5.42828	25.1924	4.2752			607.479	13.475	6.6233	16.4644	4.83239			607.479	18.5246	7.02877	24.6897	4.47143
	608.863	17.7578	5.45796	25.7189	4.38514			608.863	13.4945	6.62523	16.2486	4.83178			608.863	18.0431	6.76117	24.7041	4.41113
	610.247	17.2106	5.11251	25.9881	4.22021			610.247	13.3122	6.52505	16.3848	4.85326			610.247	17.7311	6.80472	24.6294	4.43271
	611.63	17.7253	5.4664	25.7382	4.41037			611.63	13.2162	6.55447	16.3111	4.84432			611.63	18.099	7.12474	24.6598	4.75022
	613.014	18.3162	6.03717	25.1537	4.46274			613.014	13.1516	6.51483	15.9893	4.80878			613.014	18.6876	7.46913	24.479	4.85154
	614.398	17.5957	5.37941	24.7031	4.50128			614.398	12.8987	6.50796	15.5603	4.69531			614.398	18.9211	7.5939	24.0113	4.85897
	615.782	17.0787	5.10841	23.9667	4.30109			615.782	12.8345	6.4616	15.2327	4.55635			615.782	18.5963	7.406	23.3831	4.6418
	617.166	17.2667	5.15765	23.9827	3.82509			617.166	12.6863	6.35293	14.6885	4.45582			617.166	18.1391	7.27117	22.8179	4.60062
	618.549	16.8906	5.07637	24.1195	4.3875			618.549	12.5659	6.31868	14.6844	4.58666			618.549	17.8759	7.04305	22.2436	4.58367
	619.933	16.8114	5.17504	23.7959	4.53592			619.933	12.4099	6.21214	15.0741	4.96837			619.933	17.6161	6.9454	22.2646	4.54111
	621.317	16.9512	5.30592	23.8967	4.13112			621.317	12.4599	6.2791	15.1675	5.10546			621.317	17.6295	7.03306	21.8476	4.40601
	622.701	16.7456	5.13969	23.2152	3.57982			622.701	12.2263	6.15478	14.6712	4.86756			622.701	17.2116	6.88901	22.1074	4.5035
	624.084	16.6092	5.00438	22.7965	3.57134			624.084	12.1472	6.12971	14.6035	4.85782			624.084	17.3114	7.06686	22.0025	4.39666
	625.468	17.0671	5.15446	23.0033	3.78078			625.468	11.8887	5.94807	14.7241	5.01443			625.468	17.1898	6.77923	21.585	4.18553
	626.852	16.6873	5.22427	23.8352	4.38626			626.852	11.9414	5.99826	14.5477	5.01531			626.852	17.1816	6.77854	21.5739	4.31118
	628.236	16.4498	5.03118	23.476	4.16956			628.236	11.9185	6.00466	14.3107	5.05362			628.236	16.9168	6.82165	21.6821	4.52065
	629.62	16.4537	4.89051	23.6573	4.37659			629.62	11.8502	6.0502	13.9019	4.9074			629.62	16.6933	6.74411	21.6817	4.64016
	631.003	16.9419	5.25725	23.5629	4.37624			631.003	11.9191	6.06896	13.6152	4.7336			631.003	17.1234	7.03421	21.3074	4.53155
	632.387	16.4463	4.9465	23.6788	4.28643			632.387	11.674	5.89035	13.4932	4.73531			632.387	16.7779	6.63397	21.2076	4.43494
	633.771	16.429	4.91865	23.0661	4.40563			633.771	11.7537	5.99456	13.2101	4.62162			633.771	17.0113	6.88807	21.3162	4.40386
	635.155	16.0892	4.80924	23.2154	4.38817			635.155	11.6981	5.95956	13.0644	4.63831			635.155	16.8547	6.83104	21.3278	4.41655
	636.538	16.1184	4.87851	23.423	4.35199			636.538	11.632	5.98159	12.6611	4.4803			636.538	16.4765	6.51765	21.2193	4.49581
	637.922	16.1364	4.89731	22.6408	3.82738			637.922	11.4386	5.85917	12.5712	4.54336			637.922	16.6325	6.65432	20.8815	4.38999
	639.306	16.1697	5.12392	22.1125	3.47285			639.306	11.2544	5.78291	12.5078	4.61821			639.306	16.04	6.40707	20.371	4.35403
	640.69	16.1935	5.1072	22.3723	3.95722			640.69	11.2946	5.87211	12.1235	4.47904			640.69	15.9179	6.34015	20.0664	4.40927
	642.074	15.9775	4.85114	21.6527	4.03486			642.074	11.2401	5.86918	12.1298	4.51802			642.074	15.8506	6.43873	19.8152	4.35073
	643.457	15.9577	5.02555	21.2984	3.79488			643.457	11.0241	5.75359	12.0187	4.53941			643.457	15.7184	6.40846	19.6996	4.32072
	644.841	15.6102	4.69738	22.0284	3.99728			644.841	11.0523	5.82617	11.7004	4.41357			644.841	15.6632	6.2979	20.0681	4.41169
	646.225	15.5737	4.67272	21.5132	3.54848			646.225	11.1848	5.97323	11.3979	4.24298			646.225	15.5794	6.26319	19.6971	4.35328
	647.609	16.0065	4.95529	21.7296	3.81086			647.609	11.0308	5.74136	11.5136	4.47739			647.609	15.4878	6.23067	19.0837	4.31852
	648.992	15.9567	4.99943	21.3797	3.88359			648.992	11.1213	5.82414	11.4076	4.50359			648.992	15.3289	6.1367	19.1115	4.3209
	650.376	15.9003	5.02271	21.8502	4.14416			650.376	11.2008	5.95157	11.1527	4.31799			650.376	15.757	6.55006	19.0255	4.23526
	651.76	15.7911	4.73987	21.6066	4.08582			651.76	11.0548	5.8151	11.1313	4.30878			651.76	16.004	6.71695	19.0669	4.37111
	653.144	15.5569	4.60488	21.3895	3.82861			653.144	10.9723	5.88706	11.0336	4.35712			653.144	15.5359	6.22556	19.1452	4.38949
	654.528	15.6073	4.85773	21.1033	3.89026			654.528	10.7567	5.79561	10.8693	4.23785			654.528	15.4297	6.25007	18.4301	4.16142
	655.911	15.9431	4.92628	20.6816	3.96264			655.911	10.5611	5.67036	10.8321	4.31711			655.911	15.5092	6.19588	17.9657	4.01936
	657.295	15.9742	4.83675	20.5255	4.20513			657.295	10.5942	5.72159	11.0957	4.5951			657.295	15.1999	6.14676	17.8327	4.09879
	658.679	15.921	5.03426	21.2994	4.1536			658.679	10.4952	5.7245	10.8228	4.49867			658.679	14.8904	6.015	17.8473	4.21637
	660.063	15.3201	4.646	20.8022	4.13976			660.063	10.3057	5.52655	10.6025	4.3243			660.063	14.7544	6.00637	17.9601	4.1637
	661.447	15.4549	4.76372	20.7953	4.37982			661.447	10.1362	5.42756	10.7029	4.42592			661.447	14.3681	5.81923	17.8375	4.08272
	662.83	15.7127	4.78984	21.0251	4.5044			662.83	9.99219	5.34262	10.5247	4.36249			662.83	14.4254	5.83872	17.6406	4.1448
	664.214	15.3506	4.61852	20.8699	4.35015			664.214	9.94958	5.30536	10.2866	4.16041			664.214	14.3435	5.81932	17.8107	4.17068
	665.598	15.0215	4.48998	20.9516	4.57697			665.598	9.86811	5.27509	10.3992	4.12354			665.598	14.3345	5.80641	17.8196	4.17402
	666.982	14.9205	4.47422	19.9975	3.76864			666.982	9.74907	5.2023	10.4508	4.21602			666.982	13.8688	5.38383	17.5564	4.11422
	668.365	14.4457	4.27251	19.9023	3.80697			668.365	9.35987	4.99159	10.4467	4.27189			668.365	13.7333	5.45453	17.0911	3.95473
	669.749	15.0352	4.52794	19.1837	3.67801			669.749	9.36553	5.00999	10.2272	4.08389			669.749	13.548	5.50934	16.8033	3.82486
	671.133	14.8628	4.51566	19.3665	3.48351			671.133	9.51502	5.11291	9.63869	3.78151			671.133	13.7822	5.44055	16.7895	3.81311
	672.517	14.6915	4.49405	20.3377	3.66074			672.517	9.61522	5.25104	9.41647	3.63717			672.517	13.9287	5.42706	16.7729	3.71017
	673.901	14.9229	4.69611	19.6831	3.23564			673.901	9.41709	5.07462	9.43374	3.6109			673.901	13.4376	5.13315	16.6901	3.64949
	675.284	14.856	4.48424	19.479	3.51404			675.284	9.50288	5.07784	9.58066	3.57196			675.284	13.142	5.01401	16.6918	3.63903
	676.668	14.6738	4.32785	19.1183	3.60429			676.668	9.58734	5.14329	9.43025	3.52435			676.668	13.2792	5.15323	16.9249	3.76843
	678.052	14.9204	4.5105	18.8679	3.49241			678.052	9.23241	4.93315	9.21153	3.31486			678.052	13.3387	5.12792	16.8089	3.77489
	679.436	14.654	4.37995	19.449	3.62229			679.436	9.19507	4.9211	9.56358	3.41672			679.436	13.1858	5.07717	16.4533	3.62454
	680.819	14.7818	4.52551	18.6245	3.1214			680.819	9.14475	4.90781	9.48395	3.42873			680.819	13.0944	5.00516	16.2395	3.3743
	682.203	14.7789	4.52748	19.0319	3.04436			682.203	9.05741	4.83786	9.12839	3.1983			682.203	13.1057	5.02265	16.1568	3.27296
	683.587	14.6921	4.43054	19.1379	2.86674			683.587	9.18333	4.90105	9.0072	3.11322			683.587	13.131	5.06688	16.2613	3.32372
	684.971	14.453	4.51255	18.9204	2.80295			684.971	9.15699	4.82963	9.23231	3.29221			684.971	13.12	5.02106	16.1212	3.31374
	686.355	14.4273	4.32334	19.344	3.09745			686.355	8.97624	4.74942	9.16152	3.22833			686.355	12.7416	4.64103	15.9441	3.39832
	687.738	14.7186	4.64295	19.6924	3.37927			687.738	9.10823	4.86946	9.07984	3.17237			687.738	12.6097	4.42917	15.7938	3.17461
	689.122	14.9431	4.83294	19.3893	3.29434			689.122	9.03005	4.77662	8.95123	3.11998			689.122	12.7693	4.61705	15.7677	3.01569
	690.506	14.8526	4.5014	19.2595	3.24866			690.506	9.19815	4.83326	8.99053	3.25693			690.506	13.3562	5.02545	16.0019	2.97594
	691.89	14.9918	4.54985	18.9439	3.20797			691.89	9.3501	4.95018	8.73909	3.06892			691.89	12.8114	4.70583	15.77	2.8579
	693.273	14.707	4.60682	18.5659	3.08801			693.273	9.20534	4.85088	8.71194	3.00559			693.273	12.7709	4.70692	15.701	2.9139
	694.657	14.1836	4.24601	18.9753	3.12677			694.657	9.10958	4.77739	8.86029	3.05719			694.657	12.8828	4.71337	15.5095	2.87394
	696.041	14.4894	4.2868	19.5098	3.19131			696.041	9.12778	4.69913	8.76729	2.99728			696.041	12.8953	4.58669	15.4134	2.88275
	697.425	14.4533	4.34468	19.1811	3.17501			697.425	8.86368	4.53691	8.59589	2.9044			697.425	12.7613	4.49743	15.2657	2.80406
	698.809	14.3561	4.34655	19.1547	3.163			698.809	8.74343	4.45543	8.71729	3.00758			698.809	12.7378	4.50776	15.4632	2.70484
	700.192	14.5606	4.35046	18.7692	3.10918			700.192	8.85998	4.48186	8.68313	2.96231			700.192	12.8238	4.64739	15.3989	2.68329
	701.576	14.6675	4.45865	18.7625	3.11828			701.576	8.80093	4.4117	8.39773	2.81891			701.576	13.0955	4.79684	15.1883	2.64648
	702.96	14.6207	4.4541	19.2204	3.34298			702.96	8.9283	4.50777	8.2035	2.73225			702.96	13.0919	4.58378	15.1418	2.5588
	704.344	14.9039	4.4965	19.1714	3.28126			704.344	9.10834	4.60848	8.13787	2.58185			704.344	13.0134	4.55711	15.1996	2.55845
	705.727	14.9075	4.6563	18.3825	2.80658			705.727	9.09926	4.57822	8.25947	2.66795			705.727	13.0755	4.63756	14.9868	2.50851
	707.111	14.5424	4.44608	19.5055	3.21281			707.111	8.80463	4.39333	8.29198	2.69767			707.111	12.7126	4.38403	15.0805	2.48386
	708.495	14.6281	4.37128	19.1558	3.04123			708.495	8.8106	4.41601	8.41708	2.68479			708.495	12.6392	4.36597	15.1648	2.43023
	709.879	14.9409	4.50839	18.9685	2.88509			709.879	8.879	4.45612	8.28869	2.57551			709.879	12.7012	4.41685	15.2852	2.38572
	711.263	14.3405	4.30914	19.0459	2.99438			711.263	8.94486	4.46471	8.27243	2.619			711.263	12.5252	4.2133	15.3292	2.38021
	712.646	13.9274	4.0589	18.9893	3.23401			712.646	8.77429	4.3399	8.28066	2.56351			712.646	12.7101	4.16867	15.3687	2.43836
	714.03	14.4	4.334	18.5368	2.93305			714.03	8.86759	4.39278	8.22345	2.51449			714.03	12.8041	4.20275	15.4101	2.42277
	715.414	14.8716	4.47995	19.0496	3.17999			715.414	8.85442	4.38972	8.28273	2.59472			715.414	12.7644	4.23829	15.2138	2.27522
	716.798	14.6903	4.37545	18.3663	2.91547			716.798	8.93858	4.4517	8.13292	2.48887			716.798	12.4065	4.10175	14.864	2.18441
	718.181	14.6578	4.39443	18.9673	2.8442			718.181	9.15371	4.58626	8.15761	2.50828			718.181	12.2107	4.06706	14.8432	2.2409
	719.565	15.1874	4.69836	19.0196	2.952			719.565	9.00958	4.52188	8.21996	2.49414			719.565	12.6282	4.27229	14.8868	2.16012
	720.949	15.3044	4.89107	18.4755	3.06328			720.949	8.95997	4.49342	8.42388	2.58052			720.949	12.4356	4.19959	14.8132	2.05048
	722.333	15.6062	4.92813	19.559	3.39917			722.333	9.11348	4.57652	8.43539	2.55687			722.333	12.1299	4.00144	14.9535	2.16336
	723.717	15.4358	4.98304	18.7628	2.89233			723.717	9.3037	4.67188	8.54135	2.5871			723.717	12.1997	3.93471	14.9224	2.15738
	725.1	15.0637	4.82492	18.5697	2.79323			725.1	9.39897	4.68059	8.25575	2.42065			725.1	12.5985	4.29592	14.751	2.04478
	726.484	14.9175	4.62108	19.393	3.02681			726.484	9.31101	4.67098	8.26997	2.40269			726.484	13.2059	4.56633	14.3772	1.90018
	727.868	14.6712	4.5414	19.0511	3.07254			727.868	9.14732	4.60168	8.26357	2.39392			727.868	12.6959	4.26231	14.4185	1.71938
	729.252	14.4777	4.4499	19.402	3.01368			729.252	9.05514	4.52963	8.4428	2.36317			729.252	12.9313	4.31815	14.864	1.62796
	730.635	14.3637	4.30546	18.8627	2.97703			730.635	9.06749	4.53375	8.70638	2.4458			730.635	13.2648	4.56252	15.0076	1.57255
	732.019	14.6842	4.51097	19.2447	3.13448			732.019	8.87025	4.42651	8.70761	2.56471			732.019	12.8276	4.32796	15.1696	1.63934
	733.403	14.7294	4.43944	19.3621	3.02647			733.403	8.77007	4.3835	8.55761	2.52859			733.403	12.609	4.17156	15.07	1.69197
	734.787	14.7142	4.38956	18.5924	2.78563			734.787	8.64999	4.30397	8.49237	2.54497			734.787	12.6888	4.26727	14.6918	1.70468
	736.171	14.2775	4.07835	18.4744	2.87289			736.171	8.44106	4.15798	8.5107	2.55532			736.171	12.2712	4.10603	14.6823	1.83127
	737.554	14.2089	4.23091	18.4584	2.57136			737.554	8.5289	4.22804	8.40637	2.54181			737.554	11.9793	3.97898	14.3687	1.90031
	738.938	14.4941	4.34412	19.0276	2.82828			738.938	8.52931	4.2682	8.47406	2.60041			738.938	11.7891	3.88179	14.4078	1.90622
	740.322	14.2042	4.07213	18.8156	2.66549			740.322	8.69187	4.36131	8.35947	2.6601			740.322	12.0308	3.95884	14.7066	1.93056
	741.706	14.1749	3.99011	18.9879	2.89119			741.706	8.6677	4.37062	8.15123	2.52885			741.706	11.9305	3.86136	14.193	1.87271
	743.089	14.435	4.21528	18.4483	2.76898			743.089	8.56842	4.33767	8.14692	2.51474			743.089	11.9777	3.95101	13.799	1.7909
	744.473	14.442	4.16884	17.2533	2.58587			744.473	8.50699	4.28252	7.99505	2.43799			744.473	12.0069	3.96634	13.6273	1.67626
	745.857	14.5382	4.11513	17.9103	2.56139			745.857	8.48374	4.22434	8.19795	2.46617			745.857	11.5967	3.82753	13.6891	1.54688

## Sheet: Fig.4C
WFA	dep	non		Agg	dep	non		PV	dep	non
	34.4415	72.83			31.4008	37.6539			41.7149	46.4938
	49.5684	52.4498			42.8609	41.9421			43.5518	31.176
	22.1131	66.1428			17.7969	48.3827			17.4813	26.727
	36.9168	72.3582			10.7908	47.7521			20.6596	29.7534
	25.515	81.9766			4.91138	38.8133			17.0213	34.4755

## Sheet: Fig.4D
WFA	PV+		PV-			Agg	PV+		PV-
	dep	non	dep	non			dep	non	dep	non
mean	50.4837	125.824	31.2634	80.8058		mean	31.3966	84.7519	22.618	43.1295
sem	3.04272	4.77648	0.768422	1.52408		sem	1.57314	4.53849	0.86943	1.22427
