# Supplementary material for: Homeostatic regulation of perisynaptic matrix metalloproteinase 9 (MMP9) activity in the amblyopic visual cortex
Source: eLife. 2019 Dec 23;8:e52503. doi: 10.7554/eLife.52503 (PMC6961978; doi:10.7554/eLife.52503)
Supplement: Figure 5—source data 1. [file elife-52503-fig5-data1.xlsx]

## Sheet: Fig.5B
Em (nm)	AU
550	12022
555	9670.24
560	16075.3
565	25012.4
570	33678.6
575	41801
580	46317.4
585	47825.4
590	44749.1
595	42378.6
600	36751.4
605	32774.8
610	27455.5
615	25569.9
620	23043.8
625	20559.4
630	17907
635	17834.3
640	16537.7
645	14842.1
650	13782.3
655	12445.8
660	11916.1
665	10937.8
670	11135.8
675	10493.2
680	9255
685	8944.23
690	9067.39
695	9538.15
700	10776.2

## Sheet: Fig.5C
time (s)	biomarker pixel 0 cd/cm2	biomarker pixel 300 cd/cm2	GFP pixel 0 cd/cm2	GFP pixel 300 cd/cm2		time (s)	biomarker dF/F 0 cd/cm2	biomarker dF/F 300 cd/cm2	GFP dF/F 0 cd/cm2	GFP dF/F 300 cd/cm2
-10	108.479	90.0571	255.41	262.63		-10	0.0234418	-0.0949035	-0.017655	0.0238236
-9	102.867	105.557	255.981	264.7		-9	-0.02951	0.0608754	-0.0154607	0.0318924
-8	101.315	88.8571	257.276	268.456		-8	-0.0441466	-0.106964	-0.010478	0.0465334
-7	102.297	95.0714	255.677	265.696		-7	-0.0348877	-0.0445085	-0.0166303	0.0357755
-6	86.0571	98.5	254.624	270.605		-6	-0.188098	-0.0100503	-0.0206815	0.0549121
-5	102.972	107.514	266.201	265.811		-5	-0.0285156	0.0805457	0.023848	0.0362227
-4	105.716	102.614	266.281	263.383		-4	-0.00262938	0.0312995	0.024153	0.0267567
-3	105.758	105.471	259.309	261.433		-3	-0.00222747	0.0600141	-0.00265922	0.0191549
-2	106.435	86.0571	263.972	255.59		-2	0.00416059	-0.135105	0.0152738	-0.00362117
-1	106.37	100.186	267.413	259.466		-1	0.00354075	0.00689146	0.0285099	0.0114873
0	105.994	99.5	260.001	256.519		0	0	0	0	0
1	105.027	109.014	259.103	262.452		1	-0.00912972	0.0956211	-0.00345076	0.0231269
2	103.904	121.743	259.749	257.45		2	-0.0197246	0.223547	-0.00096769	0.00362819
3	103.89	126.114	258.467	256.31		3	-0.019852	0.26748	-0.00589921	-0.000813195
4	104.525	120.071	259.296	255.535		4	-0.0138677	0.206748	-0.00271038	-0.00383636
5	104.292	136.557	258.556	260.856		5	-0.016065	0.372433	-0.00555575	0.0169087
6	98.9647	137.186	255.333	261.185		6	-0.0663223	0.378751	-0.0179546	0.0181909
7	88.8571	142.514	256.432	259.484		7	-0.161682	0.432305	-0.0137277	0.0115594
8	99.1073	122.814	257.077	258.92		8	-0.064977	0.234315	-0.011243	0.00935954
9	98.2832	132.229	259.6	254.813		9	-0.0727519	0.328931	-0.00154153	-0.00665136
10	98.8809	129.743	262.322	265.172		10	-0.0671129	0.303949	0.00892844	0.0337324
11	100.867	132.614	257.781	261.873		11	-0.0483799	0.332807	-0.00853728	0.0208737
12	101.533	123.5	256.436	261.567		12	-0.0420946	0.241206	-0.0137096	0.0196781
13	101.645	111.171	258.881	260.31		13	-0.0410333	0.117301	-0.00430768	0.0147779
14	102.517	127.257	258.58	258.88		14	-0.032813	0.278966	-0.00546575	0.00920517
15	102.77	148.4	256.527	259.057		15	-0.0304204	0.491457	-0.0133603	0.00989322
16	105.706	138.114	253.331	261.192		16	-0.00271901	0.388083	-0.0256515	0.0182174
17	107.041	145.329	254.887	260.278		17	0.0098741	0.460589	-0.0196684	0.0146543
18	106.18	130.943	257.557	269.526		18	0.00175198	0.316009	-0.00939805	0.0507042
19	107.659	130.786	267.626	262.63		19	0.0157074	0.314429	0.0293295	0.0238236
20	107.712	138.771	270.566	266.845		20	0.0162074	0.394687	0.0406353	0.0402547
21	104.347	136.486	271.422	268.145		21	-0.0155385	0.371716	0.0439291	0.0453214
22	104.391	147.171	269.673	264.3		22	-0.0151319	0.47911	0.0372007	0.0303326
23	104.016	159.414	264.252	266.873		23	-0.0186623	0.602154	0.0163526	0.0403647
24	102.476	140.971	262.466	268.709		24	-0.0331942	0.416798	0.00947997	0.0475212
25	105.992	141.086	258.25	268.685		25	-2.5473e-05	0.417947	-0.00673537	0.0474273
26	101.319	142.757	261.068	267.281		26	-0.0441136	0.434745	0.0041046	0.041954
27	99.0368	145.171	264.976	266.541		27	-0.0656421	0.459009	0.0191373	0.0390688
28	98.467	148.4	261.088	259.812		28	-0.0710178	0.491457	0.00418114	0.0128361
29	99.0834	138.114	258.858	261.728		29	-0.0652024	0.388083	-0.00439422	0.0203057
30	98.2756	145.329	257.353	260.437		30	-0.0728236	0.460589	-0.0101846	0.0152718
31	102.428	140.943	254.653	261.012		31	-0.0336517	0.416512	-0.0205676	0.0175149
32	105.047	140.786	257.253	260.225		32	-0.00894386	0.414932	-0.010568	0.0144457
33	104.342	138.771	260.844	257.75		33	-0.0155895	0.394687	0.00324461	0.0047977
34	104.319	146.486	256.591	260.275		34	-0.0158037	0.472218	-0.0131123	0.0146414
35	103.644	147.171	259.243	260.207		35	-0.022171	0.47911	-0.00291268	0.0143759
36	104.975	159.414	264.748	260.639		36	-0.00961748	0.602154	0.0182588	0.0160596
37	107.397	140.971	258.131	262.156		37	0.0132356	0.416798	-0.00718998	0.021975
38	108.795	141.086	254.269	257.645		38	0.0264193	0.417947	-0.0220434	0.00438954
39	107	147.486	255.109	263.065		39	0.00948728	0.482268	-0.0188126	0.0255182
40	107.445	142.914	261.773	265.087		40	0.0136856	0.436325	0.00681614	0.0334022

## Sheet: Fig.5D
time (s)	0 cd/m2 mean	0 cd/m2 sem	300 cd/m2 mean	300 cd/m2 sem
-10	-0.0483252	0.0159029	-0.0126211	0.031767
-9	-0.0391817	0.0119491	-0.0158454	0.0301559
-8	-0.0458936	0.0192435	-0.0229443	0.0302275
-7	-0.0302393	0.0203903	-0.00786068	0.0288567
-6	-0.0157839	0.0193849	-0.00322565	0.0195088
-5	-0.0372987	0.0139395	0.022457	0.0242856
-4	-0.0958223	0.0828979	0.0201918	0.0195577
-3	-0.0145666	0.0223569	0.0331484	0.0277933
-2	-0.0491718	0.0135364	0.0221316	0.0340159
-1	0.0179386	0.0176773	0.015767	0.0190743
0	0	0	0	0
1	-0.052277	0.0154714	0.031926	0.0178772
2	-0.0196376	0.0225195	0.0793299	0.0311449
3	-0.0208888	0.0210235	0.08151	0.0390744
4	-0.0418617	0.0165488	0.0866173	0.0306625
5	-0.0205346	0.0190215	0.111818	0.0431734
6	-0.0259773	0.0251466	0.11462	0.0401809
7	-0.0453545	0.0187372	0.107904	0.0428263
8	-0.0418654	0.0204572	0.10103	0.0320508
9	-0.0765987	0.022908	0.117457	0.0356364
10	-0.0459193	0.0154232	0.106468	0.03424
11	-0.06672	0.0253758	0.116411	0.0373494
12	-0.0415538	0.0229739	0.111387	0.0363146
13	-0.0213437	0.0166476	0.0921658	0.0282663
14	-0.0266853	0.016853	0.130224	0.0343782
15	-0.0316931	0.0231826	0.156437	0.042388
16	-0.0311494	0.0151312	0.166588	0.0366024
17	-0.0411579	0.0195534	0.176856	0.040939
18	-0.0397073	0.0173039	0.16054	0.0359938
19	-0.00337707	0.0191711	0.131291	0.0337922
20	-0.0269134	0.0218051	0.148239	0.0351604
21	-0.0337367	0.011257	0.132772	0.0369912
22	-0.0125232	0.017516	0.127056	0.043427
23	-0.0397556	0.0253984	0.163472	0.0496701
24	-0.0456593	0.0248558	0.146022	0.0369931
25	-0.00248959	0.0169042	0.134461	0.0396884
26	-0.0229483	0.0237084	0.15053	0.0404066
27	-0.00668647	0.0189272	0.152537	0.0455072
28	0.00531396	0.0226766	0.158996	0.0433944
29	-0.0265962	0.0199149	0.170052	0.0403625
30	-0.0177717	0.0208958	0.162434	0.0412626
31	-0.00230261	0.0227868	0.167177	0.0397888
32	-0.0114326	0.0187438	0.18991	0.0448996
33	-0.0431832	0.0192226	0.166441	0.0447255
34	0.0077531	0.025047	0.174472	0.0424707
35	-0.0316979	0.0149418	0.181528	0.0442076
36	-0.0287425	0.0174974	0.209433	0.0551677
37	0.000902296	0.0208331	0.176209	0.0411994
38	-0.0322613	0.0197688	0.188829	0.0394909
39	-0.0352119	0.0224104	0.189438	0.0410863
40	0.00546058	0.0223386	0.16877	0.0430775

## Sheet: Fig.5E
	0 cd/m2 mean	300 cd/m2 mean	150000 cd/m2 mean	0 cd/m2 sem	300 cd/m2 sem	150000 cd/m2 sem
0 hr	0.0102455	-0.0097761		0.0101941	0.0150797
18 hr	-0.0157372	0.00350967	0.0896428	0.0328638	0.0258604	0.0130845
10 d	0.018879	0.169167	0.148072	0.0194023	0.0205289	0.0251426
10 d MMP9i	-0.026814	-0.0122601	0.00229385	0.0127704	0	0.0134128
